# Supplementary material for: Histone Deacetylase 11 Knockdown Blocks Larval Development and Metamorphosis in the Red Flour Beetle, Tribolium castaneum
Source: Front Genet. 2020 Jul 3;11:683. doi: 10.3389/fgene.2020.00683 (PMC7348043; doi:10.3389/fgene.2020.00683)
Supplement: Supplementary file 2 [file Table_1.XLSX]

## Sheet: dsHDAC11-DEG
	dsHDAC11-DEG
	Feature ID	Fold Change	P-value	Locus Tag	Gene Description	Other_designations
1	LOC660270	153.709	0	TcasGA2_TC010423	cytochrome P450-like protein	; cytochrome P450 4C1|AUGUSTUS-3.0.2_10423|GLEAN_10423
2	LOC107398756	96.8835	0.0142223	TcasGA2_TC031369	larval/pupal cuticle protein H1C-like	; larval/pupal cuticle protein H1C-like|AUGUSTUS-3.0.2_31369
3	LOC103314306	40.6722	0.000202425		uncharacterized LOC103314306	; uncharacterized protein LOC103314306
4	LOC660015	38.0436	0.000101508		probable palmitoyltransferase ZDHHC24	; probable palmitoyltransferase ZDHHC24|AUGUSTUS-3.0.2_06858|GLEAN_06858|putative palmitoyltransferase ZDHHC24-like Protein
5	LOC656244	36.5762	0.0441928	TcasGA2_TC011457	coiled-coil domain-containing protein 186	; coiled-coil domain-containing protein 186|AUGUSTUS-3.0.2_11457|GLEAN_11457|uncharacterized protein C10orf118 homolog
6	LOC656118	33.4161	0.00029136	TcasGA2_TC006720	protein transport protein SFT2	; protein transport protein SFT2|AUGUSTUS-3.0.2_06720|GLEAN_06720|Protein transport protein SFT2-like Protein
7	LOC100142258	32.3952	0.000368051	TcasGA2_TC014099	uncharacterized LOC100142258	; uncharacterized protein LOC100142258|AUGUSTUS-3.0.2_14099|GLEAN_14099
8	LOC656180	31.8766	1.34701e-05	TcasGA2_TC007998	otopetrin-1	; otopetrin-1|AUGUSTUS-3.0.2_32793|GLEAN_07998
9	LOC103314950	30.5622	3.53733e-05	TcasGA2_TC031491	uncharacterized LOC103314950	; uncharacterized protein LOC103314950|AUGUSTUS-3.0.2_31491
10	LOC103314142	30.4179	0.0310789	TcasGA2_TC006787, nplp1	neuropeptide-like 1	; neuropeptide-like 1|AUGUSTUS-3.0.2_06787|GLEAN_06787|neuropeptide-like precursor 1
11	LOC103314322	30.3758	3.5933e-05	TcasGA2_TC010210	stress response protein NST1	; stress response protein NST1|AUGUSTUS-3.0.2_10210|GLEAN_10210
12	LOC663216	29.9868	0.000639801	TcasGA2_TC005338	alpha-crystallin A chain	; alpha-crystallin A chain|AUGUSTUS-3.0.2_05338|GLEAN_05338|Protein lethal(2)essential for life-like Protein
13	LOC660562	29.8035	0.00231745	TcasGA2_TC011933	rho GTPase-activating protein 100F	; rho GTPase-activating protein 100F|AUGUSTUS-3.0.2_34383|GLEAN_11933|GLEAN_11934|Rho GTPase-activating protein 100F-like Protein
14	LOC663669	29.5249	4.74106e-05	TcasGA2_TC006397	uncharacterized LOC663669	; uncharacterized protein LOC663669|AUGUSTUS-3.0.2_06397|GLEAN_06397
15	LOC661545	28.9577	0.00124172	TcasGA2_TC013668	SHC SH2 domain-binding protein 1	; SHC SH2 domain-binding protein 1|AUGUSTUS-3.0.2_13668|GLEAN_13668|SHC SH2 domain-binding protein 1-like Protein
16	Tcjheh-r1	28.1436	0.0097552	TcasGA2_TC003437	juvenile hormone epoxide hydrolase-like protein 1	; juvenile hormone epoxide hydrolase-like protein 1|AUGUSTUS-3.0.2_03437|GLEAN_03437|Juvenile hormone epoxide hydrolase 1-like Protein
17	LOC657369	27.1972	0.021852	TcasGA2_TC010508, PGRP, Pgrp-le	peptidoglycan recognition protein LE	; peptidoglycan-recognition protein LE|AUGUSTUS-3.0.2_10508|GLEAN_10508|Peptidoglycan-recognition protein LE-like Protein
18	LOC103313754	26.4461	1.11583e-07	TcasGA2_TC003055	cuticle protein 65	; cuticle protein 65|AUGUSTUS-3.0.2_03055|GLEAN_03055
19	LOC657205	25.4669	0.0104595	TcasGA2_TC006324	PI-PLC X domain-containing protein 3	; PI-PLC X domain-containing protein 3|AUGUSTUS-3.0.2_06324|GLEAN_06324|PI-PLC X domain-containing protein 3-like Protein
20	LOC103313873	24.9467	0.00205404	TcasGA2_TC005926	trichohyalin	; trichohyalin|AUGUSTUS-3.0.2_34000|GLEAN_05926
21	LOC656701	24.6062	2.63218e-05	TcasGA2_TC012222	activated CDC42 kinase 1	; activated CDC42 kinase 1|AUGUSTUS-3.0.2_12222|Activated CDC42 kinase 1-like Protein|GLEAN_12222
22	LOC657769	23.3422	4.50211e-05		facilitated trehalose transporter Tret1	; facilitated trehalose transporter Tret1|AUGUSTUS-3.0.2_01414|Facilitated trehalose transporter Tret1-2 homolog-like Protein|GLEAN_01414
23	LOC664472	23.0924	0.0271186	TcasGA2_TC010024	endocytosis protein end4	; endocytosis protein end4|AUGUSTUS-3.0.2_10024|GLEAN_10024
24	LOC100142501	22.575	0.000463236	TcasGA2_TC032845	UDP-glucuronosyltransferase 2C1	; UDP-glucuronosyltransferase 2C1|AUGUSTUS-3.0.2_32845|UDP-glucuronosyltransferase 2C1-like Protein
25	LOC103312762	21.5738	0.0159762	TcasGA2_TC032959	uncharacterized LOC103312762	; uncharacterized protein LOC103312762|AUGUSTUS-3.0.2_32959
26	LOC107397811	20.1415	0.000131817		uncharacterized LOC107397811	; uncharacterized protein LOC107397811
27	LOC657831	19.5652	1.20394e-07	TcasGA2_TC010359	mediator of RNA polymerase II transcription subunit 18	; mediator of RNA polymerase II transcription subunit 18|AUGUSTUS-3.0.2_10359|GLEAN_10359|Mediator of RNA polymerase II transcription subunit 18-like Protein
28	LOC103312396	19.3229	0.000164123	TcasGA2_TC031851	uncharacterized LOC103312396	; uncharacterized protein LOC103312396|AUGUSTUS-3.0.2_31851|GLEAN_14829
29	LOC103314559	19.1334	0.011468	TcasGA2_TC031170	uncharacterized LOC103314559	; uncharacterized protein LOC103314559|AUGUSTUS-3.0.2_31170|GLEAN_10315|GLEAN_10316
30	LOC103313286	18.0428	0.00298825		uncharacterized LOC103313286
31	LOC655848	17.8742	0	TcasGA2_TC004015	uncharacterized LOC655848	; uncharacterized protein LOC655848|AUGUSTUS-3.0.2_04015|GLEAN_04015
32	LOC103312217	17.5851	0.0005278	TcasGA2_TC003258	breast cancer type 2 susceptibility protein homolog	; breast cancer type 2 susceptibility protein homolog|AUGUSTUS-3.0.2_03258|GLEAN_03258
33	LOC660160	17.437	1.37883e-05	TcasGA2_TC003206, Hiw	highwire	; LOW QUALITY PROTEIN: E3 ubiquitin-protein ligase MYCBP2|AUGUSTUS-3.0.2_03206|AUGUSTUS-3.0.2_03207|E3 ubiquitin-protein ligase MYCBP2-like Protein|GLEAN_03206|GLEAN_03207|MYC binding protein 2
34	LOC657525	17.3697	3.82049e-07	TcasGA2_TC002147	inactive peptidyl-prolyl cis-trans isomerase shutdown	; inactive peptidyl-prolyl cis-trans isomerase shutdown|AUGUSTUS-3.0.2_02147|GLEAN_02147|Inactive peptidyl-prolyl cis-trans isomerase shutdown-like Protein
35	LOC658704	16.5777	0.00037488	TcasGA2_TC004504	protein FAM184A	; LOW QUALITY PROTEIN: protein FAM184A|AUGUSTUS-3.0.2_04504|AUGUSTUS-3.0.2_04505|GLEAN_04504|GLEAN_04505
36	LOC103313279	16.4019	0.00087917		uncharacterized LOC103313279
37	LOC103313833	16.1336	0.000251112	TcasGA2_TC010133	uncharacterized LOC103313833	; uncharacterized protein LOC103313833|AUGUSTUS-3.0.2_10133|GLEAN_10133
38	LOC103314918	15.4438	0.00133086	TcasGA2_TC010432	hypothetical protein	; uncharacterized protein LOC103314918|AUGUSTUS-3.0.2_10432|GLEAN_10432
39	LOC656616	15.054	0.0460263	TcasGA2_TC006195	uncharacterized LOC656616	; uncharacterized protein LOC656616|GLEAN_06195
40	LOC657000	14.9616	0.0469841	TcasGA2_TC031404	innexin inx7-like	; innexin inx7-like|AUGUSTUS-3.0.2_31404|Innexin inx7-like Protein
41	LOC656714	14.7513	0.000521213		uncharacterized LOC656714	; uncharacterized protein LOC656714|AUGUSTUS-3.0.2_16004|GLEAN_16004
42	LOC657425	13.8111	1.35989e-06		prostaglandin reductase 1-like	; LOW QUALITY PROTEIN: prostaglandin reductase 1-like
43	LOC107397426	13.5366	0.000992523		multidrug resistance-associated protein 4-like	; multidrug resistance-associated protein 4-like
44	LOC103312464	13.4789	0.00235911		uncharacterized LOC103312464
45	LOC103313807	13.2798	0.00113768	TcasGA2_TC008703	hypothetical protein	; uncharacterized protein LOC103313807|AUGUSTUS-3.0.2_08703|GLEAN_08703
46	LOC656628	13.261	0.0132156	TcasGA2_TC001744	probable hydroxyacid-oxoacid transhydrogenase, mitochondrial	; probable hydroxyacid-oxoacid transhydrogenase, mitochondrial|AUGUSTUS-3.0.2_01744|GLEAN_01744|putative hydroxyacid-oxoacid transhydrogenase, mitochondrial-like Protein
47	LOC657172	13.1799	0	TcasGA2_TC003060	cuticle protein 19.8	; cuticle protein 19.8|AUGUSTUS-3.0.2_03060|GLEAN_03060
48	LOC103312414	12.7415	0.0123933	TcasGA2_TC003791	transcription factor Sox-10	; transcription factor Sox-10|AUGUSTUS-3.0.2_32549|GLEAN_03791|GLEAN_03792|Transcription factor Sox-8-like Protein
49	LOC103313378	12.7385	7.02932e-05	TcasGA2_TC015514	oocyte zinc finger protein XlCOF28	; oocyte zinc finger protein XlCOF28|AUGUSTUS-3.0.2_15514|GLEAN_15514|Zinc finger Y-chromosomal protein-like Protein
50	LOC107398128	12.5262	5.52541e-06		beta-1,4-glucuronyltransferase 1-like	; beta-1,4-glucuronyltransferase 1-like
51	LOC100141786	12.5182	5.36326e-07	TcasGA2_TC009372	uncharacterized LOC100141786	; uncharacterized LOC100141786|AUGUSTUS-3.0.2_33518|GLEAN_09372|GLEAN_09373
52	LOC656647	12.4641	6.8633e-05		coilin	; coilin|AUGUSTUS-3.0.2_06924|GLEAN_06924
53	LOC661132	12.3982	0.000575867		uncharacterized LOC661132	; uncharacterized protein LOC661132
54	LOC660485	12.3159	1.94009e-07	TcasGA2_TC015238	uncharacterized LOC660485	; similar to CG17600-PA, isoform A|uncharacterized protein LOC660485|AUGUSTUS-3.0.2_15238|GLEAN_15238
55	LOC662897	12.1397	7.73321e-08	TcasGA2_TC003174	probable medium-chain specific acyl-CoA dehydrogenase, mitochondrial	; probable medium-chain specific acyl-CoA dehydrogenase, mitochondrial|GLEAN_03174
56	Arr2	11.9364	0.000554327	TcasGA2_TC009551	arrestin 2	; arrestin 2|AUGUSTUS-3.0.2_09551
57	LOC663763	11.8215	0.00247561	TcasGA2_TC002935	dnaJ homolog subfamily C member 17	; dnaJ homolog subfamily C member 17|AUGUSTUS-3.0.2_02935|DnaJ homolog subfamily C member 17-like Protein|GLEAN_02935
58	Tomm7	11.7982	0.0376933	TcasGA2_TC015621, Tom7	translocase of outer mitochondrial membrane 7 homolog	; translocase of outer mitochondrial membrane 7 homolog|AUGUSTUS-3.0.2_15621|GLEAN_15621|Mitochondrial import receptor subunit TOM7 homolog-like Protein
59	LOC661661	11.7323	0.00259643	TcasGA2_TC004402	neuroendocrine convertase 1	; neuroendocrine convertase 1|AUGUSTUS-3.0.2_04402|Furin-like protease 1, isoforms 1/1-X/2|GLEAN_04402
60	LOC664182	11.5901	0.000113979	TcasGA2_TC008865	exosome complex component MTR3	; exosome complex component MTR3|AUGUSTUS-3.0.2_08865|Exosome complex component MTR3-like Protein|GLEAN_08865
61	LOC657093	11.5802	3.26678e-05	TcasGA2_TC003834	endocuticle structural glycoprotein SgAbd-2	; endocuticle structural glycoprotein SgAbd-2|AUGUSTUS-3.0.2_03834|GLEAN_03834|Pupal cuticle protein Edg-78E-like Protein
62	LOC655594	11.289	0.0469345	TcasGA2_TC003940	ataxin-3	; ataxin-3|AUGUSTUS-3.0.2_03940|Ataxin-3-like Protein|GLEAN_03940
63	LOC657673	11.2742	8.54741e-06	TcasGA2_TC011851	protein artemis	; protein artemis|similar to Artemis protein (DNA cross-link repair 1C protein)|AUGUSTUS-3.0.2_11851|GLEAN_11851|Protein artemis-like Protein
64	LOC659509	11.0172	4.00525e-07	TcasGA2_TC002652	NF-X1-type zinc finger protein NFXL1	; NF-X1-type zinc finger protein NFXL1|GLEAN_02652
65	LOC103313956	10.8583	0.019845	TcasGA2_TC006394	hypothetical protein	; uncharacterized protein LOC103313956|AUGUSTUS-3.0.2_06394|GLEAN_06394
66	LOC100141687	10.856	1.69933e-06	TcasGA2_TC014548	uncharacterized LOC100141687	; uncharacterized protein LOC100141687|GLEAN_14548|GLEAN_14549
67	LOC657001	10.7006	5.25039e-06	TcasGA2_TC011462, GLEAN_11462, Syt4, SytIV	synaptotagmin IV	; synaptotagmin-11|AUGUSTUS-3.0.2_11462|synaptotagmin 4
68	LOC100141949	10.4676	0.00338445	TcasGA2_TC006020	Meckel syndrome type 1 protein	; Meckel syndrome type 1 protein|AUGUSTUS-3.0.2_06020|GLEAN_06020|Meckel syndrome type 1 protein-like Protein
69	LOC661436	10.4422	0.00320359	TcasGA2_TC006580	enhancer of split mgamma protein	; enhancer of split mgamma protein|AUGUSTUS-3.0.2_06580|Enhancer of split mgamma protein-like Protein|GLEAN_06580
70	LOC100141808	10.4334	0.0124429	TcasGA2_TC012298	uncharacterized LOC100141808	; uncharacterized protein LOC100141808|AUGUSTUS-3.0.2_12298|GLEAN_12298
71	LOC660489	10.3011	0.000624637	TcasGA2_TC014867	zinc finger protein 675	; similar to zinc finger protein 91|zinc finger protein 675|AUGUSTUS-3.0.2_14867|GLEAN_14867|Zinc finger protein 91-like Protein|zinc finger protein 90
72	LOC103314695	10.2714	0.00568596	TcasGA2_TC000129	zinc finger protein 142	; zinc finger protein 142|AUGUSTUS-3.0.2_00129|GLEAN_00129|Zinc finger protein 142-like Protein
73	LOC656286	10.1799	0.00328332	TcasGA2_TC005579	protein atonal homolog 8	; protein atonal homolog 8|AUGUSTUS-3.0.2_05579|GLEAN_05579
74	LOC103313652	10.1351	1.66827e-09		protein FAM43A	; protein FAM43A|AUGUSTUS-3.0.2_02099|GLEAN_02099
75	LOC103312554	10.063	0.00134442	TcasGA2_TC002812	uncharacterized LOC103312554	; LOW QUALITY PROTEIN: uncharacterized protein LOC103312554|AUGUSTUS-3.0.2_02812|GLEAN_02812
76	LOC103313615	9.95627	0.00256914		uncharacterized LOC103313615	; uncharacterized protein LOC103313615
77	LOC103315180	9.94177	0.000168694		receptor-type tyrosine-protein phosphatase epsilon	; receptor-type tyrosine-protein phosphatase epsilon|GLEAN_02380
78	LOC660366	9.69737	1.99262e-05	TcasGA2_TC014868	ataxin-2 homolog	; ataxin-2 homolog|AUGUSTUS-3.0.2_14868|GLEAN_14868
79	LOC655858	9.6582	0.00150183	TcasGA2_TC014483	cell division cycle protein 23 homolog	; cell division cycle protein 23 homolog|GLEAN_14483
80	Tup	9.58913	0.00565388	TcasGA2_TC009338	tailup	; tailup|AUGUSTUS-3.0.2_33536|GLEAN_09338|GLEAN_09339|Protein lin-11-like Protein
81	LOC103313913	9.55471	0.000948824	TcasGA2_TC006285	uncharacterized LOC103313913	; uncharacterized protein LOC103313913|AUGUSTUS-3.0.2_06285|GLEAN_06285
82	LOC662831	9.53094	0.00045659	TcasGA2_TC006255, serpin24	serpin peptidase inhibitor 24	; antichymotrypsin-2|AUGUSTUS-3.0.2_06255|GLEAN_06255
83	LOC661222	9.40957	0.00388951	TcasGA2_TC005844	suppressor of cytokine signaling 2	; suppressor of cytokine signaling 2|AUGUSTUS-3.0.2_05844|GLEAN_05844|Suppressor of cytokine signaling 2-like Protein
84	LOC655196	9.39264	1.30585e-09	TcasGA2_TC008230	cuticle protein 63	; cuticle protein 63|GLEAN_08230|glycine-rich protein
85	H	9.32458	0.00121635	TcasGA2_TC012851	hairy	; hairy|AUGUSTUS-3.0.2_12851|GLEAN_12851|Protein hairy-like Protein
86	LOC660034	9.31623	0.0156603	TcasGA2_TC003445	E3 ubiquitin-protein ligase RFWD3	; E3 ubiquitin-protein ligase RFWD3|AUGUSTUS-3.0.2_03445|E3 ubiquitin-protein ligase RFWD3-like Protein|GLEAN_03445
87	LOC657175	9.27839	0.000664777	TcasGA2_TC003835	endocuticle structural glycoprotein SgAbd-8	; endocuticle structural glycoprotein SgAbd-8|AUGUSTUS-3.0.2_03835|GLEAN_03835|Pupal cuticle protein Edg-78E-like Protein
88	LOC655597	9.19934	1.4599e-08	TcasGA2_TC007505	gamma-sarcoglycan	; gamma-sarcoglycan|AUGUSTUS-3.0.2_32792|GLEAN_07505|Gamma-sarcoglycan-like Protein
89	Mlpt	9.16378	0.00207913		mille-pattes	; mille-pattes|mlpt peptide|tarsal-less
90	LOC107398052	9.10435	0.0196232		transmembrane protein 64	; transmembrane protein 64
91	LOC103314860	9.10348	0.000702858		hypothetical protein	; uncharacterized protein LOC103314860|AUGUSTUS-3.0.2_02356|GLEAN_02356
92	LOC655282	9.10157	8.95786e-05	TcasGA2_TC015179	spermidine synthase	; spermidine synthase|AUGUSTUS-3.0.2_15179|GLEAN_15179|Spermidine synthase-like Protein
93	LOC103312258	9.01053	0.000765129	TcasGA2_TC003120	hypothetical protein	; uncharacterized protein LOC103312258|AUGUSTUS-3.0.2_03120|GLEAN_03120
94	LOC659096	9.00376	1.91089e-06	TcasGA2_TC015471	uncharacterized LOC659096	; uncharacterized protein LOC659096|AUGUSTUS-3.0.2_15471|GLEAN_15471
95	LOC107397807	8.97086	4.10235e-06		probable DNA polymerase	; probable DNA polymerase
96	LOC658775	8.93666	0.00304942	TcasGA2_TC011477	inverted formin-2	; inverted formin-2|AUGUSTUS-3.0.2_11477|GLEAN_11477
97	LOC103312310	8.88338	0.00116469	TcasGA2_TC003005	muscle M-line assembly protein unc-89	; muscle M-line assembly protein unc-89|AUGUSTUS-3.0.2_03005|GLEAN_03005
98	LOC662610	8.8816	6.63296e-05	TcasGA2_TC015203	putative fatty acyl-CoA reductase CG5065	; putative fatty acyl-CoA reductase CG5065|AUGUSTUS-3.0.2_15203|GLEAN_15203|Putative fatty acyl-CoA reductase CG5065-like Protein
99	LOC655183	8.83199	0.0232609	TcasGA2_TC003363	cuticle protein	; cuticle protein|AUGUSTUS-3.0.2_03363|GLEAN_03363|Pro-resilin-like Protein
100	LOC103312139	8.73082	0.0018656	TcasGA2_TC004494	major facilitator superfamily domain-containing protein 6-A	; major facilitator superfamily domain-containing protein 6-A|GLEAN_04494
101	LOC658555	8.71738	0.0139104	TcasGA2_TC004656	phospholipase A1	; phospholipase A1|AUGUSTUS-3.0.2_04656|GLEAN_04656|Vitellogenin-3-like Protein
102	LOC663583	8.65691	1.97372e-06	TcasGA2_TC008489	replication factor C subunit 4	; replication factor C subunit 4|AUGUSTUS-3.0.2_08489|GLEAN_08489|Replication factor C subunit 2-like Protein
103	LOC107397779	8.63463	0.00114273		uncharacterized LOC107397779
104	LOC660800	8.62498	1.1025e-05	TcasGA2_TC000046	mitochondrial import inner membrane translocase subunit Tim13	; mitochondrial import inner membrane translocase subunit Tim13|AUGUSTUS-3.0.2_00046|GLEAN_00046|Mitochondrial import inner membrane translocase subunit Tim13-like Protein
105	LOC663690	8.61508	3.14127e-05	TcasGA2_TC033237	hypothetical protein	; uncharacterized protein LOC663690|AUGUSTUS-3.0.2_33237
106	LOC100141570	8.60232	0.030799	TcasGA2_TC030551	biogenesis of lysosome-related organelles complex 1 subunit 2	; biogenesis of lysosome-related organelles complex 1 subunit 2|NONGLEAN-OG23703
107	LOC107397979	8.51738	0.0251148		gastrula zinc finger protein XlCGF26.1-like	; gastrula zinc finger protein XlCGF26.1-like
108	LOC657696	8.47277	0.00902361	TcasGA2_TC031645	skin secretory protein xP2-like	; skin secretory protein xP2-like|AUGUSTUS-3.0.2_31645
109	LOC103313831	8.36729	0.0046183	TcasGA2_TC008698	uncharacterized LOC103313831	; uncharacterized protein LOC103313831|AUGUSTUS-3.0.2_08698|GLEAN_08698
110	LOC662561	8.27972	0.000713811	TcasGA2_TC005447	protein KIAA0100	; protein KIAA0100|AUGUSTUS-3.0.2_05447|GLEAN_05447|UPF0378 protein KIAA0100-like Protein
111	LOC103314280	8.27048	0.00150462	TcasGA2_TC034406	uncharacterized LOC103314280	; uncharacterized protein LOC103314280|AUGUSTUS-3.0.2_34406
112	LOC662854	8.16198	1.86486e-06	TcasGA2_TC009647	E3 SUMO-protein ligase PIAS2	; E3 SUMO-protein ligase PIAS2|E3 SUMO-protein ligase PIAS1-like Protein|GLEAN_09647
113	LOC659996	8.1341	9.79294e-07	TcasGA2_TC009723	transmembrane protein 50A	; transmembrane protein 50A|AUGUSTUS-3.0.2_09723|GLEAN_09723|Transmembrane protein 50B-like Protein
114	LOC661603	8.10371	0.00832121	TcasGA2_TC033566	CWF19-like protein 1	; CWF19-like protein 1|AUGUSTUS-3.0.2_33566|CWF19-like protein 1 homolog
115	LOC103313960	8.089	7.148e-05	TcasGA2_TC034065	CD59 glycoprotein-like	; CD59 glycoprotein-like|AUGUSTUS-3.0.2_34065
116	LOC659610	8.07013	0.00445057	TcasGA2_TC000057	WW domain-binding protein 11	; WW domain-binding protein 11|AUGUSTUS-3.0.2_00057|GLEAN_00057
117	LOC655454	8.04664	0.0109647	TcasGA2_TC009777	hypothetical protein	; uncharacterized protein LOC655454|GLEAN_09777
118	LOC655624	8.03952	0.00071103	TcasGA2_TC012410	conserved oligomeric Golgi complex subunit 3	; conserved oligomeric Golgi complex subunit 3|AUGUSTUS-3.0.2_12410|Conserved oligomeric Golgi complex subunit 3-like Protein|GLEAN_12410
119	LOC656761	7.98515	0.00479732	TcasGA2_TC013706	integrin beta-PS	; integrin beta-PS|AUGUSTUS-3.0.2_13706|GLEAN_13706|Integrin beta-PS-like Protein
120	LOC659295	7.94223	4.38228e-05	TcasGA2_TC004969	target of rapamycin complex 2 subunit MAPKAP1	; target of rapamycin complex 2 subunit MAPKAP1|AUGUSTUS-3.0.2_04969|GLEAN_04969|Target of rapamycin complex 2 subunit MAPKAP1-like Protein
121	LOC103313886	7.89856	0.0116167	TcasGA2_TC006257	transcription factor E4F1	; transcription factor E4F1|AUGUSTUS-3.0.2_06257|GLEAN_06257
122	LOC658992	7.89745	2.98803e-07	TcasGA2_TC011388, Dctn4, p62	dynactin subunit 4	; dynactin subunit 4|AUGUSTUS-3.0.2_11388|Dynactin subunit 4-like Protein|GLEAN_11388
123	LOC107397511	7.80288	0.00570464		supervillin	; supervillin
124	Csp12	7.78907	0.00322993	TcasGA2_TC008680, CSP09, ORF2, TcCSP7L, TcasCSP12	chemosensory protein 12	; chemosensory protein 12|GLEAN_08680|chemosensory protein 9
125	LOC663346	7.76449	2.07599e-05	TcasGA2_TC003168	chromosome transmission fidelity protein 8 homolog	; chromosome transmission fidelity protein 8 homolog|Chromosome transmission fidelity protein 8 homolog-like Protein|GLEAN_03168
126	LOC657244	7.74078	0.0145587	TcasGA2_TC001104	cullin-5	; cullin-5|AUGUSTUS-3.0.2_01104|Cullin homolog 1-like Protein|GLEAN_01104
127	LOC664565	7.73102	3.95264e-08	TcasGA2_TC008222	CREB-binding protein	; CREB-binding protein|AUGUSTUS-3.0.2_08222|CREB-binding protein-like Protein|GLEAN_08222
128	LOC103315208	7.71915	0.000241168	TcasGA2_TC000461	major facilitator superfamily domain-containing protein 6	; major facilitator superfamily domain-containing protein 6|AUGUSTUS-3.0.2_00461|GLEAN_00461|Major facilitator superfamily domain-containing protein 6-like Protein
129	LOC658137	7.71396	0	TcasGA2_TC009602, P96	brachyurin	; brachyurin|AUGUSTUS-3.0.2_09602|GLEAN_09602|serine protease P96
130	LOC661777	7.7077	0.0238984	TcasGA2_TC005533	uncharacterized LOC661777	; uncharacterized protein LOC661777|AUGUSTUS-3.0.2_05533|AUGUSTUS-3.0.2_05534|GLEAN_05533|GLEAN_05534
131	LOC103312333	7.63091	0.00460907	TcasGA2_TC002964	hypothetical protein	; uncharacterized protein LOC103312333|AUGUSTUS-3.0.2_02964|AUGUSTUS-3.0.2_32391|GLEAN_02964
132	LOC661407	7.60199	0.00176033	TcasGA2_TC011256	kanadaptin	; kanadaptin|AUGUSTUS-3.0.2_11256|GLEAN_11256|Kanadaptin-like Protein
133	LOC103312378	7.58662	0.00057171	TcasGA2_TC002739	protein Simiate	; protein Simiate|AUGUSTUS-3.0.2_31044|FAM206 family protein CG9288-like Protein|GLEAN_02739|protein FAM206A
134	LOC660440	7.55136	5.27985e-05	TcasGA2_TC012027	retinol dehydrogenase 14	; retinol dehydrogenase 14|AUGUSTUS-3.0.2_12027|GLEAN_12027|WW domain-containing oxidoreductase-like Protein
135	LOC103313333	7.53635	0.0384991		unconventional myosin-XVIIIa	; unconventional myosin-XVIIIa|GLEAN_15276|GLEAN_15277
136	LOC660698	7.53032	0.000435701	TcasGA2_TC011242	ATP-dependent RNA helicase DDX54	; ATP-dependent RNA helicase DDX54|GLEAN_11242
137	LOC103313291	7.49797	0.000454752	TcasGA2_TC015360	zinc finger protein 33B	; zinc finger protein 33B|AUGUSTUS-3.0.2_34714|GLEAN_15360
138	LOC107397709	7.4687	0.0118599		uncharacterized LOC107397709
139	LOC656475	7.38749	9.02614e-07	TcasGA2_TC001573	RNA polymerase-associated protein Rtf1	; RNA polymerase-associated protein Rtf1|AUGUSTUS-3.0.2_01573|GLEAN_01573|RNA polymerase-associated protein Rtf1-like Protein
140	LOC660387	7.37449	0.000807075	TcasGA2_TC010377	uncharacterized protein C7orf26	; uncharacterized protein C7orf26|AUGUSTUS-3.0.2_10377|GLEAN_10377
141	LOC103313611	7.35895	0.0241951	TcasGA2_TC030549	protein-cysteine N-palmitoyltransferase Rasp	; protein-cysteine N-palmitoyltransferase Rasp|AUGUSTUS-3.0.2_30549|NONGLEAN-OG8570|Protein-cysteine N-palmitoyltransferase Rasp-like Protein
142	LOC655586	7.35154	0.00580127	TcasGA2_TC001291, LMX-HD, Lmx1b	LIM homeobox transcription factor 1-beta.1	; LIM homeobox transcription factor 1-beta|LIM homeobox transcription factor 1-beta.1|AUGUSTUS-3.0.2_01291|GLEAN_01291|LIM homeobox transcription factor 1, beta
143	LOC659585	7.32362	3.03278e-06	TcasGA2_TC014816	beta carbonic anhydrase 1	; beta carbonic anhydrase 1|GLEAN_14816
144	LOC658666	7.20913	0.000914412	TcasGA2_TC013308	tryptophan--tRNA ligase, mitochondrial	; tryptophan--tRNA ligase, mitochondrial|AUGUSTUS-3.0.2_13308|GLEAN_13308|Tryptophan--tRNA ligase, mitochondrial-like Protein
145	LOC658039	7.1895	0.0160137	TcasGA2_TC013998	serine/Arginine-related protein 53	; serine/Arginine-related protein 53|AUGUSTUS-3.0.2_13998|GLEAN_13998
146	LOC100142352	7.17966	0.000174099	TcasGA2_TC012247	uncharacterized LOC100142352	; similar to AGAP011875-PA|uncharacterized protein LOC100142352|AUGUSTUS-3.0.2_12247|GLEAN_12247
147	LOC657116	7.15384	0.000952866	TcasGA2_TC006102	vacuolar protein sorting-associated protein 33A	; vacuolar protein sorting-associated protein 33A|AUGUSTUS-3.0.2_06102|GLEAN_06102|Vacuolar protein sorting-associated protein 33A-like Protein
148	LOC655539	7.14829	0.00384412	TcasGA2_TC006060	uncharacterized LOC655539	; uncharacterized protein LOC655539|AUGUSTUS-3.0.2_06060|AUGUSTUS-3.0.2_06061|GLEAN_06060|GLEAN_06061
149	LOC662779	7.14745	0.00794995	TcasGA2_TC005758	pseudouridylate synthase 7 homolog	; pseudouridylate synthase 7 homolog|AUGUSTUS-3.0.2_05758|GLEAN_05758|Pseudouridylate synthase 7 homolog-like Protein
150	LOC659059	7.04551	0.000550996		probable tyrosyl-DNA phosphodiesterase	; probable tyrosyl-DNA phosphodiesterase|AUGUSTUS-3.0.2_01393|GLEAN_01393|putative tyrosyl-DNA phosphodiesterase-like Protein
151	LOC655000	7.01074	0.00975232	TcasGA2_TC015802	solute carrier family 35 member G1	; solute carrier family 35 member G1|AUGUSTUS-3.0.2_15802|GLEAN_15802|Solute carrier family 35 member G1-like Protein
152	LOC659863	6.98886	0.00164723	TcasGA2_TC010127	titin	; titin|uncharacterized protein LOC659863|AUGUSTUS-3.0.2_10127|GLEAN_10127
153	LOC103314437	6.98472	0.00592536		protein lap4-like	; protein lap4-like
154	LOC103313916	6.9463	0.000288175		uncharacterized LOC103313916
155	LOC657362	6.94083	1.08313e-08	TcasGA2_TC012528	inactive pancreatic lipase-related protein 1	; inactive pancreatic lipase-related protein 1|AUGUSTUS-3.0.2_12528|GLEAN_12528|Inactive pancreatic lipase-related protein 1-like Protein
156	LOC662157	6.92467	0.000218012	TcasGA2_TC015585	bifunctional transcriptional activator/DNA repair enzyme Ada	; bifunctional transcriptional activator/DNA repair enzyme Ada|AUGUSTUS-3.0.2_15585|Bifunctional transcriptional activator/DNA repair enzyme Ada-like Protein|GLEAN_15585|methylated-DNA--protein-cysteine methyltransferase
157	LOC658678	6.89117	0.00358677		p53 and DNA damage-regulated protein 1	; p53 and DNA damage-regulated protein 1
158	nAChRa6	6.83904	0.0350687	TcasGA2_TC013633, AChRA6	nicotinic acetylcholine receptor alpha 6 subunit	; nicotinic acetylcholine receptor alpha6 subunit|AUGUSTUS-3.0.2_13633|GLEAN_13633|nAChR subunit alpha6|nicotinic acetylcholine receptor subunit a6|nicotinic acetylcholine receptor subunit alpha6
159	LOC657594	6.81996	0.0225385	TcasGA2_TC034455	equilibrative nucleoside transporter 3-like	; equilibrative nucleoside transporter 3-like|AUGUSTUS-3.0.2_34455|Equilibrative nucleoside transporter 3-like Protein
160	LOC656533	6.80838	0.000369649	TcasGA2_TC005824	uncharacterized LOC656533	; uncharacterized protein LOC656533|AUGUSTUS-3.0.2_05824|GLEAN_05824
161	LOC662836	6.80536	0.00909923	TcasGA2_TC011794	NCK-interacting protein with SH3 domain	; NCK-interacting protein with SH3 domain|AUGUSTUS-3.0.2_11794|GLEAN_11794|NCK-interacting protein with SH3 domain-like Protein
162	LOC654921	6.80296	8.28226e-14	TcasGA2_TC008226	cuticle protein 64	; cuticle protein 64|GLEAN_08226
163	LOC661058	6.80146	0.000271543	TcasGA2_TC009260	40S ribosomal protein S12	; 40S ribosomal protein S12|40S ribosomal protein S12-like Protein|AUGUSTUS-3.0.2_09260|GLEAN_09260
164	LOC107398511	6.80082	0.00640323		aldose reductase-like	; aldose reductase-like
165	Ems	6.75283	0.00950196	TcasGA2_TC011763	empty spiracles	; empty spiracles|AUGUSTUS-3.0.2_11763|GLEAN_11763
166	LOC656274	6.74599	0.00432246	TcasGA2_TC015538	enhancer of rudimentary homolog	; enhancer of rudimentary homolog|GLEAN_15538|Protein enhancer of rudimentary-like Protein
167	LOC662426	6.74084	0.000150007	TcasGA2_TC010771	uncharacterized LOC662426	; uncharacterized protein LOC662426|AUGUSTUS-3.0.2_10771|GLEAN_10771
168	LOC656219	6.72102	0.0278496		uncharacterized LOC656219	; uncharacterized protein LOC656219|AUGUSTUS-3.0.2_08531|GLEAN_08531
169	LOC655583	6.71114	0.000344666	TcasGA2_TC011074	death-associated small cytoplasmic leucine-rich protein SCLP	; leucine-rich repeat protein soc-2|plant intracellular Ras-group-related LRR protein 2|AUGUSTUS-3.0.2_11074|AUGUSTUS-3.0.2_11075|GLEAN_11074|GLEAN_11075|Protein flightless-1-like Protein
170	LOC103314892	6.70526	0.000252279		uncharacterized LOC103314892	; uncharacterized protein LOC103314892
171	LOC100141521	6.64686	0.00332147	TcasGA2_TC012556	uncharacterized LOC100141521	; uncharacterized protein LOC100141521|AUGUSTUS-3.0.2_12556|GLEAN_12556
172	LOC658267	6.62476	1.54184e-05	TcasGA2_TC000328, sra	sarah	; protein sarah|AUGUSTUS-3.0.2_00328|GLEAN_00328
173	LOC661119	6.60391	0.00574692	TcasGA2_TC012455, Dctn1, Gl, p150	dynactin subunit 1	; dynactin subunit 1|AUGUSTUS-3.0.2_12455|Dynactin subunit 1-like Protein|GLEAN_12455|glued
174	LOC100142155	6.55863	1.6556e-05	TcasGA2_TC014629	uncharacterized LOC100142155	; uncharacterized protein LOC100142155|GLEAN_14629
175	LOC100141965	6.52922	0.00113602	TcasGA2_TC031553	keratin, type I cytoskeletal 10-like	; keratin, type I cytoskeletal 10-like|AUGUSTUS-3.0.2_31553
176	LOC655332	6.52766	0.0114411	TcasGA2_TC011185	protein ENL	; protein ENL|AUGUSTUS-3.0.2_11185|GLEAN_11185
177	LOC103313392	6.48222	0.0204926	TcasGA2_TC015099, H152	collagenase	; collagenase|AUGUSTUS-3.0.2_15099|GLEAN_15099|serine protease H152
178	LOC662829	6.44927	0.000325224	TcasGA2_TC008993	metastasis suppressor protein 1	; MTSS1-like protein|metastasis suppressor protein 1|mucin-12|uncharacterized protein PB18E9.04c|AUGUSTUS-3.0.2_08993|GLEAN_08993
179	LOC655078	6.42086	0.00885504	TcasGA2_TC012236, GLEAN_12236	uncharacterized protein LOC655078	; uncharacterized protein LOC655078|AUGUSTUS-3.0.2_34854
180	LOC654943	6.40637	5.86225e-08	TcasGA2_TC006182	protein msta, isoform B	; protein msta, isoform B|AUGUSTUS-3.0.2_33983|GLEAN_06182
181	LOC663043	6.39118	2.60493e-05	TcasGA2_TC013382	protein smg8	; protein smg8|similar to CG6729-PA|GLEAN_13382
182	LOC664382	6.38583	9.57565e-11	TcasGA2_TC000639	pro-resilin	; pro-resilin|AUGUSTUS-3.0.2_30993|GLEAN_00639
183	LOC103313027	6.38243	0.00177731	TcasGA2_TC014180	UPF0518 protein AGAP011705	; UPF0518 protein AGAP011705|AUGUSTUS-3.0.2_14180|GLEAN_14180|UPF0518 protein CG3558-like Protein
184	LOC659916	6.36106	0.00861475	TcasGA2_TC007625	coiled-coil domain-containing protein 85C	; coiled-coil domain-containing protein 85C|AUGUSTUS-3.0.2_07625|Coiled-coil domain-containing protein 85C-like Protein|GLEAN_07625
185	LOC661591	6.34491	0.00501488	TcasGA2_TC014234	regulator of G-protein signaling 17	; regulator of G-protein signaling 17|AUGUSTUS-3.0.2_31508|GLEAN_14234|Regulator of G-protein signaling 20-like Protein
186	LOC656619	6.31822	2.91846e-05	TcasGA2_TC005493	uncharacterized LOC656619	; uncharacterized protein LOC656619|AUGUSTUS-3.0.2_05493|GLEAN_05493
187	LOC660856	6.31069	0.0216792	TcasGA2_TC004360	coiled-coil domain-containing protein 12	; coiled-coil domain-containing protein 12|AUGUSTUS-3.0.2_04360|Coiled-coil domain-containing protein 12-like Protein|GLEAN_04360
188	LOC103312832	6.29512	0.0261984	TcasGA2_TC010590	hypothetical protein	; uncharacterized protein LOC103312832|AUGUSTUS-3.0.2_10590|GLEAN_10590
189	LOC664554	6.27529	0.0209955	TcasGA2_TC007250	interference hedgehog	; interference hedgehog|AUGUSTUS-3.0.2_07250|GLEAN_07250|Interference hedgehog-like Protein
190	LOC661294	6.27385	0.0341742	TcasGA2_TC004396	uncharacterized LOC661294	; uncharacterized protein LOC661294|AUGUSTUS-3.0.2_04396|GLEAN_04396
191	LOC662541	6.27098	0.00666905	TcasGA2_TC007044, Grem1	gremlin 1	; cerberus|uncharacterized protein LOC662541|AUGUSTUS-3.0.2_07044|GLEAN_07044
192	LOC103313525	6.26698	0.00290684	TcasGA2_TC033547	uncharacterized LOC103313525	; uncharacterized protein LOC103313525|AUGUSTUS-3.0.2_33547
193	LOC662096	6.26188	0.000661554	TcasGA2_TC006365	coiled-coil-helix-coiled-coil-helix domain-containing protein 10, mitochondrial	; coiled-coil-helix-coiled-coil-helix domain-containing protein 10, mitochondrial|AUGUSTUS-3.0.2_06365|GLEAN_06365
194	LOC657102	6.24004	2.35367e-13	TcasGA2_TC014091	probable multidrug resistance-associated protein lethal(2)03659	; probable multidrug resistance-associated protein lethal(2)03659|AUGUSTUS-3.0.2_14091|GLEAN_14091|putative multidrug resistance-associated protein lethal(2)03659-like Protein
195	LOC657302	6.20006	0.000366563	TcasGA2_TC004151	protein hook	; protein hook|AUGUSTUS-3.0.2_04151|GLEAN_04151|Protein hook-like Protein
196	LOC660060	6.19727	0.00130132	TcasGA2_TC005796, lz	lozenge	; runt-related transcription factor 3|AUGUSTUS-3.0.2_34050|GLEAN_05796|GLEAN_05797|Protein lozenge-like Protein
197	LOC659757	6.18848	0.000170342	TcasGA2_TC031695, GFI1	zinc finger protein Gfi-1	; zinc finger protein 182|zinc finger protein Gfi-1|AUGUSTUS-3.0.2_31695|GLEAN_12905|GLEAN_12906|Zinc finger protein Gfi-1-like Protein|growth factor independent 1 transcription repressor
198	LOC654924	6.09601	0.00501087	TcasGA2_TC013723	protein big brother	; protein big brother|AUGUSTUS-3.0.2_13723|GLEAN_13723|Protein big brother-like Protein
199	LOC658467	6.08588	1.23648e-08	CYP6BK10	cytochrome P450 6BK10	; cytochrome P450 6a2|GLEAN_10243
200	LOC661101	6.07442	0.0124927	TcasGA2_TC015323	serine/threonine-protein kinase BRSK2	; serine/threonine-protein kinase BRSK2|AUGUSTUS-3.0.2_15323|GLEAN_15323|Serine/threonine-protein kinase BRSK2-like Protein
201	LOC107398365	6.07422	0.0112226	TcasGA2_TC032005	uncharacterized LOC107398365	; uncharacterized protein LOC107398365|AUGUSTUS-3.0.2_32005
202	LOC103312575	6.06626	2.24266e-08	TcasGA2_TC032785	lamin-B receptor-like	; lamin-B receptor-like|AUGUSTUS-3.0.2_32785|Lamin-B receptor-like Protein
203	LOC107397398	6.06319	0.0356444		vitelline membrane protein Vm26Ab-like	; vitelline membrane protein Vm26Ab-like
204	LOC103312395	6.02923	0.00240863		folate-like transporter 3	; folate-like transporter 3
205	LOC657808	6.02362	0	TcasGA2_TC014771	endocuticle structural glycoprotein SgAbd-8	; endocuticle structural glycoprotein SgAbd-8|GLEAN_14771
206	LOC659258	6.0196	0.048703	TcasGA2_TC006035	protein suppressor of sable	; protein suppressor of sable|AUGUSTUS-3.0.2_34819|GLEAN_06035
207	LOC656782	6.00998	0.0235849	TcasGA2_TC006632	putative inorganic phosphate cotransporter	; putative inorganic phosphate cotransporter|AUGUSTUS-3.0.2_34141|GLEAN_06632|Putative inorganic phosphate cotransporter-like Protein
208	LOC100141886	6.0002	0.0336304	TcasGA2_TC000315	protein fem-1 homolog CG6966	; protein fem-1 homolog CG6966|AUGUSTUS-3.0.2_00315|GLEAN_00315|Protein fem-1 homolog CG6966-like Protein
209	LOC103313771	5.99124	0.00181819	TcasGA2_TC006056	protein CASC1-like	; protein CASC1-like|AUGUSTUS-3.0.2_06056
210	LOC658068	5.9904	0.0406093	TcasGA2_TC011849	sterol O-acyltransferase 1	; sterol O-acyltransferase 1|AUGUSTUS-3.0.2_11849|GLEAN_11849|Sterol O-acyltransferase 1-like Protein
211	LOC103313185	5.98721	0.000160119	TcasGA2_TC013247	transient receptor potential cation channel protein painless	; transient receptor potential cation channel protein painless|GLEAN_13247
212	LOC657560	5.93883	0.00546887	TcasGA2_TC032503, CYP6BK12	probable cytochrome P450 6a14	; probable cytochrome P450 6a14|AUGUSTUS-3.0.2_32503|GLEAN_03741|cytochrome P450 6BK12|putative cytochrome P450 6a14-like Protein
213	LOC663193	5.90899	0.00167434	TcasGA2_TC000836, FBN2	fibrillin-2	; fibrillin-2|AUGUSTUS-3.0.2_00836|Fibrillin-2-like Protein|GLEAN_00836
214	LOC103312538	5.90032	3.62756e-05	TcasGA2_TC007786	pericentriolar material 1 protein	; pericentriolar material 1 protein|AUGUSTUS-3.0.2_07786|GLEAN_07786
215	LOC664522	5.89983	5.56723e-05	TcasGA2_TC007290	ras-related protein Rab-32	; ras-related protein Rab-32|GLEAN_07290|GLEAN_07291
216	LOC663247	5.89633	0.00143195	TcasGA2_TC007684	integrator complex subunit 6	; integrator complex subunit 6|AUGUSTUS-3.0.2_07684|GLEAN_07684|Integrator complex subunit 6-A-like Protein
217	LOC103315258	5.88029	0.0143302	TcasGA2_TC001232	forkhead box protein N5	; forkhead box protein N5|uncharacterized protein LOC103315258|AUGUSTUS-3.0.2_01232|GLEAN_01232
218	LOC662720	5.87728	0.00472763	TcasGA2_TC011909	glutamate receptor-interacting protein 1	; glutamate receptor-interacting protein 1|AUGUSTUS-3.0.2_34397|GLEAN_11909|GLEAN_11910|Glutamate receptor-interacting protein 2-like Protein
219	LOC657953	5.86783	0.000440515	TcasGA2_TC003587	methylosome subunit pICln	; methylosome subunit pICln|AUGUSTUS-3.0.2_03587|GLEAN_03587|Methylosome subunit pICln-like Protein
220	Cht13	5.86444	0.0155327	TcasGA2_TC009628, TcCht13	chitinase 13	; chitinase 13|AUGUSTUS-3.0.2_33582|GLEAN_09628|putative chitinase 3-like Protein
221	LOC657011	5.8218	7.26468e-05	TcasGA2_TC003832	pupal cuticle protein 20	; pupal cuticle protein 20|AUGUSTUS-3.0.2_03832|Endocuticle structural glycoprotein SgAbd-2-like Protein|GLEAN_03832
222	LOC107397883	5.77799	0.00145467		uncharacterized LOC107397883
223	LOC655593	5.77359	0.00327631	TcasGA2_TC003839	tRNA-specific adenosine deaminase 1	; tRNA-specific adenosine deaminase 1|GLEAN_03839
224	LOC658769	5.76545	0.000548832	TcasGA2_TC004546	pupal cuticle protein 36	; pupal cuticle protein 36|AUGUSTUS-3.0.2_04546|Cuticle protein 3-like Protein|GLEAN_04546
225	LOC659824	5.75555	0.00444496		PHD finger protein rhinoceros	; PHD finger protein rhinoceros|AUGUSTUS-3.0.2_06853|GLEAN_06853
226	LOC654966	5.75069	0.00447288	TcasGA2_TC011400	uncharacterized LOC654966	; uncharacterized protein LOC654966|AUGUSTUS-3.0.2_31399|GLEAN_11400|GLEAN_11401
227	LOC660120	5.74545	0.0112696	TcasGA2_TC009369	NACHT domain- and WD repeat-containing protein 1	; NACHT domain- and WD repeat-containing protein 1|AUGUSTUS-3.0.2_09369|GLEAN_09369
228	LOC656557	5.71973	0.000288994	TcasGA2_TC010646	serine/threonine-protein phosphatase 2A 65 kDa regulatory subunit A alpha isoform	; serine/threonine-protein phosphatase 2A 65 kDa regulatory subunit A alpha isoform|AUGUSTUS-3.0.2_10646|GLEAN_10646|Serine/threonine-protein phosphatase PP2A 65 kDa regulatory subunit-like Protein
229	LOC663785	5.68827	0.00588336	TcasGA2_TC007672	tyrosine-protein phosphatase 10D	; tyrosine-protein phosphatase 10D|AUGUSTUS-3.0.2_07672|GLEAN_07672|Tyrosine-protein phosphatase 10D-like Protein
230	LOC658143	5.67501	0.000374325	TcasGA2_TC006331	hrp65 protein	; hrp65 protein|AUGUSTUS-3.0.2_06331|GLEAN_06331|Protein no-on-transient A-like Protein
231	LOC660198	5.65989	0.0149907	TcasGA2_TC011833	heparan sulfate glucosamine 3-O-sulfotransferase 5	; heparan sulfate glucosamine 3-O-sulfotransferase 5|AUGUSTUS-3.0.2_11833|Bifunctional heparan sulfate N-deacetylase/N-sulfotransferase-like Protein|GLEAN_11833|heparan sulfate glucosamine 3-O-sulfotransferase 1
232	LOC660759	5.65329	0.0077082	TcasGA2_TC000584	protein AAR2 homolog	; protein AAR2 homolog|AUGUSTUS-3.0.2_00584|GLEAN_00584|Protein AAR2 homolog-like Protein
233	LOC107397416	5.65232	7.84434e-07	Mgst3	microsomal glutathione S-transferase 1-like	; microsomal glutathione S-transferase 1-like|microsomal glutathione S-transferase-like protein
234	LOC100142493	5.62497	0.0065169	TcasGA2_TC014616	leucine-rich repeat-containing protein 15	; leucine-rich repeat-containing protein 15|GLEAN_14616
235	LOC663698	5.59146	6.0124e-05	TcasGA2_TC000531	myotubularin-related protein 2	; myotubularin-related protein 2|AUGUSTUS-3.0.2_00531|GLEAN_00531|Myotubularin-related protein 2-like Protein
236	Gr82	5.57195	5.54552e-05	TcasGA2_TC014088	gustatory receptor Gr82	; gustatory receptor Gr82|AUGUSTUS-3.0.2_14088|GLEAN_14088|Putative inorganic phosphate cotransporter-like Protein
237	LOC663650	5.5614	4.29615e-07	TcasGA2_TC002938	NFX1-type zinc finger-containing protein 1	; NFX1-type zinc finger-containing protein 1|AUGUSTUS-3.0.2_02938|GLEAN_02938
238	LOC103313143	5.54595	0.0332354		uncharacterized LOC103313143	; LOW QUALITY PROTEIN: uncharacterized protein LOC103313143
239	LOC663082	5.53538	0.00298362	TcasGA2_TC006708	ATP-sensitive inward rectifier potassium channel 11	; ATP-sensitive inward rectifier potassium channel 11|ATP-sensitive inward rectifier potassium channel 12-like Protein|AUGUSTUS-3.0.2_06708|GLEAN_06708
240	Cpap1-i	5.49707	4.19522e-09	TcasGA2_TC012766, CG13643	cuticular protein analogous to peritrophins 1-I	; cuticular protein analogous to peritrophins 1-I|AUGUSTUS-3.0.2_12766|GLEAN_12766
241	LOC107397947	5.48251	0.000153161	TcasGA2_TC034687	sodium-coupled monocarboxylate transporter 1-like	; sodium-coupled monocarboxylate transporter 1-like|AUGUSTUS-3.0.2_34687|Putative sodium-dependent multivitamin transporter-like protein
242	LOC662992	5.47057	5.07216e-05	TcasGA2_TC015510	BRCA1-associated protein	; BRCA1-associated protein|AUGUSTUS-3.0.2_15510|BRCA1-associated protein-like Protein|GLEAN_15510
243	LOC100142459	5.46344	0	TcasGA2_TC014800	solute carrier family 12 member 9	; solute carrier family 12 member 9|GLEAN_14800|GLEAN_14801-OG2550
244	LOC663440	5.4531	0.00156025	TcasGA2_TC013114	endothelin-converting enzyme 1	; endothelin-converting enzyme 1|GLEAN_13114
245	LOC664379	5.43871	0.0394337	TcasGA2_TC000935	high-affinity choline transporter 1	; LOW QUALITY PROTEIN: high-affinity choline transporter 1|AUGUSTUS-3.0.2_00935|GLEAN_00935|High-affinity choline transporter 1-like Protein
246	LOC658459	5.43684	2.46845e-05	TcasGA2_TC010901	protein unzipped	; protein unzipped|AUGUSTUS-3.0.2_10901|GLEAN_10901|Protein unzipped-like Protein
247	LOC103314074	5.43605	0.00284032	TcasGA2_TC005502	hypothetical protein	; uncharacterized protein LOC103314074|AUGUSTUS-3.0.2_05502|GLEAN_05502
248	LOC659397	5.43048	3.38424e-05	TcasGA2_TC009376	guanine nucleotide exchange factor subunit Rich	; guanine nucleotide exchange factor subunit Rich|AUGUSTUS-3.0.2_09376|GLEAN_09376|Protein RIC1 homolog-like Protein|protein RIC1 homolog
249	LOC100141909	5.43032	0.0293923	TcasGA2_TC000086	fibrillin-2	; fibrillin-2|AUGUSTUS-3.0.2_00086|Fibrillin-1-like Protein|GLEAN_00086
250	LOC664175	5.38539	0.00260353		netrin receptor UNC5C	; netrin receptor UNC5C
251	LOC103314737	5.36783	0.0122687		uncharacterized LOC103314737
252	LOC656609	5.36782	0.00409132	TcasGA2_TC015816	uncharacterized LOC656609	; uncharacterized protein LOC656609|AUGUSTUS-3.0.2_15816|GLEAN_15816
253	LOC103313351	5.36016	0.00696422	TcasGA2_TC015446	hypothetical protein	; uncharacterized protein LOC103313351|AUGUSTUS-3.0.2_15446|GLEAN_15446
254	LOC664483	5.35369	9.64398e-09	TcasGA2_TC007310, CYP6BQ1	cytochrome P450 6A1	; cytochrome P450 6A1|AUGUSTUS-3.0.2_07310|GLEAN_07310|cytochrome P450 6BQ1
255	LOC661389	5.30654	2.15383e-14	Syt15	synaptotagmin 15	; synaptotagmin-15|AUGUSTUS-3.0.2_34106|GLEAN_05622|GLEAN_05625|Synaptotagmin-15-like Protein
256	LOC656927	5.30569	0	TcasGA2_TC002483	coiled-coil domain-containing protein 86	; coiled-coil domain-containing protein 86|AP2-associated protein kinase 1|AUGUSTUS-3.0.2_02483|GLEAN_02483
257	LOC103312943	5.29073	0.0261745	TcasGA2_TC034686	uncharacterized LOC103312943	; uncharacterized protein LOC103312943|AUGUSTUS-3.0.2_34686
258	LOC656663	5.28292	0.000106186	TcasGA2_TC000618	protein polybromo-1	; protein polybromo-1|AUGUSTUS-3.0.2_00618|GLEAN_00618|Protein polybromo-1-like Protein
259	LOC100141695	5.28029	0.000319076		uncharacterized LOC100141695	; LOW QUALITY PROTEIN: uncharacterized protein LOC100141695
260	LOC657622	5.27941	0.000894183	TcasGA2_TC001592	tripeptidyl-peptidase 2	; tripeptidyl-peptidase 2|AUGUSTUS-3.0.2_34512|GLEAN_01592|GLEAN_04702|Tripeptidyl-peptidase 2-like protein
261	LOC660559	5.27114	2.62246e-05	TcasGA2_TC006664	pollen-specific leucine-rich repeat extensin-like protein 1	; pollen-specific leucine-rich repeat extensin-like protein 1|AUGUSTUS-3.0.2_06664|GLEAN_06664
262	LOC662899	5.25265	0.00033398	TcasGA2_TC007689	fatty acid synthase	; fatty acid synthase|AUGUSTUS-3.0.2_07689|Fatty acid synthase-like Protein|GLEAN_07689
263	LOC661547	5.24797	0.00103658	TcasGA2_TC013406	dedicator of cytokinesis protein 9	; LOW QUALITY PROTEIN: dedicator of cytokinesis protein 9|GLEAN_13406|GLEAN_13407
264	LOC663197	5.24474	0.00323302	TcasGA2_TC007685	NEDD8 ultimate buster 1	; NEDD8 ultimate buster 1|AUGUSTUS-3.0.2_07685|GLEAN_07685|NEDD8 ultimate buster 1-like Protein
265	LOC100750223	5.23783	0.0033714	TcasGA2_TC008650, GLEAN_08650, RYa	RYamide preprohormone	; RYamide preprohormone|AUGUSTUS-3.0.2_08650|RYamide neuropeptides
266	LOC662310	5.22611	0.00744087	TcasGA2_TC008999	SAYSvFN domain-containing protein 1	; SAYSvFN domain-containing protein 1|AUGUSTUS-3.0.2_33712|GLEAN_08999|SAYSvFN domain-containing protein 1-like Protein
267	LOC103312441	5.22248	0.0118974	TcasGA2_TC034611	small integral membrane protein 4	; small integral membrane protein 4|AUGUSTUS-3.0.2_34611|Small integral membrane protein 4-like protein
268	LOC660184	5.21849	0.0104171	TcasGA2_TC009615	abscission/NoCut checkpoint regulator	; abscission/NoCut checkpoint regulator|AUGUSTUS-3.0.2_09615|GLEAN_09615|Zinc finger FYVE domain-containing protein 19-like Protein|zinc finger FYVE domain-containing protein 19
269	LOC658197	5.21612	0.0421496	TcasGA2_TC007481	serine/threonine-protein kinase SIK2	; serine/threonine-protein kinase SIK2|AUGUSTUS-3.0.2_07481|GLEAN_07481|Serine/threonine-protein kinase SIK2-like Protein
270	LOC103313770	5.20603	1.97148e-08	TcasGA2_TC006093	hypothetical protein	; uncharacterized protein LOC103313770|AUGUSTUS-3.0.2_06093|GLEAN_06093
271	LOC100142149	5.1952	0.000478046	TcasGA2_TC012579	caspase Dronc	; caspase Dronc|AUGUSTUS-3.0.2_12579|Caspase Nc-like Protein|GLEAN_12579
272	LOC663757	5.19361	0.0178656	TcasGA2_TC009944	uncharacterized LOC663757	; uncharacterized protein LOC663757|GLEAN_09944
273	LOC103312135	5.17311	0.0133483	TcasGA2_TC000719	larval cuticle protein A2B	; larval cuticle protein A2B|AUGUSTUS-3.0.2_00719|GLEAN_00719|Larval cuticle protein A1A-like Protein
274	LOC656122	5.16692	7.07403e-08	TcasGA2_TC031245	RING finger protein nhl-1	; RING finger protein nhl-1|AUGUSTUS-3.0.2_31245|RING finger protein nhl-1-like Protein
275	LOC662034	5.16433	0.00110138	TcasGA2_TC011222	peroxidase	; peroxidase|AUGUSTUS-3.0.2_31335|Chorion peroxidase-like Protein|GLEAN_11222
276	LOC660174	5.15813	0.0218327	TcasGA2_TC013601	probable DNA mismatch repair protein Msh6	; probable DNA mismatch repair protein Msh6|AUGUSTUS-3.0.2_13601|GLEAN_13601|putative DNA mismatch repair protein Msh6-like Protein
277	LOC658913	5.15672	0.0184793	TcasGA2_TC013001	transcription initiation factor TFIID subunit 10	; transcription initiation factor TFIID subunit 10|GLEAN_13001
278	LOC103314036	5.13121	3.84591e-07	TcasGA2_TC006608	G-protein coupled receptor 161	; G-protein coupled receptor 161|AUGUSTUS-3.0.2_06608|GLEAN_06608
279	LOC100141540	5.11668	2.97141e-06	TcasGA2_TC032378	uncharacterized LOC100141540	; uncharacterized protein LOC100141540|AUGUSTUS-3.0.2_32378
280	LOC100141576	5.10236	0.0144682	TcasGA2_TC008700	uncharacterized LOC100141576	; uncharacterized protein LOC100141576|AUGUSTUS-3.0.2_08700|GLEAN_08700
281	LOC103314384	5.10178	8.80185e-13	TcasGA2_TC011237	hypothetical protein	; uncharacterized protein LOC103314384|AUGUSTUS-3.0.2_11237|GLEAN_11237
282	LOC103313834	5.08815	9.82327e-09	TcasGA2_TC008695	uncharacterized LOC103313834	; uncharacterized protein LOC103313834|AUGUSTUS-3.0.2_08695|GLEAN_08695
283	LOC103312584	5.07904	0.00905776	TcasGA2_TC002852	transcription initiation protein SPT3 homolog	; transcription initiation protein SPT3 homolog|AUGUSTUS-3.0.2_02852|GLEAN_02852|Transcription initiation protein SPT3 homolog-like Protein
284	LOC100142122	5.07037	0.0106539		histone H1B	; histone H1B|GLEAN_16003
285	LOC659528	5.05521	1.07625e-11	TcasGA2_TC015843	uncharacterized LOC659528	; uncharacterized protein LOC659528|AUGUSTUS-3.0.2_15843|AUGUSTUS-3.0.2_15844|Circadian clock-controlled protein-like Protein|GLEAN_15843|GLEAN_15844|Protein takeout-like Protein
286	LOC658312	5.05428	0.0048863	TcasGA2_TC000064	tRNA (guanine-N(7)-)-methyltransferase non-catalytic subunit wuho	; tRNA (guanine-N(7)-)-methyltransferase non-catalytic subunit wuho|GLEAN_00064
287	LOC103312136	5.04035	0.010289	TcasGA2_TC007157	hypothetical protein	; uncharacterized protein LOC103312136|AUGUSTUS-3.0.2_07157|GLEAN_07157
288	LOC107398884	5.03981	0.0413069		uncharacterized LOC107398884
289	LOC657358	5.02896	0.00114369	TcasGA2_TC005418	uncharacterized LOC657358	; uncharacterized protein LOC657358|AUGUSTUS-3.0.2_34173|GLEAN_05418|GLEAN_05419
290	LOC655872	5.02569	4.16547e-08	TcasGA2_TC006187	uncharacterized LOC655872	; uncharacterized protein LOC655872|AUGUSTUS-3.0.2_06187|GLEAN_06187
291	LOC655901	5.01348	0.000286618	TcasGA2_TC001569	putative lysozyme-like protein	; keratin, type I cytoskeletal 10|putative lysozyme-like protein|AUGUSTUS-3.0.2_01569|GLEAN_01569|sericin-1
292	LOC100142242	5.00665	9.72427e-05	TcasGA2_TC009582, enc, encore	cAMP-regulated phosphoprotein 21	; cAMP-regulated phosphoprotein 21|AUGUSTUS-3.0.2_09582|GLEAN_09582
293	LOC656925	4.99199	0.0138473	TcasGA2_TC003831	pupal cuticle protein 20	; pupal cuticle protein 20|AUGUSTUS-3.0.2_03831|GLEAN_03831
294	LOC659153	4.98967	0.00486939	TcasGA2_TC001236	methyltransferase-like protein 25	; methyltransferase-like protein 25|GLEAN_01236
295	LOC656884	4.98805	0.00488254	TcasGA2_TC001916, CYP306A1	cytochrome P450 306A1	; cytochrome P450 306a1|AUGUSTUS-3.0.2_01916|GLEAN_01916
296	LOC655867	4.98609	0.00687833	TcasGA2_TC008734	zonadhesin	; zonadhesin|AUGUSTUS-3.0.2_08734|GLEAN_08734
297	LOC663212	4.9849	0.000346906	TcasGA2_TC008986	zinc finger protein 595	; zinc finger protein 595|GLEAN_08986
298	LOC100141950	4.97508	0.00163967	TcasGA2_TC033955	alpha-ketoglutarate-dependent dioxygenase alkB homolog 7, mitochondrial	; alpha-ketoglutarate-dependent dioxygenase alkB homolog 7, mitochondrial|AUGUSTUS-3.0.2_33955|Alpha-ketoglutarate-dependent dioxygenase alkB homolog 7, mitochondrial-like Protein
299	LOC659913	4.96698	0.000114203	TcasGA2_TC002648	uncharacterized LOC659913	; uncharacterized protein LOC659913|AUGUSTUS-3.0.2_02648|GLEAN_02648
300	Y-2	4.96611	0.000173163	TcasGA2_TC003539	yellow-2	; yellow-2|AUGUSTUS-3.0.2_03539|GLEAN_03539|Protein yellow-like Protein
301	LOC659990	4.95031	0.016047	TcasGA2_TC014873	facilitated trehalose transporter Tret1	; facilitated trehalose transporter Tret1|AUGUSTUS-3.0.2_33468|GLEAN_14873
302	LOC107397415	4.94279	0.00155216		leukocyte surface antigen CD53-like	; leukocyte surface antigen CD53-like
303	lgl	4.94155	1.17687e-07	TcasGA2_TC015986	lethal(2) giant larvae protein homolog 1	; lethal(2) giant larvae protein homolog 1|AUGUSTUS-3.0.2_15986|GLEAN_15986|Lethal(2) giant larvae protein-like Protein|lethal giant larvae
304	LOC657246	4.93536	1.86027e-05	TcasGA2_TC001302	protein SERAC1	; protein SERAC1|AUGUSTUS-3.0.2_01302|GLEAN_01302|Protein SERAC1-like Protein
305	LOC103313751	4.93094	0.00288492	TcasGA2_TC010075	uncharacterized LOC103313751	; uncharacterized protein LOC103313751|AUGUSTUS-3.0.2_33830|AUGUSTUS-3.0.2_34795|GLEAN_10075|Serine protease easter-like Protein
306	LOC664195	4.92507	0.00565222	TcasGA2_TC009972	DNA excision repair protein ERCC-6	; DNA excision repair protein ERCC-6|AUGUSTUS-3.0.2_09972|GLEAN_09972|Transcription termination factor 2-like Protein
307	LOC663012	4.91622	0.0086718	TcasGA2_TC003481	negative elongation factor B	; negative elongation factor B|AUGUSTUS-3.0.2_03481|GLEAN_03481|Negative elongation factor B-like Protein
308	LOC661366	4.91145	2.00773e-05	TcasGA2_TC003999	uncharacterized LOC661366	; uncharacterized protein LOC661366|AUGUSTUS-3.0.2_03999|GLEAN_03999
309	LOC658502	4.90945	0.00953	TcasGA2_TC013701	protein AF-10	; protein AF-10|AUGUSTUS-3.0.2_13701|GLEAN_13701
310	LOC657918	4.90936	0.00458803	TcasGA2_TC000110	transcription termination factor 2	; transcription termination factor 2|AUGUSTUS-3.0.2_00110|GLEAN_00110|Transcription termination factor 2-like Protein
311	LOC658244	4.90014	1.45928e-05	TcasGA2_TC032997	uncharacterized LOC658244	; uncharacterized protein LOC658244|AUGUSTUS-3.0.2_32997
312	LOC659513	4.89323	0.000549789	TcasGA2_TC007874	bestrophin-4	; bestrophin-2|bestrophin-4|AUGUSTUS-3.0.2_07874|Bestrophin-2-like Protein|GLEAN_07874
313	LOC100141611	4.88378	5.21043e-11	TcasGA2_TC003028	uncharacterized LOC100141611	; uncharacterized protein LOC100141611|AUGUSTUS-3.0.2_03028|BTB/POZ domain-containing protein 1-like Protein|BTB/POZ domain-containing protein 2|GLEAN_03028
314	LOC657215	4.88332	0.0449539	TcasGA2_TC030891	GPI ethanolamine phosphate transferase 1	; GPI ethanolamine phosphate transferase 1|AUGUSTUS-3.0.2_30891|GPI ethanolamine phosphate transferase 1-like Protein
315	LOC103314258	4.8809	0.0349079	TcasGA2_TC012542	ubiquitin-like-conjugating enzyme ATG10	; ubiquitin-like-conjugating enzyme ATG10|AUGUSTUS-3.0.2_12542|GLEAN_12542
316	LOC659765	4.8791	1.89384e-07	TcasGA2_TC000782	diacylglycerol kinase theta	; diacylglycerol kinase theta|AUGUSTUS-3.0.2_00782|Diacylglycerol kinase theta-like Protein|GLEAN_00782|GLEAN_00783
317	LOC662158	4.85372	1.84586e-05	TcasGA2_TC015054	regulator of microtubule dynamics protein 2	; regulator of microtubule dynamics protein 2|AUGUSTUS-3.0.2_15054|GLEAN_15054
318	LOC657689	4.85312	8.79914e-05	TcasGA2_TC015941	homer protein homolog 2	; homer protein homolog 2|AUGUSTUS-3.0.2_15941|GLEAN_15941|Homer protein homolog 2-like Protein
319	LOC655945	4.84551	0.000309953	TcasGA2_TC014953	PP2C-like domain-containing protein CG9801	; PP2C-like domain-containing protein CG9801|AUGUSTUS-3.0.2_14953|GLEAN_14953
320	LOC662709	4.84503	0.000100982	TcasGA2_TC008919, kinesin-3D	kinesin 3D	; kinesin-like protein KIF16B|AUGUSTUS-3.0.2_08919|GLEAN_08919|Kinesin-like protein unc-104
321	LOC103314818	4.84311	4.49921e-05	TcasGA2_TC004133	hypothetical protein	; uncharacterized protein LOC103314818|AUGUSTUS-3.0.2_04133|GLEAN_04133
322	LOC655974	4.83235	6.58379e-07	TcasGA2_TC034520	uncharacterized LOC655974	; uncharacterized protein LOC655974|AUGUSTUS-3.0.2_34520|GLEAN_01444
323	LOC657738	4.83174	0.000826317	TcasGA2_TC009794	transcriptional regulator ATRX homolog	; transcriptional regulator ATRX homolog|AUGUSTUS-3.0.2_09794|GLEAN_09794|Transcriptional regulator ATRX homolog-like Protein
324	LOC100142359	4.82075	0.0295139	TcasGA2_TC014217	transcription initiation factor TFIID subunit 3	; transcription initiation factor TFIID subunit 3|AUGUSTUS-3.0.2_14217|GLEAN_14217
325	LOC663090	4.81424	6.35623e-11	TcasGA2_TC002954	cathepsin B precursor	; cathepsin B|AUGUSTUS-3.0.2_02954|GLEAN_02954
326	LOC664539	4.80911	0.0013135	TcasGA2_TC007276	zinc finger CCCH domain-containing protein 14	; zinc finger CCCH domain-containing protein 14|AUGUSTUS-3.0.2_07276|GLEAN_07276
327	LOC661965	4.8084	0.00503597	TcasGA2_TC007594	helix-loop-helix protein delilah	; helix-loop-helix protein delilah|AUGUSTUS-3.0.2_07594|GLEAN_07594|Helix-loop-helix protein delilah-like Protein
328	LOC100141818	4.80818	0.00591641	TcasGA2_TC034030	sulfhydryl oxidase 2-like	; sulfhydryl oxidase 2-like|AUGUSTUS-3.0.2_34030|Sulfhydryl oxidase 1-like Protein
329	LOC660108	4.79791	1.08865e-06	TcasGA2_TC013686	coiled-coil and C2 domain-containing protein 1-like	; coiled-coil and C2 domain-containing protein 1-like|AUGUSTUS-3.0.2_13686|GLEAN_13686
330	LOC664343	4.77834	0.0120992	TcasGA2_TC003549	pyrroline-5-carboxylate reductase	; pyrroline-5-carboxylate reductase|AUGUSTUS-3.0.2_03549|GLEAN_03549|Pyrroline-5-carboxylate reductase-like Protein
331	LOC661273	4.76821	0.0120431	TcasGA2_TC009182	squamous cell carcinoma antigen recognized by T-cells 3	; squamous cell carcinoma antigen recognized by T-cells 3|AUGUSTUS-3.0.2_09182|GLEAN_09182|Squamous cell carcinoma antigen recognized by T-cells 3-like Protein
332	LOC662741	4.75588	0.000108628	TcasGA2_TC009753	sodium-dependent neutral amino acid transporter B(0)AT3	; sodium-dependent neutral amino acid transporter B(0)AT3|AUGUSTUS-3.0.2_09753|GLEAN_09753|Sodium- and chloride-dependent GABA transporter ine-like Protein
333	LOC658133	4.75058	0.000260501	TcasGA2_TC014890	sperm-associated antigen 6	; sperm-associated antigen 6|AUGUSTUS-3.0.2_14892|AUGUSTUS-3.0.2_33460|GLEAN_14890|GLEAN_14892|Sperm-associated antigen 6-like Protein
334	LOC662064	4.74669	0.00921141	TcasGA2_TC012302	uncharacterized LOC662064	; uncharacterized protein LOC662064|AUGUSTUS-3.0.2_12302|GLEAN_12302
335	LOC103312371	4.74621	0.00149964	TcasGA2_TC003555	myosin-10	; myosin-10|AUGUSTUS-3.0.2_03555|GLEAN_03555
336	LOC103313502	4.73851	0.00158306	TcasGA2_TC009461	homeobox protein Hox-D4a	; homeobox protein Hox-D4a|AUGUSTUS-3.0.2_09461|GLEAN_09461|Motor neuron and pancreas homeobox protein 1-like Protein
337	LOC658622	4.71991	0.0145844	TcasGA2_TC011542	ATM interactor	; ATM interactor|AUGUSTUS-3.0.2_11542|GLEAN_11542
338	LOC663852	4.71438	3.5058e-11	TcasGA2_TC013096	mitochondrial sodium/hydrogen exchanger 9B2	; mitochondrial sodium/hydrogen exchanger 9B2|GLEAN_13096
339	LOC658515	4.70572	0.000615961		receptor-type tyrosine-protein phosphatase T	; receptor-type tyrosine-protein phosphatase F|receptor-type tyrosine-protein phosphatase T|AUGUSTUS-3.0.2_34769|GLEAN_09604|Receptor-type tyrosine-protein phosphatase S-like protein
340	LOC661741	4.69371	0.00441474	TcasGA2_TC012074, numb	protein numb	; protein numb|AUGUSTUS-3.0.2_12074|GLEAN_12074|numb homolog
341	LOC103312110	4.68968	0.015177		beta-glucuronidase-like	; beta-glucuronidase-like
342	Kr-h1	4.68214	0.000160743	TcasGA2_TC012990	Kruppel homolog 1	; Kruppel-homolog 1|AUGUSTUS-3.0.2_12990|GLEAN_12990|Krueppel homolog 1-like Protein
343	LOC103313331	4.67249	0.0416269		myoD family inhibitor domain-containing protein-like	; myoD family inhibitor domain-containing protein-like
344	LOC658656	4.67191	0.00011848	TcasGA2_TC003972, ap, apterous	apterous a	; apterous a|AUGUSTUS-3.0.2_32662|AUGUSTUS-3.0.2_32663|CTP synthase-like Protein|GLEAN_03972|GLEAN_03973|ap A
345	LOC656236	4.66876	1.16416e-08	TcasGA2_TC011953	macrophage erythroblast attacher	; macrophage erythroblast attacher|AUGUSTUS-3.0.2_11953|GLEAN_11953|Macrophage erythroblast attacher-like Protein
346	LOC655419	4.65762	1.22529e-09	TcasGA2_TC000953	F-box only protein 28	; F-box only protein 28|AUGUSTUS-3.0.2_00953|F-box only protein 28-like Protein|GLEAN_00953
347	LOC655897	4.63605	2.95558e-06		carboxypeptidase A	; cytosolic carboxypeptidase-like protein 5|AUGUSTUS-3.0.2_16122|GLEAN_16122
348	LOC103315131	4.634	0.000287896	TcasGA2_TC030619	neurogenic protein mastermind	; neurogenic protein mastermind|AUGUSTUS-3.0.2_30619|GLEAN_00809-OG15767
349	LOC660888	4.63326	0.03063	TcasGA2_TC009548	prolow-density lipoprotein receptor-related protein 1	; LOW QUALITY PROTEIN: prolow-density lipoprotein receptor-related protein 1|AUGUSTUS-3.0.2_09548|GLEAN_09548|Prolow-density lipoprotein receptor-related protein 1-like Protein
350	LOC662660	4.6299	0	TcasGA2_TC010884	BCL2/adenovirus E1B 19 kDa protein-interacting protein 3	; BCL2/adenovirus E1B 19 kDa protein-interacting protein 3|AUGUSTUS-3.0.2_10884|GLEAN_10884
351	LOC663601	4.62709	1.42824e-05	TcasGA2_TC014708, rel	uncharacterized LOC663601	; uncharacterized protein LOC663601|GLEAN_14708|v-rel avian reticuloendotheliosis viral oncogene homolog
352	LOC663861	4.6267	1.14754e-05	TcasGA2_TC000366	uncharacterized LOC663861	; uncharacterized protein LOC663861|AUGUSTUS-3.0.2_00366|GLEAN_00366
353	LOC658114	4.61742	0.0372091	TcasGA2_TC002458	zinc finger CCCH domain-containing protein 3	; zinc finger CCCH domain-containing protein 3|AUGUSTUS-3.0.2_02458|GLEAN_02458
354	LOC103313972	4.61573	0.00130141	TcasGA2_TC006403	tudor domain-containing protein 1	; tudor domain-containing protein 1|AUGUSTUS-3.0.2_06403|GLEAN_06403
355	LOC655137	4.6145	0.0217637	TcasGA2_TC008612	uncharacterized LOC655137	; uncharacterized protein LOC655137|AUGUSTUS-3.0.2_33884|GLEAN_08612
356	LOC658928	4.61099	0.00661138	TcasGA2_TC003699	vacuolar protein sorting-associated protein 8 homolog	; vacuolar protein sorting-associated protein 8 homolog|AUGUSTUS-3.0.2_03699|GLEAN_03699|Vacuolar protein sorting-associated protein 8 homolog-like Protein
357	LOC100141715	4.6066	1.35767e-08	TcasGA2_TC030696	importin-4	; importin-4|AUGUSTUS-3.0.2_30696|GLEAN_02815-OG2538|Importin-4-like Protein
358	LOC657712	4.58724	2.21166e-07	TcasGA2_TC002853	heterogeneous nuclear ribonucleoprotein L	; heterogeneous nuclear ribonucleoprotein L|AUGUSTUS-3.0.2_02855|AUGUSTUS-3.0.2_32420|GLEAN_02853|GLEAN_02855|Heterogeneous nuclear ribonucleoprotein L-like Protein
359	LOC663281	4.58588	0.00151405	TcasGA2_TC012710	uncharacterized LOC663281	; uncharacterized protein LOC663281|AUGUSTUS-3.0.2_12712|AUGUSTUS-3.0.2_34442|GLEAN_12710|GLEAN_12711|GLEAN_12712|Protein phosphatase Slingshot-like Protein|Telomerase-binding protein EST1A-like Protein|protein phosphatase Slingshot|telomerase-binding protein EST1A
360	LOC660596	4.5843	0.0230667	TcasGA2_TC013681	cytochrome P450 4c3	; cytochrome P450 4c3|AUGUSTUS-3.0.2_13681|GLEAN_13681|cytochrome P450-like protein
361	LOC662550	4.58044	0.00529589	TcasGA2_TC009916	nuclear export mediator factor NEMF homolog	; nuclear export mediator factor NEMF homolog|AUGUSTUS-3.0.2_09916|GLEAN_09916|Nuclear export mediator factor NEMF homolog-like Protein
362	LOC107398078	4.55849	0.00637362		uncharacterized LOC107398078
363	LOC658857	4.53579	4.66232e-05	TcasGA2_TC002734	islet cell autoantigen 1	; islet cell autoantigen 1|AUGUSTUS-3.0.2_02734|GLEAN_02734|Islet cell autoantigen 1-like Protein
364	LOC661343	4.53343	6.34506e-10	TcasGA2_TC005383	ankyrin repeat and fibronectin type-III domain-containing protein 1	; ankyrin repeat and fibronectin type-III domain-containing protein 1|uncharacterized protein LOC661343|AUGUSTUS-3.0.2_34180|AUGUSTUS-3.0.2_34181|AUGUSTUS-3.0.2_34182|AUGUSTUS-3.0.2_34183|GLEAN_05383
365	LOC103315212	4.53133	4.64682e-10	TcasGA2_TC000440	uncharacterized LOC103315212	; uncharacterized protein LOC103315212|AUGUSTUS-3.0.2_00440|GLEAN_00440
366	LOC660112	4.52317	6.97709e-12	TcasGA2_TC014637	fibril-forming collagen alpha chain	; fibril-forming collagen alpha chain|GLEAN_14637
367	LOC655147	4.51217	0.000527331	TcasGA2_TC005588	macoilin	; macoilin|AUGUSTUS-3.0.2_05588|GLEAN_05588|Macoilin-2-like Protein
368	LOC657143	4.49869	8.88178e-16	TcasGA2_TC010675	knickkopf 3	; protein Skeletor, isoforms B/C|GLEAN_10675|truncated knickkopf 3
369	LOC663246	4.49145	2.22045e-16	TcasGA2_TC003485	uncharacterized LOC663246	; uncharacterized protein LOC663246|AUGUSTUS-3.0.2_03485|GLEAN_03485
370	LOC660712	4.47794	3.78377e-05	TcasGA2_TC013779, Vkr	venus kinase receptor	; uncharacterized protein LOC660712|AUGUSTUS-3.0.2_13779|GLEAN_13779
371	LOC663228	4.47325	0	TcasGA2_TC014322	repressor of RNA polymerase III transcription MAF1 homolog	; repressor of RNA polymerase III transcription MAF1 homolog|GLEAN_14322
372	LOC103312736	4.46641	0.0360833	TcasGA2_TC008120	uncharacterized LOC103312736	; uncharacterized protein LOC103312736|AUGUSTUS-3.0.2_08120|GLEAN_08120
373	Ddc	4.45703	1.20792e-13	TcasGA2_TC013480	dopa decarboxylase	; aromatic-L-amino-acid decarboxylase|GLEAN_13480
374	LOC662969	4.45512	0.02369	TcasGA2_TC009330	sodium/calcium exchanger 3	; sodium/calcium exchanger 3|AUGUSTUS-3.0.2_09330|GLEAN_09330|Sodium/calcium exchanger 3-like Protein
375	LOC663665	4.43543	0.0389563	TcasGA2_TC009939	RAB6A-GEF complex partner protein 2	; RAB6A-GEF complex partner protein 2|AUGUSTUS-3.0.2_09939|GLEAN_09939|Retrograde Golgi transport protein RGP1 homolog-like Protein|retrograde Golgi transport protein RGP1 homolog
376	LOC662434	4.43272	0.0159715	TcasGA2_TC003181	uncharacterized LOC662434	; uncharacterized protein LOC662434|AUGUSTUS-3.0.2_03181|GLEAN_03181
377	LOC662163	4.43044	0.000464139	TcasGA2_TC009635	alpha-N-acetylgalactosaminidase	; alpha-N-acetylgalactosaminidase|GLEAN_09635
378	Sira	4.42051	2.92524e-11	TcasGA2_TC011760, sid-1	Sid-1-related A	; Sid-1-related A|AUGUSTUS-3.0.2_11760|GLEAN_11760|systemic RNA interference defective protein 1
379	LOC663248	4.41233	0.0475266	TcasGA2_TC007936	bifunctional lysine-specific demethylase and histidyl-hydroxylase NO66	; bifunctional lysine-specific demethylase and histidyl-hydroxylase NO66|AUGUSTUS-3.0.2_07936|Bifunctional lysine-specific demethylase and histidyl-hydroxylase NO66-like Protein|GLEAN_07936
380	LOC662626	4.40565	0.0125684	TcasGA2_TC010883	protein ABHD18	; protein ABHD18|AUGUSTUS-3.0.2_10883|GLEAN_10883|uncharacterized protein C4orf29
381	LOC663334	4.3949	2.12032e-08	TcasGA2_TC015519	chloride channel protein 2	; chloride channel protein 2|AUGUSTUS-3.0.2_33354|Chloride channel protein 2-like Protein|GLEAN_15519
382	LOC656162	4.39419	6.68838e-05	TcasGA2_TC011456	39S ribosomal protein L30, mitochondrial	; 39S ribosomal protein L30, mitochondrial|39S ribosomal protein L30, mitochondrial-like Protein|GLEAN_11456
383	LOC103312995	4.39141	0.0213528	TcasGA2_TC013670	cubilin	; cubilin|AUGUSTUS-3.0.2_13670|Cubilin-like Protein|GLEAN_13670
384	LOC103312914	4.387	0.00344886	TcasGA2_TC013771, Or334	uncharacterized LOC103312914	; uncharacterized protein LOC103312914|GLEAN_13771|odorant receptor 334
385	LOC103314430	4.38577	4.35152e-09	TcasGA2_TC031385	transmembrane and ubiquitin-like domain-containing protein 2	; transmembrane and ubiquitin-like domain-containing protein 2|AUGUSTUS-3.0.2_31385|Transmembrane and ubiquitin-like domain-containing protein 1
386	LOC103313507	4.38435	0.0253464	TcasGA2_TC030679	dihydrofolate reductase	; dihydrofolate reductase|AUGUSTUS-3.0.2_30679|Dihydrofolate reductase-like Protein|GLEAN_09346-OG23124
387	LOC655652	4.36805	0.0453752	TcasGA2_TC009873	cuticle protein 7	; cuticle protein 7|AUGUSTUS-3.0.2_09873|GLEAN_09873
388	LOC657589	4.36582	7.31121e-05	TcasGA2_TC034144	sodium-independent sulfate anion transporter-like	; sodium-independent sulfate anion transporter-like|AUGUSTUS-3.0.2_34144|Sodium-independent sulfate anion transporter-like Protein
389	LOC657898	4.36576	0.00594441	TcasGA2_TC033639	KAT8 regulatory NSL complex subunit 2	; KAT8 regulatory NSL complex subunit 2|AUGUSTUS-3.0.2_33639|KAT8 regulatory NSL complex subunit 2-like Protein
390	LOC655158	4.36231	0.000508762		exodeoxyribonuclease-like	; exodeoxyribonuclease-like
391	LOC103312580	4.3531	0.0041279	TcasGA2_TC007655	hypothetical protein	; uncharacterized protein LOC103312580|AUGUSTUS-3.0.2_07655|GLEAN_07655
392	LOC661353	4.34257	8.51868e-06	TcasGA2_TC005167	IQ motif and SEC7 domain-containing protein 1	; IQ motif and SEC7 domain-containing protein 1|AUGUSTUS-3.0.2_05167|GLEAN_05167|IQ motif and SEC7 domain-containing protein 1-like Protein
393	LOC663905	4.33344	0.0389495	TcasGA2_TC001189, Tiap2	inhibitor of apoptosis 2	; inhibitor of apoptosis 2|AUGUSTUS-3.0.2_01189|Apoptosis 2 inhibitor-like Protein|GLEAN_01189
394	LOC656937	4.33326	0.0019546	TcasGA2_TC014089	probable multidrug resistance-associated protein lethal(2)03659	; probable multidrug resistance-associated protein lethal(2)03659|AUGUSTUS-3.0.2_14089|GLEAN_14089|putative multidrug resistance-associated protein lethal(2)03659-like Protein
395	LOC659846	4.32852	0.0025043	TcasGA2_TC002727	DTW domain-containing protein 1	; LOW QUALITY PROTEIN: DTW domain-containing protein 1|AUGUSTUS-3.0.2_32492|DTW domain-containing protein 1-like Protein|GLEAN_02727
396	LOC659961	4.32042	6.64846e-06	TcasGA2_TC004976, Cad96Ca	tyrosine kinase receptor Cad96Ca	; tyrosine kinase receptor Cad96Ca|AUGUSTUS-3.0.2_04976|GLEAN_04976|cadherin 96Ca
397	LOC103314772	4.31843	0.0233315		uncharacterized LOC103314772	; uncharacterized protein LOC103314772|AUGUSTUS-3.0.2_01440|GLEAN_01440
398	LOC657653	4.31341	0.000402264	TcasGA2_TC013195	uncharacterized LOC657653	; uncharacterized protein LOC657653|GLEAN_13195
399	Sog	4.31027	5.56176e-09	TcasGA2_TC012650, TcSog	short gastrulation	; short gastrulation|AUGUSTUS-3.0.2_12650|GLEAN_12650
400	LOC661706	4.29671	0.0187422	TcasGA2_TC004798	protein SZT2	; protein SZT2|AUGUSTUS-3.0.2_04798|GLEAN_04798
401	LOC659137	4.28967	0.00936815		solute carrier family 22 member 1	; solute carrier family 22 member 1|GLEAN_10997
402	LOC657982	4.28265	1.24418e-05	TcasGA2_TC006735, Mmp-2, Mmp2	matrix metalloproteinase 2	; matrix metalloproteinase-2|AUGUSTUS-3.0.2_06735|GLEAN_06735
403	LOC663166	4.27726	0.000671937	TcasGA2_TC012709, Si:dkey-189p24.5 protein-like	cob(I)yrinic acid a,c-diamide adenosyltransferase, mitochondrial	; cob(I)yrinic acid a,c-diamide adenosyltransferase, mitochondrial|AUGUSTUS-3.0.2_12709|Cob(I)yrinic acid a,c-diamide adenosyltransferase, mitochondrial-like Protein|GLEAN_12709
404	LOC100142219	4.2768	0.000194754		uncharacterized LOC100142219	; uncharacterized protein LOC100142219|AUGUSTUS-3.0.2_34475
405	LOC654983	4.27615	0	TcasGA2_TC008227	cuticle protein 63	; cuticle protein 63|GLEAN_08227
406	LOC664226	4.27595	1.02456e-07	TcasGA2_TC014751	protein FAM122A	; protein FAM122A|GLEAN_14751
407	LOC664489	4.27449	0.00131893	TcasGA2_TC008801	dynein heavy chain	; dynein heavy chain, cytoplasmic|AUGUSTUS-3.0.2_08801|GLEAN_08801
408	Cad	4.274	0.000197232	TcasGA2_TC007576, Tc-cad, caudal-1, caudal-2	caudal	; caudal|AUGUSTUS-3.0.2_32769|GLEAN_07576|GLEAN_07577|Homeotic protein caudal-like Protein
409	LOC660910	4.27063	0.00029148	TcasGA2_TC004391	PHD finger protein 19	; PHD finger protein 19|AUGUSTUS-3.0.2_04391|GLEAN_04391
410	LOC662799	4.26214	0	TcasGA2_TC014686	cuticular protein	; cuticular protein|GLEAN_14686
411	LOC103314871	4.24636	0.00435854	TcasGA2_TC001617	uncharacterized LOC103314871	; uncharacterized protein LOC103314871|AUGUSTUS-3.0.2_01617|GLEAN_01617
412	LOC655036	4.24384	0.0148689	TcasGA2_TC001362	aminopeptidase N	; aminopeptidase N|AUGUSTUS-3.0.2_01362|GLEAN_01362|aminopeptidase-like protein
413	LOC100141799	4.24057	0.00231256	TcasGA2_TC012354	prolyl 3-hydroxylase OGFOD1	; prolyl 3-hydroxylase OGFOD1|AUGUSTUS-3.0.2_12354|GLEAN_12354|Prolyl 3-hydroxylase sudestada1-like Protein|prolyl 3-hydroxylase sudestada1
414	LOC658306	4.2319	7.90217e-06	TcasGA2_TC012828	cuticle protein 18.7	; cuticle protein 18.7|AUGUSTUS-3.0.2_12828|GLEAN_12828
415	LOC655983	4.21765	0.0128525	TcasGA2_TC016031	DDB1- and CUL4-associated factor 6	; LOW QUALITY PROTEIN: DDB1- and CUL4-associated factor 6|AUGUSTUS-3.0.2_35035|DDB1- and CUL4-associated factor 6-like protein|GLEAN_16031
416	LOC661995	4.20691	7.17638e-05	TcasGA2_TC004803	dual specificity mitogen-activated protein kinase kinase dSOR1	; dual specificity mitogen-activated protein kinase kinase dSOR1|AUGUSTUS-3.0.2_04803|Dual specificity mitogen-activated protein kinase kinase dSOR1-like Protein|GLEAN_04803
417	LOC661233	4.20564	1.04607e-08	TcasGA2_TC010324	ATP-dependent RNA helicase dbp2	; ATP-dependent RNA helicase dbp2|ATP-dependent RNA helicase p62-like Protein|AUGUSTUS-3.0.2_10324|GLEAN_10324
418	LOC660733	4.19876	0.000115632	TcasGA2_TC005849	L-xylulose reductase	; L-xylulose reductase|AUGUSTUS-3.0.2_05849|GLEAN_05849|L-xylulose reductase-like Protein
419	LOC663936	4.19801	0.00401881	TcasGA2_TC005719	pre-mRNA-splicing regulator female-lethal(2)D	; pre-mRNA-splicing regulator female-lethal(2)D|AUGUSTUS-3.0.2_05719|GLEAN_05719|Pre-mRNA-splicing regulator female-lethal(2)D-like Protein
420	LOC657028	4.19513	0.00138847	TcasGA2_TC015544	uncharacterized protein CG3556	; uncharacterized protein CG3556|AUGUSTUS-3.0.2_15544|GLEAN_15544
421	LOC664436	4.19188	9.76144e-05	TcasGA2_TC010007	centromere-associated protein E	; centromere-associated protein E|AUGUSTUS-3.0.2_10007|AUGUSTUS-3.0.2_33795|GLEAN_10007
422	LOC103313096	4.19055	0.000863876	TcasGA2_TC033119	hypothetical protein	; uncharacterized protein LOC103313096|AUGUSTUS-3.0.2_33119
423	LOC658621	4.18129	0.0036622	TcasGA2_TC015949	neuralized-like protein 2	; neuralized-like protein 2|AUGUSTUS-3.0.2_15949|GLEAN_15949
424	LOC103313007	4.17963	0.045205	TcasGA2_TC013650	prostaglandin E2 receptor EP2 subtype	; prostaglandin E2 receptor EP2 subtype|AUGUSTUS-3.0.2_13650|GLEAN_13650|Prostaglandin E2 receptor EP4 subtype-like Protein|rhodopsin, GQ-coupled
425	LOC661131	4.17529	0.000409297	TcasGA2_TC010450	GRIP and coiled-coil domain-containing protein 2	; GRIP and coiled-coil domain-containing protein 2|AUGUSTUS-3.0.2_10450|AUGUSTUS-3.0.2_10451|Coiled-coil domain-containing protein 39-like Protein|GLEAN_10450|GLEAN_10451
426	LOC655400	4.15916	0.042087	TcasGA2_TC010661	E3 ubiquitin-protein ligase rififylin	; E3 ubiquitin-protein ligase rififylin|AUGUSTUS-3.0.2_10661|E3 ubiquitin-protein ligase rififylin-like Protein|GLEAN_10661
427	LOC100141643	4.15267	5.13008e-05	TcasGA2_TC013027	uncharacterized LOC100141643	; uncharacterized protein LOC100141643|GLEAN_13027|GLEAN_13028
428	LOC664121	4.14153	0.0356342	TcasGA2_TC013076	origin recognition complex subunit 3	; origin recognition complex subunit 3|GLEAN_13076
429	LOC652934	4.11289	0.0208487	TcasGA2_TC007637, Dac	dachshund homolog 1	; dachshund homolog 1|AUGUSTUS-3.0.2_32755|GLEAN_07637|GLEAN_07638|GLEAN_07639
430	LOC662886	4.11232	0.0156095	TcasGA2_TC005982	sialin	; sialin|AUGUSTUS-3.0.2_05982|GLEAN_05982|Putative inorganic phosphate cotransporter-like Protein
431	LOC658096	4.1056	7.54952e-15	TcasGA2_TC004551, GLEAN_04551	peroxidase	; peroxidase|AUGUSTUS-3.0.2_04551|Peroxidase-like Protein
432	LOC664015	4.10409	0.0383082	TcasGA2_TC007127	nose resistant to fluoxetine protein 6	; nose resistant to fluoxetine protein 6|AUGUSTUS-3.0.2_07127|GLEAN_07127|Nose resistant to fluoxetine protein 6-like Protein
433	LOC658498	4.09334	2.28996e-05	TcasGA2_TC008410	uncharacterized LOC658498	; uncharacterized protein LOC658498|AUGUSTUS-3.0.2_08410|GLEAN_08410
434	LOC103314510	4.09269	0.023731		uncharacterized LOC103314510
435	Rdl	4.08141	0.0375476		GABA receptor	; GABA receptor|AUGUSTUS-3.0.2_10482|GLEAN_10482|dieldrin resistance|resistant to dieldrin
436	LOC664123	4.07834	0.00606358	TcasGA2_TC012756	protein croquemort	; protein croquemort|AUGUSTUS-3.0.2_12756|GLEAN_12756|Protein croquemort-like Protein
437	LOC658140	4.07608	0.00813912	TcasGA2_TC006107	uncharacterized LOC658140	; uncharacterized protein LOC658140|AUGUSTUS-3.0.2_06107|GLEAN_06107|high mobility group protein I
438	LOC662924	4.07431	1.2019e-06	TcasGA2_TC007945	mucin-5B	; mucin-5B|AUGUSTUS-3.0.2_07945|GLEAN_07945
439	LOC655596	4.07338	0.0169402	TcasGA2_TC002393	uncharacterized LOC655596	; uncharacterized protein LOC655596|AUGUSTUS-3.0.2_02393|GLEAN_02393
440	LOC654936	4.06514	0.0120133	TcasGA2_TC015023	coiled-coil domain-containing protein 136	; coiled-coil domain-containing protein 136|AUGUSTUS-3.0.2_15023|AUGUSTUS-3.0.2_15024|GLEAN_15023|GLEAN_15024|Spectrin beta chain-like Protein
441	LOC100142278	4.06373	1.89921e-05	TcasGA2_TC012356	SWI/SNF complex subunit SMARCC2	; SWI/SNF complex subunit SMARCC2|AUGUSTUS-3.0.2_12356|GLEAN_12356|SWI/SNF complex subunit SMARCC2-like Protein
442	LOC663318	4.05579	0.00108636	TcasGA2_TC005506	ralBP1-associated Eps domain-containing protein 1	; ralBP1-associated Eps domain-containing protein 1|AUGUSTUS-3.0.2_05506|GLEAN_05506
443	LOC662437	4.05208	0.0269371	TcasGA2_TC007921	condensin complex subunit 3	; condensin complex subunit 3|AUGUSTUS-3.0.2_07921|Condensin complex subunit 3-like Protein|GLEAN_07921
444	LOC659637	4.0495	1.64593e-10	TcasGA2_TC003607	serine/threonine-protein kinase N	; serine/threonine-protein kinase N|AUGUSTUS-3.0.2_32430|AUGUSTUS-3.0.2_32431|GLEAN_03607|GLEAN_03608|Serine/threonine-protein kinase N-like Protein
445	LOC660987	4.04375	0.000114395	TcasGA2_TC013589	SLIT-ROBO Rho GTPase-activating protein 1	; SLIT-ROBO Rho GTPase-activating protein 1|AUGUSTUS-3.0.2_13589|GLEAN_13589|SLIT-ROBO Rho GTPase-activating protein 1-like Protein
446	LOC657009	4.03989	0.00310361	TcasGA2_TC003766	ADP-ribosylation factor-like protein 6-interacting protein 4	; ADP-ribosylation factor-like protein 6-interacting protein 4|GLEAN_03766
447	LOC655405	4.03636	2.70721e-08	TcasGA2_TC001999	stress-induced-phosphoprotein 1	; stress-induced-phosphoprotein 1|AUGUSTUS-3.0.2_30942|GLEAN_01999|GLEAN_02163|Stress-induced-phosphoprotein 1-like Protein
448	LOC107398045	4.02658	0.0011132		uncharacterized LOC107398045
449	LOC660035	4.02653	0.00377262	TcasGA2_TC002723	filamin-A	; filamin-A|filamin-C|AUGUSTUS-3.0.2_31046|Filamin-A-like Protein|GLEAN_02723
450	LOC659840	4.02557	0.000102972	TcasGA2_TC001322	mitochondrial import inner membrane translocase subunit Tim17-B	; mitochondrial import inner membrane translocase subunit Tim17-B|AUGUSTUS-3.0.2_01322|GLEAN_01322|putative mitochondrial import inner membrane translocase subunit Tim17 1-like Protein
451	LOC661721	4.02549	0.0116473	TcasGA2_TC013404	hypothetical protein	; protein takeout|GLEAN_13404
452	LOC107398272	4.02344	0.0454982		neprilysin-21-like	; neprilysin-21-like
453	LOC663533	4.02131	5.53674e-08	TcasGA2_TC014705	rho-associated protein kinase 1	; rho-associated protein kinase 1|AUGUSTUS-3.0.2_14705|Rho-associated protein kinase 1-like Protein
454	Csp19	4.02098	0.0373093	TcasGA2_TC015950, TcCSP7A, TcasCSP19	chemosensory protein 19	; chemosensory protein 19|GLEAN_15950
455	LOC661701	4.0168	0.00760689		E3 ubiquitin-protein ligase TRIM37	; E3 ubiquitin-protein ligase TRIM37|uncharacterized protein LOC661701|AUGUSTUS-3.0.2_10300|E3 ubiquitin-protein ligase TRIM37-like Protein|GLEAN_10300
456	LOC661120	4.01067	6.78568e-12	TcasGA2_TC011930	constitutive coactivator of PPAR-gamma-like protein 1	; constitutive coactivator of PPAR-gamma-like protein 1|AUGUSTUS-3.0.2_11930|GLEAN_11930
457	LOC662603	4.00923	0.00363057	TcasGA2_TC007439	protein cramped	; protein cramped|AUGUSTUS-3.0.2_07439|GLEAN_07439
458	LOC656719	4.00755	0.0368021	TcasGA2_TC010670	helicase ARIP4	; helicase ARIP4|AUGUSTUS-3.0.2_34871|GLEAN_10670
459	LOC662658	4.00527	1.41222e-06	TcasGA2_TC012702	4-hydroxyphenylpyruvate dioxygenase	; 4-hydroxyphenylpyruvate dioxygenase|4-hydroxyphenylpyruvate dioxygenase-like Protein|AUGUSTUS-3.0.2_12702|GLEAN_12702
460	LOC662166	4.00506	0.000284791		transducin beta-like protein 2	; LOW QUALITY PROTEIN: transducin beta-like protein 2
461	LOC659631	4.00501	0	TcasGA2_TC001118	adhesive plaque matrix protein	; adhesive plaque matrix protein|uncharacterized protein LOC659631|AUGUSTUS-3.0.2_01118|GLEAN_01118
462	LOC661947	3.98877	6.51541e-06	TcasGA2_TC011810	death-associated protein kinase-like	; death-associated protein kinase related|AUGUSTUS-3.0.2_31247|Death-associated protein kinase related-like Protein|GLEAN_11810
463	LOC660208	3.98752	1.11011e-09	TcasGA2_TC004367	tyrosine-protein kinase Fps85D	; tyrosine-protein kinase Fps85D|GLEAN_04367
464	LOC103313120	3.98727	0.0474588		zinc finger protein OZF	; zinc finger protein OZF|GLEAN_06843
465	LOC656846	3.98433	0	TcasGA2_TC007495	protein TIS11	; protein TIS11|AUGUSTUS-3.0.2_32794|GLEAN_07495|GLEAN_07496
466	LOC100141741	3.97624	0.0311005	TcasGA2_TC008806	endo-1,4-beta-xylanase A	; endo-1,4-beta-xylanase A|AUGUSTUS-3.0.2_08806|GLEAN_08806
467	LOC657382	3.96962	0.0157749	TcasGA2_TC001579	discoidin domain-containing receptor 2	; discoidin domain-containing receptor 2|AUGUSTUS-3.0.2_01579|GLEAN_01579
468	LOC662522	3.96728	7.45311e-05	TcasGA2_TC030663	factor VIII intron 22 protein	; factor VIII intron 22 protein|GLEAN_05901-OG20202
469	LOC655538	3.96563	0.0004437	TcasGA2_TC009778	lipoma HMGIC fusion partner-like 3 protein	; lipoma HMGIC fusion partner-like 3 protein|AUGUSTUS-3.0.2_09778|GLEAN_09778
470	LOC660923	3.96028	9.38583e-13	TcasGA2_TC002983	WW domain-containing adapter protein with coiled-coil	; WW domain-containing adapter protein with coiled-coil|AUGUSTUS-3.0.2_02983|GLEAN_02983
471	LOC103312116	3.95973	0.000358287	TcasGA2_TC002826	uncharacterized LOC103312116	; LOW QUALITY PROTEIN: uncharacterized protein LOC103312116|GLEAN_02826|GLEAN_02828
472	LOC662491	3.9597	8.94204e-10	TcasGA2_TC005448	mediator of RNA polymerase II transcription subunit 13	; mediator of RNA polymerase II transcription subunit 13|AUGUSTUS-3.0.2_34166|GLEAN_05448|GLEAN_05449|Mediator of RNA polymerase II transcription subunit 13-like Protein
473	LOC100141935	3.95804	3.26406e-14	TcasGA2_TC031718	nose resistant to fluoxetine protein 6	; nose resistant to fluoxetine protein 6|AUGUSTUS-3.0.2_31718|GLEAN_04059
474	LOC658231	3.95802	4.37189e-05	TcasGA2_TC001757	protein unc-50 homolog	; protein unc-50 homolog|AUGUSTUS-3.0.2_01757|GLEAN_01757|Protein unc-50 homolog-like Protein
475	LOC661993	3.95673	2.91488e-05	TcasGA2_TC010871	protein ABHD17B	; protein ABHD17B|AUGUSTUS-3.0.2_10871|Alpha/beta hydrolase domain-containing protein 17C-like Protein|GLEAN_10871|alpha/beta hydrolase domain-containing protein 17B
476	LOC661186	3.9509	0.00674875	TcasGA2_TC030590	uroporphyrinogen decarboxylase	; uroporphyrinogen decarboxylase|GLEAN_05183-OG11963
477	LOC663668	3.95072	0.039571	TcasGA2_TC009146	DNA replication licensing factor Mcm5	; LOW QUALITY PROTEIN: DNA replication licensing factor Mcm5|AUGUSTUS-3.0.2_34773|DNA replication licensing factor Mcm5-like protein|GLEAN_09146
478	LOC662789	3.94076	8.18296e-06	TcasGA2_TC001360	catenin alpha	; catenin alpha|similar to CG17947-PA|AUGUSTUS-3.0.2_01360|Catenin alpha-like Protein|GLEAN_01360
479	LOC661209	3.93914	0.00732252	TcasGA2_TC014294	FACT complex subunit spt16	; FACT complex subunit spt16|GLEAN_14294
480	LOC657327	3.93803	0.0165264	TcasGA2_TC007861	protein bark beetle	; protein bark beetle|AUGUSTUS-3.0.2_07861|GLEAN_07861
481	LOC662099	3.93578	0.0195232	TcasGA2_TC005370	bifunctional methylenetetrahydrofolate dehydrogenase/cyclohydrolase, mitochondrial	; bifunctional methylenetetrahydrofolate dehydrogenase/cyclohydrolase, mitochondrial|AUGUSTUS-3.0.2_05370|Bifunctional methylenetetrahydrofolate dehydrogenase/cyclohydrolase, mitochondrial-like Protein|GLEAN_05370
482	LOC658325	3.93423	0.0156449	TcasGA2_TC033285	glycine-rich cell wall structural protein 1.0	; glycine-rich cell wall structural protein 1.0|AUGUSTUS-3.0.2_33285|GLEAN_01784
483	LOC659598	3.92929	0.0386506	TcasGA2_TC006117	ran-specific GTPase-activating protein	; ran-specific GTPase-activating protein|AUGUSTUS-3.0.2_06117|GLEAN_06117|Ran-specific GTPase-activating protein-like Protein
484	LOC655327	3.92659	3.82262e-06		cellular tumor antigen p53	; cellular tumor antigen p53|AUGUSTUS-3.0.2_11559|GLEAN_11559|Tumor protein p73-like Protein
485	Phcl	3.92529	0.000103796	TcasGA2_TC000240	pH sensitive chloride channel	; pH-sensitive chloride channel|AUGUSTUS-3.0.2_32251|GLEAN_00240|Glutamate-gated chloride channel-like Protein
486	LOC659903	3.92329	0.00614419	TcasGA2_TC000780	dentin sialophosphoprotein	; dentin sialophosphoprotein|AUGUSTUS-3.0.2_00780|GLEAN_00780
487	LOC655891	3.92263	0.0200097	TcasGA2_TC016079	serine/threonine-protein kinase GL21140	; serine/threonine-protein kinase GL21140|AUGUSTUS-3.0.2_16079|GLEAN_16079|Serine/threonine-protein kinase CG17528-like Protein
488	LOC663768	3.9218	0.00265706	TcasGA2_TC008898	nucleoporin GLE1	; nucleoporin GLE1|AUGUSTUS-3.0.2_08898|GLEAN_08898|Nucleoporin GLE1-like Protein
489	LOC663735	3.91809	3.9968e-15	TcasGA2_TC011759	ubiquitin thioesterase trabid	; ubiquitin thioesterase trabid|AUGUSTUS-3.0.2_11759|GLEAN_11759|Ubiquitin thioesterase trabid-like Protein
490	LOC658435	3.91706	4.68898e-06	TcasGA2_TC015614	cytosolic 10-formyltetrahydrofolate dehydrogenase	; cytosolic 10-formyltetrahydrofolate dehydrogenase|similar to aldehyde dehydrogenase|AUGUSTUS-3.0.2_15614|Cytosolic 10-formyltetrahydrofolate dehydrogenase-like Protein|GLEAN_15614
491	LOC655756	3.91471	1.04681e-05	TcasGA2_TC002583	histone H2A	; histone H2A|AUGUSTUS-3.0.2_02583|GLEAN_02583|Histone H2A-like Protein
492	LOC103313545	3.91377	0.00212154	TcasGA2_TC009296	titin	; titin|AUGUSTUS-3.0.2_09296|GLEAN_09296
493	LOC655004	3.90518	0.0121507	TcasGA2_TC006082	ski oncogene	; ski oncogene|AUGUSTUS-3.0.2_33943|GLEAN_06082|GLEAN_06085
494	LOC661391	3.89785	0.0133953		UDP-glucuronosyltransferase-like	; UDP-glucuronosyltransferase-like
495	LOC103314890	3.89346	0.00751784	TcasGA2_TC004033	hypothetical protein	; uncharacterized protein LOC103314890|AUGUSTUS-3.0.2_04033|GLEAN_04033
496	LOC661862	3.89248	0.000172226	TcasGA2_TC012690	inositol-trisphosphate 3-kinase A	; inositol-trisphosphate 3-kinase A|AUGUSTUS-3.0.2_12690|AUGUSTUS-3.0.2_12691|GLEAN_12690|GLEAN_12691|Inositol-trisphosphate 3-kinase A-like Protein
497	LOC663995	3.89138	0.0175712	TcasGA2_TC013346, Myo7A	myosin 7A	; myosin-VIIa|GLEAN_13346
498	LOC658771	3.88753	0.000114003	TcasGA2_TC011196	myrosinase 1	; myrosinase 1|AUGUSTUS-3.0.2_11196|GLEAN_11196|Myrosinase 1-like Protein
499	LOC103314417	3.8781	0.0155538	TcasGA2_TC011134	acyl-coenzyme A thioesterase 13	; acyl-coenzyme A thioesterase 13|AUGUSTUS-3.0.2_11134|Acyl-coenzyme A thioesterase 13-like Protein|GLEAN_11134
500	LOC103312455	3.87495	1.17351e-12	TcasGA2_TC003818	poly(A) polymerase type 3	; poly(A) polymerase type 3|AUGUSTUS-3.0.2_03818|GLEAN_03818|Poly(A) polymerase gamma-like Protein
501	LOC659239	3.8739	0	TcasGA2_TC007213	Krueppel homolog 2	; Krueppel homolog 2|AUGUSTUS-3.0.2_07213|GLEAN_07213|Krueppel homolog 2-like Protein
502	LOC662383	3.86962	0.0155579	TcasGA2_TC006159	protein msta, isoform B	; protein msta, isoform B|AUGUSTUS-3.0.2_06159|GLEAN_06159|Protein msta, isoform A-like Protein
503	LOC100216359	3.86573	0.00028938	TcasGA2_TC005428, Ast-C	allatotropin II preprohormone	; allatotropin II preprohormone|AUGUSTUS-3.0.2_05428|GLEAN_05428|allatostatin-C
504	LOC656762	3.86219	0	TcasGA2_TC013629	nuclear pore complex protein Nup98-Nup96	; nuclear pore complex protein Nup98-Nup96|AUGUSTUS-3.0.2_13629|GLEAN_13629
505	LOC103312636	3.86181	0.00712384	TcasGA2_TC014974	zinc finger protein 493	; zinc finger protein 493|AUGUSTUS-3.0.2_14974|GLEAN_14974|Zinc finger protein 619-like Protein
506	LOC659198	3.85807	0.00026471	TcasGA2_TC012491	vacuolar protein sorting-associated protein 13B	; vacuolar protein sorting-associated protein 13B|AUGUSTUS-3.0.2_12491|GLEAN_12491|Vacuolar protein sorting-associated protein 13B-like Protein
507	LOC103313165	3.85698	2.52826e-05	TcasGA2_TC013326, P140	venom protease	; venom protease|GLEAN_13326|serine protease P140
508	LOC656201	3.85491	5.20503e-07	TcasGA2_TC006055	TAR DNA-binding protein 43	; TAR DNA-binding protein 43|AUGUSTUS-3.0.2_06055|GLEAN_06055|TAR DNA-binding protein 43-like Protein
509	LOC656159	3.85388	0.00579959	TcasGA2_TC011313	gamma-glutamyltransferase 7	; gamma-glutamyltransferase 7|AUGUSTUS-3.0.2_11313|GLEAN_11313|Gamma-glutamyltransferase 7-like Protein
510	LOC661988	3.85058	0.0313071	TcasGA2_TC006585	uncharacterized LOC661988	; uncharacterized protein LOC661988|AUGUSTUS-3.0.2_06587|GLEAN_06585|GLEAN_06587
511	LOC656506	3.841	7.63675e-07	TcasGA2_TC004018	puratrophin-1	; puratrophin-1|uncharacterized protein LOC656506|GLEAN_04018
512	LOC655802	3.83941	0.000992926	TcasGA2_TC010921	ankyrin repeat domain-containing protein 39	; ankyrin repeat domain-containing protein 39|uncharacterized protein LOC655802|AUGUSTUS-3.0.2_31135|GLEAN_10921|GLEAN_10922|Tankyrase-like Protein
513	LOC103313455	3.83834	0.0209988	TcasGA2_TC033467	protein takeout-like	; protein takeout-like|AUGUSTUS-3.0.2_33467|Protein takeout-like Protein
514	LOC660631	3.83457	0.000492088	TcasGA2_TC001631	protein lap1	; protein lap1|AUGUSTUS-3.0.2_01631|GLEAN_01631|Protein lap1-like Protein
515	LOC103312123	3.83369	0.0195815	TcasGA2_TC016198	fidgetin-like protein 1	; fidgetin-like protein 1|AUGUSTUS-3.0.2_16198|GLEAN_16198
516	LOC661441	3.83297	0.0459561	TcasGA2_TC012861	tRNA methyltransferase 10 homolog A	; tRNA methyltransferase 10 homolog A|AUGUSTUS-3.0.2_12861|GLEAN_12861|tRNA methyltransferase 10 homolog A-like Protein
517	LOC657641	3.83113	0.00138581	TcasGA2_TC003856	SET and MYND domain-containing protein 4	; SET and MYND domain-containing protein 4|AUGUSTUS-3.0.2_03856|GLEAN_03856|SET and MYND domain-containing protein 4-like Protein
518	LOC103314850	3.8306	0.00132437	TcasGA2_TC015900	SAGA-associated factor 11 homolog	; SAGA-associated factor 11 homolog|AUGUSTUS-3.0.2_15900|GLEAN_15900|SAGA-associated factor 11 homolog-like Protein
519	LOC662763	3.82971	0	TcasGA2_TC007692	high mobility group protein DSP1	; high mobility group protein DSP1|AUGUSTUS-3.0.2_07692|GLEAN_07692|High mobility group protein DSP1-like Protein
520	LOC657123	3.82887	0.00625802	TcasGA2_TC012341	WAS/WASL-interacting protein family member 2	; WAS/WASL-interacting protein family member 2|AUGUSTUS-3.0.2_12341|GLEAN_12341
521	LOC655290	3.82881	0.0267622	TcasGA2_TC009586	nuclear transcription factor Y subunit gamma	; nuclear transcription factor Y subunit gamma|AUGUSTUS-3.0.2_09586|GLEAN_09586|Nuclear transcription factor Y subunit gamma-like Protein
522	LOC664097	3.82275	0.00574044	TcasGA2_TC005702	polypeptide N-acetylgalactosaminyltransferase 1	; polypeptide N-acetylgalactosaminyltransferase 1|GLEAN_05702|Polypeptide N-acetylgalactosaminyltransferase 3-like Protein
523	LOC100141923	3.82177	0.013517		sodium-coupled monocarboxylate transporter 2-like	; sodium-coupled monocarboxylate transporter 2-like
524	LOC657256	3.81994	0.000100449	TcasGA2_TC032858	protein cornichon homolog 4	; protein cornichon homolog 4|AUGUSTUS-3.0.2_32858|Protein cornichon-like Protein
525	LOC107398814	3.81725	0.00169602		uncharacterized LOC107398814	; uncharacterized protein LOC107398814
526	LOC103314483	3.81697	0.0188965	TcasGA2_TC011013	INO80 complex subunit B	; INO80 complex subunit B|AUGUSTUS-3.0.2_11013|GLEAN_11013|INO80 complex subunit B-like Protein
527	Chi-5	3.81559	2.68874e-12	TcasGA2_TC009179, TcChi-5	chitinase 5	; chitinase 5|AUGUSTUS-3.0.2_09179|GLEAN_09179|putative chitinase 3-like Protein
528	LOC662060	3.81047	0.0166162	TcasGA2_TC006245	transcription elongation factor SPT4	; transcription elongation factor SPT4|AUGUSTUS-3.0.2_06245|GLEAN_06245|Transcription elongation factor SPT4-like Protein
529	LOC662950	3.79778	0.0370742	TcasGA2_TC010763	protein eva-1 homolog C	; protein eva-1 homolog C|uncharacterized protein LOC662950|AUGUSTUS-3.0.2_10763|GLEAN_10763
530	LOC657211	3.79559	0.000403857	TcasGA2_TC012342	sn1-specific diacylglycerol lipase beta	; sn1-specific diacylglycerol lipase beta|AUGUSTUS-3.0.2_12342|GLEAN_12342|Sn1-specific diacylglycerol lipase beta-like Protein
531	LOC659298	3.78651	0.00202687	TcasGA2_TC011391	chondroitin sulfate N-acetylgalactosaminyltransferase 1	; chondroitin sulfate N-acetylgalactosaminyltransferase 1|AUGUSTUS-3.0.2_31393|GLEAN_11391|GLEAN_11392
532	LOC662608	3.78285	6.20906e-05	TcasGA2_TC013135	endocuticle structural glycoprotein SgAbd-4	; endocuticle structural glycoprotein SgAbd-4|GLEAN_13135
533	Parp	3.78239	0.00771711	TcasGA2_TC003717	poly-(ADP-ribose) polymerase	; poly-(ADP-ribose) polymerase|AUGUSTUS-3.0.2_03717|GLEAN_03717|Poly [ADP-ribose] polymerase-like Protein
534	LOC661639	3.78143	2.81175e-05	TcasGA2_TC013150	GPI transamidase component PIG-T	; GPI transamidase component PIG-T|GLEAN_13150
535	LOC661826	3.77818	0.00217166	TcasGA2_TC004465	collagen and calcium-binding EGF domain-containing protein 1	; collagen and calcium-binding EGF domain-containing protein 1|AUGUSTUS-3.0.2_32018|Collagen and calcium-binding EGF domain-containing protein 1-like Protein|GLEAN_04465
536	LOC657551	3.77781	0.00399428	TcasGA2_TC011468	mortality factor 4-like protein 1	; mortality factor 4-like protein 1|GLEAN_11468|NuA4 complex subunit EAF3 homolog-like Protein
537	LOC659029	3.77699	1.88687e-11	TcasGA2_TC006471	long-chain-fatty-acid--CoA ligase 5	; long-chain-fatty-acid--CoA ligase 5|AUGUSTUS-3.0.2_06471|GLEAN_06471|Very long-chain-fatty-acid--CoA ligase bubblegum-like Protein
538	LOC654967	3.77175	0.0158184	TcasGA2_TC011043	polycomb protein Scm	; polycomb protein Scm|AUGUSTUS-3.0.2_11043|GLEAN_11043|Polycomb protein Scm-like Protein
539	LOC103314504	3.77014	1.54066e-05	TcasGA2_TC010326	choline transporter-like protein 1	; choline transporter-like protein 1|AUGUSTUS-3.0.2_34628|GLEAN_10326
540	LOC661688	3.7667	0.0332718	TcasGA2_TC010153	WD repeat-containing protein 20	; WD repeat-containing protein 20|AUGUSTUS-3.0.2_10153|GLEAN_10153|WD repeat-containing protein 20-like Protein
541	LOC103314523	3.76461	0.000338112	TcasGA2_TC001694	uncharacterized LOC103314523	; uncharacterized protein LOC103314523|AUGUSTUS-3.0.2_01694|GLEAN_01694
542	LOC663447	3.7628	0.00019879	TcasGA2_TC000676	fatty-acid amide hydrolase 2-B	; fatty-acid amide hydrolase 2-B|AUGUSTUS-3.0.2_00676|Fatty-acid amide hydrolase 2-like Protein|GLEAN_00676
543	LOC658072	3.76113	0.0146372	TcasGA2_TC010503	kazrin	; kazrin|AUGUSTUS-3.0.2_10503|GLEAN_10503
544	LOC655751	3.76109	0.0111562	TcasGA2_TC002878	glutathione S-transferase	; glutathione S-transferase|AUGUSTUS-3.0.2_02878|GLEAN_02878|Glutathione S-transferase S1-like Protein
545	LOC660411	3.76009	0.000216108	TcasGA2_TC007074	ATP-binding cassette sub-family G member 1	; ATP-binding cassette sub-family G member 1|AUGUSTUS-3.0.2_07074|GLEAN_07074|Protein white-like Protein
546	LOC656145	3.75851	0.0313844	TcasGA2_TC031831	neurogenic locus notch homolog protein 1	; delta and Notch-like epidermal growth factor-related receptor|neurogenic locus notch homolog protein 1|AUGUSTUS-3.0.2_31831|AUGUSTUS-3.0.2_31833|GLEAN_01966|GLEAN_01967|Neurogenic locus Notch protein-like Protein
547	LOC658494	3.75626	1.81204e-11	TcasGA2_TC003971	band 7 protein AGAP004871	; band 7 protein AGAP004871|AUGUSTUS-3.0.2_03971|Band 7 protein CG42540-like Protein|GLEAN_03971
548	LOC663946	3.74599	0.0276855	TcasGA2_TC013348	nuclear cap-binding protein subunit 2	; nuclear cap-binding protein subunit 2|AUGUSTUS-3.0.2_13348|GLEAN_13348|Nuclear cap-binding protein subunit 2-like Protein
549	LOC663225	3.74531	0.000262433	TcasGA2_TC008078	protein arginine N-methyltransferase 1	; protein arginine N-methyltransferase 1|AUGUSTUS-3.0.2_08078|GLEAN_08078|putative histone-arginine methyltransferase CARMER-like Protein
550	LOC654854	3.74041	0.0354533	TcasGA2_TC000949	BTB/POZ domain-containing protein 17	; BTB/POZ domain-containing protein 17|AUGUSTUS-3.0.2_00949|BTB/POZ domain-containing protein 17-like Protein|GLEAN_00949
551	LOC662312	3.74012	0.00312711	TcasGA2_TC005903	CDK5RAP1-like protein	; CDK5RAP1-like protein|AUGUSTUS-3.0.2_05903|GLEAN_05903
552	LOC103313818	3.73683	0.048247	TcasGA2_TC033874	uncharacterized LOC103313818	; uncharacterized protein LOC103313818|AUGUSTUS-3.0.2_33874
553	Star	3.73527	0.0196777	TcasGA2_TC012408	star protein	; star protein|AUGUSTUS-3.0.2_12408
554	LOC100142384	3.73523	0.00173531	TcasGA2_TC013254	rab-like protein 3	; rab-like protein 3|GLEAN_13254
555	LOC662254	3.73468	9.33865e-08	TcasGA2_TC008293	ATP-binding cassette sub-family G member 4	; ATP-binding cassette sub-family G member 4|AUGUSTUS-3.0.2_08293|GLEAN_08293|Protein white-like Protein
556	LOC664558	3.73445	5.30107e-10	TcasGA2_TC008220	eukaryotic translation initiation factor 3 subunit F-1	; eukaryotic translation initiation factor 3 subunit F-1|AUGUSTUS-3.0.2_08220|Eukaryotic translation initiation factor 3 subunit F-1-like Protein|GLEAN_08220
557	LOC661684	3.71701	1.20592e-07	TcasGA2_TC015428	short-chain specific acyl-CoA dehydrogenase, mitochondrial	; short-chain specific acyl-CoA dehydrogenase, mitochondrial|AUGUSTUS-3.0.2_15428|GLEAN_15428|putative medium-chain specific acyl-CoA dehydrogenase, mitochondrial-like Protein
558	LOC656028	3.70442	2.42485e-05	TcasGA2_TC006189	interaptin	; interaptin|AUGUSTUS-3.0.2_06189|GLEAN_06189
559	LOC659473	3.70139	0.016589	TcasGA2_TC006033, P68	proclotting enzyme	; proclotting enzyme|serine proteinase stubble|transmembrane protease serine 2|AUGUSTUS-3.0.2_06033|GLEAN_06033|serine protease P68
560	LOC663947	3.69759	0.0227703	TcasGA2_TC014728	inactive dipeptidyl peptidase 10	; inactive dipeptidyl peptidase 10|GLEAN_14728
561	Pho	3.6914	2.43722e-05	TcasGA2_TC015577, GLEAN_15577	pleiohomeotic	; pleiohomeotic|AUGUSTUS-3.0.2_15577
562	LOC663240	3.68121	0.0398665	TcasGA2_TC006793	protein lethal(2)essential for life	; protein lethal(2)essential for life|AUGUSTUS-3.0.2_06793|GLEAN_06793|Protein lethal(2)essential for life-like Protein
563	LOC659720	3.67858	0.000599016	TcasGA2_TC014208	cysteine protease ATG4D	; cysteine protease ATG4D|similar to CG6194-PA|AUGUSTUS-3.0.2_14208|Cysteine protease ATG4D-like Protein|GLEAN_14208
564	LOC660154	3.67845	9.43545e-09	TcasGA2_TC004721, PEVK	projectin	; twitchin|AUGUSTUS-3.0.2_04721|GLEAN_04721|Twitchin-like Protein
565	LOC660725	3.67807	0.0277553	TcasGA2_TC008690	28S ribosomal protein S17, mitochondrial	; 28S ribosomal protein S17, mitochondrial|28S ribosomal protein S17, mitochondrial-like Protein|AUGUSTUS-3.0.2_08690|GLEAN_08690
566	LOC657198	3.67302	0.0335397	TcasGA2_TC009289	prostaglandin reductase 1	; prostaglandin reductase 1|AUGUSTUS-3.0.2_09289|GLEAN_09289|Prostaglandin reductase 1-like Protein
567	LOC664344	3.67093	0.000269	TcasGA2_TC007512	Hermansky-Pudlak syndrome 5 protein homolog	; Hermansky-Pudlak syndrome 5 protein homolog|AUGUSTUS-3.0.2_07512|GLEAN_07512
568	LOC664231	3.66616	0.0141241	TcasGA2_TC007976	general transcription factor IIH subunit 1	; general transcription factor IIH subunit 1|AUGUSTUS-3.0.2_07976|GLEAN_07976|General transcription factor IIH subunit 1-like Protein
569	LOC659773	3.66156	8.08257e-10	TcasGA2_TC003795	sodium/hydrogen exchanger 3	; sodium/hydrogen exchanger 3|GLEAN_03795|GLEAN_03796
570	LOC658949	3.65995	0.00138678	TcasGA2_TC008971	lipoma HMGIC fusion partner-like 2 protein	; lipoma HMGIC fusion partner-like 2 protein|AUGUSTUS-3.0.2_08971|GLEAN_08971
571	LOC656959	3.65953	0.0366992	TcasGA2_TC006321	uncharacterized LOC656959	; uncharacterized protein LOC656959|AUGUSTUS-3.0.2_34041|GLEAN_06321|GLEAN_06322
572	LOC657220	3.65945	0	TcasGA2_TC010977	elongation of very long chain fatty acids protein AAEL008004	; elongation of very long chain fatty acids protein AAEL008004|AUGUSTUS-3.0.2_10977|Elongation of very long chain fatty acids protein AAEL008004-like Protein|GLEAN_10977
573	LOC662783	3.65784	0.0104284	TcasGA2_TC012587	probable isocitrate dehydrogenase [NAD] subunit beta, mitochondrial	; probable isocitrate dehydrogenase [NAD] subunit beta, mitochondrial|AUGUSTUS-3.0.2_12587|GLEAN_12587|putative isocitrate dehydrogenase [NAD] subunit alpha, mitochondrial-like Protein
574	LOC107398166	3.65714	0.035224	TcasGA2_TC034775	uncharacterized LOC107398166	; uncharacterized protein LOC107398166|AUGUSTUS-3.0.2_34775|Ecdysteroid UDP-glucosyltransferase-like protein
575	LOC664388	3.656	2.86374e-07	TcasGA2_TC008834	N-terminal kinase-like protein	; N-terminal kinase-like protein|AUGUSTUS-3.0.2_08834|GLEAN_08834
576	LOC100142577	3.65439	0.00877295		synaptic vesicle glycoprotein 2B-like	; synaptic vesicle glycoprotein 2B-like
577	LOC658819	3.64537	1.36037e-10	TcasGA2_TC012429	E3 ubiquitin-protein ligase RNF185	; E3 ubiquitin-protein ligase RNF185|AUGUSTUS-3.0.2_12429|E3 ubiquitin-protein ligase RNF185-like Protein|GLEAN_12429
578	LOC658753	3.64405	0.000350882		isoleucine--tRNA ligase, mitochondrial	; isoleucine--tRNA ligase, mitochondrial|AUGUSTUS-3.0.2_02282|GLEAN_02282|Isoleucine--tRNA ligase-like protein, mitochondrial
579	LOC662094	3.63936	1.01695e-09	TcasGA2_TC009838	thrombospondin type-1 domain-containing protein 4	; thrombospondin type-1 domain-containing protein 4|AUGUSTUS-3.0.2_33708|AUGUSTUS-3.0.2_33709|GLEAN_09838|Papilin-like Protein
580	LOC664062	3.63829	5.36399e-09	TcasGA2_TC000675	fatty-acid amide hydrolase 2-B	; fatty-acid amide hydrolase 2-B|AUGUSTUS-3.0.2_00675|Fatty-acid amide hydrolase 2-like Protein|GLEAN_00675
581	LOC659746	3.63721	0.045542		phosphatidylinositol 4,5-bisphosphate 5-phosphatase A	; phosphatidylinositol 4,5-bisphosphate 5-phosphatase A|AUGUSTUS-3.0.2_02268|GLEAN_02268|Phosphatidylinositol 4,5-bisphosphate 5-phosphatase A-like Protein
582	LOC658486	3.63716	0.00417862	TcasGA2_TC000451	hypothetical protein	; uncharacterized protein LOC658486|AUGUSTUS-3.0.2_00451|GLEAN_00451
583	LOC656559	3.63459	0.0108161	TcasGA2_TC016355	glucose dehydrogenase [FAD, quinone]	; glucose dehydrogenase [FAD, quinone]|AUGUSTUS-3.0.2_16355|GLEAN_16355|Glucose dehydrogenase [FAD, quinone]-like Protein
584	LOC655518	3.63396	0.0016186	TcasGA2_TC030745	WD repeat-containing and planar cell polarity effector protein fritz	; WD repeat-containing and planar cell polarity effector protein fritz|AUGUSTUS-3.0.2_30745|GLEAN_07658-OG5698|WD repeat-containing and planar cell polarity effector protein fritz-like Protein
585	LOC658211	3.63362	7.94787e-06	TcasGA2_TC015466	uncharacterized LOC658211	; uncharacterized protein LOC658211|AUGUSTUS-3.0.2_15466|GLEAN_15466|Proton-coupled folate transporter-like Protein
586	LOC659708	3.63205	0.010751	TcasGA2_TC003389	pentatricopeptide repeat-containing protein 1, mitochondrial	; pentatricopeptide repeat-containing protein 1, mitochondrial|AUGUSTUS-3.0.2_03389|GLEAN_03389|Pentatricopeptide repeat-containing protein 1, mitochondrial-like Protein
587	LOC659434	3.62822	1.33484e-05	TcasGA2_TC004713, DFR1, heartless, htl	fibroblast growth factor receptor homolog 1	; fibroblast growth factor receptor homolog 1|AUGUSTUS-3.0.2_04713|GLEAN_04713
588	LOC660036	3.62441	0.0494629	TcasGA2_TC003798	uncharacterized LOC660036	; uncharacterized protein LOC660036|AUGUSTUS-3.0.2_03798|GLEAN_03798|sperm surface protein Sp17
589	LOC655688	3.62348	0.000747571	TcasGA2_TC015676	sodium/potassium-transporting ATPase subunit beta-1	; sodium/potassium-transporting ATPase subunit beta-1|GLEAN_15676
590	LOC661345	3.62168	0.000808288	TcasGA2_TC011820	ATP-dependent RNA helicase DHX8	; ATP-dependent RNA helicase DHX8|ATP-dependent RNA helicase DHX8-like Protein|AUGUSTUS-3.0.2_11820|GLEAN_11820
591	LOC659197	3.62054	0.0148387	TcasGA2_TC012039	nitrogen permease regulator 3-like protein	; nitrogen permease regulator 3-like protein|AUGUSTUS-3.0.2_12039|GLEAN_12039
592	LOC103314891	3.62038	0.0184301		uncharacterized LOC103314891
593	LOC103312751	3.61963	0.011295	TcasGA2_TC016104	uncharacterized LOC103312751	; uncharacterized protein LOC103312751|AUGUSTUS-3.0.2_16104|GLEAN_16104
594	LOC659629	3.61941	2.85592e-07		protein lap4-like	; protein lap4-like
595	LOC655779	3.60493	0.00313947	TcasGA2_TC015811	prostatic acid phosphatase	; prostatic acid phosphatase|AUGUSTUS-3.0.2_15811|GLEAN_15811|Prostatic acid phosphatase-like Protein
596	LOC100141638	3.60214	0.00614424	TcasGA2_TC013009	protein outspread	; protein outspread|GLEAN_13009|GLEAN_13010
597	LOC663859	3.60048	0.00296811	TcasGA2_TC000872	regulator of nonsense transcripts 3A	; regulator of nonsense transcripts 3A|AUGUSTUS-3.0.2_00872|GLEAN_00872
598	LOC103314776	3.5981	0.000285258		uncharacterized LOC103314776	; uncharacterized protein LOC103314776|AUGUSTUS-3.0.2_02081|GLEAN_02081
599	LOC656415	3.59791	0.0350251	TcasGA2_TC003570, shaven, sv	paired box protein Pax-5	; paired box protein Pax-5|AUGUSTUS-3.0.2_03570|GLEAN_03570
600	LOC103315129	3.59057	0.0294622	TcasGA2_TC032049	leucine-rich repeat-containing protein 15-like	; leucine-rich repeat-containing protein 15-like|AUGUSTUS-3.0.2_32049
601	LOC660586	3.58746	0.000243015	TcasGA2_TC000308	insulin-degrading enzyme	; insulin-degrading enzyme|GLEAN_00308
602	LOC655842	3.58559	1.33075e-10	TcasGA2_TC003754	ral guanine nucleotide dissociation stimulator-like 1	; ral guanine nucleotide dissociation stimulator-like 1|AUGUSTUS-3.0.2_03754|GLEAN_03754
603	V	3.58287	0.012405	TcasGA2_TC008028, TDO, TO, TRPO, Tcv	tryptophan oxygenase	; tryptophan 2,3-dioxygenase|AUGUSTUS-3.0.2_08028|GLEAN_08028|Tryptamin 2,3-dioxygenase|Tryptophan 2,3-dioxygenase-like Protein|Tryptophan pyrrolase|Tryptophanase|vermilion
604	LOC656856	3.5823	0.000588996	TcasGA2_TC015379	putative fatty acyl-CoA reductase CG5065	; putative fatty acyl-CoA reductase CG5065|AUGUSTUS-3.0.2_15379|GLEAN_15379|Putative fatty acyl-CoA reductase CG5065-like Protein
605	LOC658431	3.58056	3.72572e-08	TcasGA2_TC014806	zinc finger protein 845	; zinc finger protein 208|zinc finger protein 845|zinc finger protein Xfin|AUGUSTUS-3.0.2_14806|GLEAN_14806|suppressor of presenilin protein 4
606	LOC664321	3.58016	0.0384357	TcasGA2_TC007103	nitrilase and fragile histidine triad fusion protein NitFhit	; nitrilase and fragile histidine triad fusion protein NitFhit|similar to nitrilase and fragile histidine triad fusion protein NitFhit|AUGUSTUS-3.0.2_07103|GLEAN_07103|Nitrilase and fragile histidine triad fusion protein NitFhit-like Protein
607	LOC655884	3.57632	4.65403e-08	TcasGA2_TC001722, Svp	seven up	; nuclear receptor subfamily 2 group F member 1-A|steroid receptor seven-up, isoforms B/C|uncharacterized protein LOC655884|AUGUSTUS-3.0.2_01722|GLEAN_01722
608	LOC656346	3.57492	0.00212527	TcasGA2_TC013878	plexin domain-containing protein 2	; plexin domain-containing protein 2|AUGUSTUS-3.0.2_13878|GLEAN_13878|Plexin domain-containing protein 2-like Protein
609	LOC100142606	3.5705	0.000150319	TcasGA2_TC006681	uncharacterized LOC100142606	; uncharacterized protein LOC100142606|AUGUSTUS-3.0.2_06681|AUGUSTUS-3.0.2_06684|AUGUSTUS-3.0.2_06685|GLEAN_06681|GLEAN_06683|GLEAN_06684|GLEAN_06685
610	LOC103314188	3.56868	0.0226779	TcasGA2_TC012324	ER membrane protein complex subunit 6	; ER membrane protein complex subunit 6|ER membrane protein complex subunit 6-like Protein|GLEAN_12324
611	LOC103314102	3.56663	0.0213912	TcasGA2_TC006704	E3 ubiquitin-protein ligase SMURF2	; E3 ubiquitin-protein ligase SMURF2|AUGUSTUS-3.0.2_06704|E3 ubiquitin-protein ligase Smurf1-like Protein|GLEAN_06704
612	LOC656221	3.56472	0.00105024	TcasGA2_TC015976	hepatocyte growth factor-regulated tyrosine kinase substrate	; hepatocyte growth factor-regulated tyrosine kinase substrate|AUGUSTUS-3.0.2_15976|GLEAN_15976|Hepatocyte growth factor-regulated tyrosine kinase substrate-like Protein
613	LOC660533	3.56456	4.00357e-10	TcasGA2_TC003987	titin	; titin|AUGUSTUS-3.0.2_30701|AUGUSTUS-3.0.2_32674|AUGUSTUS-3.0.2_32675|GLEAN_03987|GLEAN_03988|GLEAN_03989-OG25|GLEAN_03989-OG3549|SEC14 domain and spectrin repeat-containing protein 1-like Protein
614	LOC656280	3.56341	0.000385374	TcasGA2_TC009294	N6-adenosine-methyltransferase 70 kDa subunit	; N6-adenosine-methyltransferase 70 kDa subunit|AUGUSTUS-3.0.2_09294|GLEAN_09294|putative N6-adenosine-methyltransferase MT-A70-like protein
615	LOC103312667	3.56215	0.0315957	TcasGA2_TC007424	uncharacterized LOC103312667	; uncharacterized protein LOC103312667|AUGUSTUS-3.0.2_07424|GLEAN_07424
616	LOC657677	3.56142	0.0387825	TcasGA2_TC016196	probable ATP-dependent RNA helicase CG8611	; probable ATP-dependent RNA helicase CG8611|AUGUSTUS-3.0.2_16196|GLEAN_16196|putative ATP-dependent RNA helicase CG8611-like Protein
617	LOC656211	3.56051	0.000589261	TcasGA2_TC011654	cGMP-specific 3',5'-cyclic phosphodiesterase	; cGMP-specific 3',5'-cyclic phosphodiesterase|AUGUSTUS-3.0.2_11654|GLEAN_11654|cGMP-specific 3',5'-cyclic phosphodiesterase-like Protein
618	LOC103314560	3.55877	8.62283e-09	TcasGA2_TC031683	uncharacterized LOC103314560	; uncharacterized protein LOC103314560|AUGUSTUS-3.0.2_31683|GLEAN_02304
619	LOC103312535	3.55464	0.000869232	TcasGA2_TC032724	nose resistant to fluoxetine protein 6-like	; nose resistant to fluoxetine protein 6-like|AUGUSTUS-3.0.2_32724|Nose resistant to fluoxetine protein 6-like Protein
620	LOC661152	3.55218	0.0331041	TcasGA2_TC013412	protein D3	; protein D3|AUGUSTUS-3.0.2_13412|GLEAN_13412|Putative odorant-binding protein A5-like Protein
621	LOC662331	3.54992	0.0397023	TcasGA2_TC007176	zinc finger protein 622	; zinc finger protein 622|AUGUSTUS-3.0.2_07176|GLEAN_07176|Zinc finger protein 622-like Protein
622	LOC655943	3.54917	8.30601e-05	TcasGA2_TC015596	sn1-specific diacylglycerol lipase alpha	; sn1-specific diacylglycerol lipase alpha|AUGUSTUS-3.0.2_33401|GLEAN_15596|GLEAN_15597
623	LOC107398734	3.5452	0.0051438		nose resistant to fluoxetine protein 6-like	; nose resistant to fluoxetine protein 6-like
624	LOC654993	3.53713	0.00920084	TcasGA2_TC013211	transmembrane protein 242	; transmembrane protein 242|GLEAN_13211
625	LOC663402	3.51825	0.00143477	TcasGA2_TC014700	membrane metallo-endopeptidase-like 1	; membrane metallo-endopeptidase-like 1|AUGUSTUS-3.0.2_14700
626	LOC656971	3.51455	0.000494808	TcasGA2_TC001746	phospholipid scramblase 2	; phospholipid scramblase 2|AUGUSTUS-3.0.2_01746|GLEAN_01746|Phospholipid scramblase 2-like Protein
627	LOC659956	3.5138	3.39942e-05		lysosomal thioesterase PPT2 homolog	; lysosomal thioesterase PPT2 homolog|AUGUSTUS-3.0.2_12908|GLEAN_12908|Lysosomal thioesterase PPT2 homolog-like Protein
628	LOC659791	3.51076	1.72979e-11	TcasGA2_TC015702	alpha-tocopherol transfer protein-like	; alpha-tocopherol transfer protein-like|AUGUSTUS-3.0.2_15702|Clavesin-2-like Protein|GLEAN_15702
629	LOC659596	3.50882	0.0034343	TcasGA2_TC009610	uncharacterized LOC659596	; uncharacterized protein LOC659596|GLEAN_09610
630	LOC659139	3.49268	0.00298899		E3 ubiquitin-protein ligase RING1	; E3 ubiquitin-protein ligase RING1|AUGUSTUS-3.0.2_01392|E3 ubiquitin-protein ligase RING1-like Protein|GLEAN_01392
631	LOC657373	3.49117	0.0459651	TcasGA2_TC031747	low molecular weight phosphotyrosine protein phosphatase 1-like	; low molecular weight phosphotyrosine protein phosphatase 1-like|AUGUSTUS-3.0.2_31747|Low molecular weight phosphotyrosine protein phosphatase 2-like Protein
632	LOC664008	3.48943	0	TcasGA2_TC012750	zinc transporter ZIP13 homolog	; zinc transporter ZIP13 homolog|AUGUSTUS-3.0.2_12751|GLEAN_12750|GLEAN_12751|Zinc transporter ZIP13 homolog-like Protein
633	LOC662878	3.47677	4.57818e-08	TcasGA2_TC013128	endocuticle structural glycoprotein SgAbd-8	; endocuticle structural glycoprotein SgAbd-8|GLEAN_13128
634	LOC662521	3.4748	0.00317751	TcasGA2_TC006162	myeloid leukemia factor	; myeloid leukemia factor|AUGUSTUS-3.0.2_06162|GLEAN_06162|Myeloid leukemia factor-like Protein
635	LOC100142080	3.46986	0.047779	TcasGA2_TC012118	calcium homeostasis endoplasmic reticulum protein	; calcium homeostasis endoplasmic reticulum protein|AUGUSTUS-3.0.2_12118|Calcium homeostasis endoplasmic reticulum protein-like Protein|GLEAN_12118
636	LOC662368	3.46437	0.0262775	TcasGA2_TC007585	splicing factor 3A subunit 2	; splicing factor 3A subunit 2|AUGUSTUS-3.0.2_07585|GLEAN_07585|Splicing factor 3A subunit 2-like Protein
637	LOC655162	3.45688	5.39597e-05		KAT8 regulatory NSL complex subunit 1	; KAT8 regulatory NSL complex subunit 1|AUGUSTUS-3.0.2_02076|GLEAN_02076
638	Torso	3.45452	0.0233401	TcasGA2_TC009906, tor	receptor tyrosine kinase Torso-like protein	; receptor tyrosine kinase Torso-like protein|AUGUSTUS-3.0.2_09906|GLEAN_09906
639	LOC103313093	3.45174	0.00275083	TcasGA2_TC033113	ribonuclease P protein subunit p30	; ribonuclease P protein subunit p30|AUGUSTUS-3.0.2_33113|Ribonuclease P protein subunit p30-like Protein
640	LOC660175	3.44864	0.00091459	TcasGA2_TC013416, P142	serine protease snake	; serine protease snake|GLEAN_13416|serine protease P142
641	LOC103314873	3.44474	2.02704e-08	TcasGA2_TC001612	G protein alpha i subunit	; G protein alpha i subunit|AUGUSTUS-3.0.2_01612|G protein alpha i subunit-like Protein|GLEAN_01612
642	LOC658681	3.44219	0.0157522	TcasGA2_TC006040	homeobox protein PKNOX2	; homeobox protein PKNOX2|AUGUSTUS-3.0.2_06040|GLEAN_06040
643	LOC657800	3.43527	0.000233683	TcasGA2_TC013872	vacuolar protein sorting-associated protein 37A	; vacuolar protein sorting-associated protein 37A|AUGUSTUS-3.0.2_13872|GLEAN_13872|Vacuolar protein sorting-associated protein 37A-like Protein
644	LOC664100	3.43171	0.000450159	TcasGA2_TC003525	TOM1-like protein 2	; TOM1-like protein 2|AUGUSTUS-3.0.2_03525|GLEAN_03525
645	LOC657479	3.42832	0.0027505	TcasGA2_TC032502	calcitonin gene-related peptide type 1 receptor	; calcitonin gene-related peptide type 1 receptor|AUGUSTUS-3.0.2_32502|AUGUSTUS-3.0.2_32505|GLEAN_02694|PDF receptor-like Protein
646	LOC663563	3.42658	2.15946e-07	TcasGA2_TC008323	uncharacterized LOC663563	; uncharacterized protein LOC663563|AUGUSTUS-3.0.2_32883|GLEAN_08323
647	LOC107398009	3.42311	2.79231e-09	TcasGA2_TC014556	hypothetical protein	; uncharacterized protein LOC107398009|AUGUSTUS-3.0.2_14556
648	LOC661037	3.41756	0.00965833	TcasGA2_TC001334	INO80 complex subunit C	; INO80 complex subunit C|GLEAN_01334|INO80 complex subunit C-like Protein
649	LOC103314877	3.4175	0.000235566		acidic repeat-containing protein	; acidic repeat-containing protein|AUGUSTUS-3.0.2_12902|GLEAN_12902
650	LOC659222	3.4169	0.00159979	TcasGA2_TC004424	protein crumbs	; protein crumbs|AUGUSTUS-3.0.2_04424|GLEAN_04424|Protein crumbs-like Protein
651	LOC661864	3.416	1.36684e-10	TcasGA2_TC010778	uncharacterized LOC661864	; uncharacterized protein LOC661864|AUGUSTUS-3.0.2_10778|GLEAN_10778
652	LOC662647	3.4125	0.0158861	TcasGA2_TC009576	zinc finger FYVE domain-containing protein 26 homolog	; zinc finger FYVE domain-containing protein 26 homolog|zinc finger FYVE domain-containing protein 26|GLEAN_09576|GLEAN_09577
653	LOC103313117	3.40792	0.0328994	TcasGA2_TC006841	zinc finger protein 470-like	; zinc finger protein 470-like|AUGUSTUS-3.0.2_06841|Zinc finger protein 98-like Protein
654	LOC660401	3.40589	0.00208303	TcasGA2_TC001126	tyrosine-protein phosphatase non-receptor type 13	; tyrosine-protein phosphatase non-receptor type 13|uncharacterized protein LOC660401|AUGUSTUS-3.0.2_01126|AUGUSTUS-3.0.2_01128|GLEAN_01126|GLEAN_01128
655	LOC661290	3.40251	0.0142008	TcasGA2_TC000041	leukocyte receptor cluster member 8 homolog	; leukocyte receptor cluster member 8 homolog|AUGUSTUS-3.0.2_00041|GLEAN_00041|Leukocyte receptor cluster member 8 homolog-like Protein
656	LOC662906	3.40228	0.0183311	TcasGA2_TC014687	esterase FE4	; esterase FE4|GLEAN_14687
657	LOC103314851	3.3989	1.15003e-06	TcasGA2_TC015899, slalom, sll	adenosine 3'-phospho 5'-phosphosulfate transporter 1	; adenosine 3'-phospho 5'-phosphosulfate transporter 1|GLEAN_15899
658	LOC103313364	3.3964	0.00977172	TcasGA2_TC016044	TLR4 interactor with leucine rich repeats	; TLR4 interactor with leucine rich repeats|AUGUSTUS-3.0.2_16044|Chaoptin-like Protein|GLEAN_16044
659	Th	3.39429	2.56239e-13	TcasGA2_TC002496	tyrosine hydroxylase	; tyrosine hydroxylase|AUGUSTUS-3.0.2_02496|GLEAN_02496|Tyrosine 3-monooxygenase-like Protein|pterin-dependent monooxygenase
660	LOC656414	3.39173	0.00710918	TcasGA2_TC003370	serine/threonine-protein kinase VRK1	; serine/threonine-protein kinase VRK1|AUGUSTUS-3.0.2_03370|GLEAN_03370
661	LOC664291	3.39062	0.00277451	TcasGA2_TC001084	protein spartin	; protein spartin|AUGUSTUS-3.0.2_01084|GLEAN_01084|Protein spartin-like Protein
662	LOC661365	3.3903	6.49279e-05	TcasGA2_TC003645	mitogen-activated protein kinase kinase kinase 13	; mitogen-activated protein kinase kinase kinase 13|AUGUSTUS-3.0.2_03645|GLEAN_03645|Mitogen-activated protein kinase kinase kinase 12-like Protein
663	LOC657770	3.38716	5.72027e-07		E3 ubiquitin-protein ligase RNF13	; E3 ubiquitin-protein ligase RNF13|AUGUSTUS-3.0.2_02100|E3 ubiquitin-protein ligase RNF13-like Protein|GLEAN_02100
664	LOC107398213	3.38652	0.00124782		transient receptor potential cation channel protein painless-like	; transient receptor potential cation channel protein painless-like|uncharacterized protein LOC107398213
665	LOC661873	3.38349	2.52096e-07	TcasGA2_TC001263	glycerophosphodiester phosphodiesterase 1	; glycerophosphodiester phosphodiesterase 1|AUGUSTUS-3.0.2_01263|GLEAN_01263|Glycerophosphodiester phosphodiesterase 1-like Protein
666	LOC662826	3.38043	1.38143e-05	TcasGA2_TC030547	protein SYS1 homolog	; protein SYS1 homolog|AUGUSTUS-3.0.2_30547|NONGLEAN-OG22125|Protein SYS1 homolog-like Protein
667	LOC658546	3.37904	1.01755e-05		F-box/LRR-repeat protein 7	; F-box/LRR-repeat protein 7|AUGUSTUS-3.0.2_02335|F-box/LRR-repeat protein 7-like Protein|GLEAN_02335
668	LOC657391	3.37838	0.000261285	TcasGA2_TC011290	E3 ubiquitin-protein ligase listerin	; E3 ubiquitin-protein ligase listerin|AUGUSTUS-3.0.2_11290|E3 ubiquitin-protein ligase listerin-like Protein|GLEAN_11290
669	LOC663299	3.37824	0.00851803	TcasGA2_TC006613	signal recognition particle subunit SRP68	; signal recognition particle subunit SRP68|similar to Probable signal recognition particle 68 kDa protein (SRP68)|GLEAN_06613
670	LOC103314709	3.37509	0.0140353	TcasGA2_TC004987	diuretic hormone class 2	; diuretic hormone class 2|uncharacterized protein LOC103314709|AUGUSTUS-3.0.2_04987|GLEAN_04987|diuretic hormone 31 like protein
671	LOC661127	3.37489	8.296e-05		uncharacterized LOC661127	; uncharacterized protein LOC661127|AUGUSTUS-3.0.2_12892|GLEAN_12892|GLEAN_12893
672	LOC103314719	3.37472	0.0264642	TcasGA2_TC010961	TATA box-binding protein-associated factor RNA polymerase I subunit B	; TATA box-binding protein-associated factor RNA polymerase I subunit B|AUGUSTUS-3.0.2_10961|GLEAN_10961
673	LOC658967	3.3743	1.57541e-10	TcasGA2_TC001762	Golgi phosphoprotein 3 homolog sauron	; Golgi phosphoprotein 3 homolog sauron|AUGUSTUS-3.0.2_01762|GLEAN_01762|Golgi phosphoprotein 3 homolog rotini|Golgi phosphoprotein 3 homolog rotini-like Protein
674	LOC660018	3.37413	0.000635958	TcasGA2_TC011551	serine/threonine-protein kinase Genghis Khan	; serine/threonine-protein kinase Genghis Khan|AUGUSTUS-3.0.2_11551|GLEAN_11551|Serine/threonine-protein kinase Genghis Khan-like Protein
675	LOC661730	3.37334	4.70135e-05	TcasGA2_TC008673	dipeptidyl peptidase 3	; dipeptidyl peptidase 3|AUGUSTUS-3.0.2_08673|Dipeptidyl peptidase 3-like Protein|GLEAN_08673
676	LOC657491	3.37245	0.0107431	TcasGA2_TC014097	alpha-tocopherol transfer protein-like	; alpha-tocopherol transfer protein-like|AUGUSTUS-3.0.2_14097|GLEAN_14097
677	LOC661093	3.37243	0.000518092	TcasGA2_TC000209	cytokine receptor-like factor 3	; cytokine receptor-like factor 3|AUGUSTUS-3.0.2_00209|GLEAN_00209
678	LOC661669	3.37113	7.04471e-06	TcasGA2_TC001001	microtubule-associated protein futsch	; microtubule-associated protein futsch|AUGUSTUS-3.0.2_01001|GLEAN_01001
679	LOC103312687	3.36967	0.000473403	TcasGA2_TC007340	uncharacterized LOC103312687	; uncharacterized protein LOC103312687|AUGUSTUS-3.0.2_07340|GLEAN_07340
680	LOC654954	3.36952	0.0399691	TcasGA2_TC010657	disintegrin and metalloproteinase domain-containing protein 12	; disintegrin and metalloproteinase domain-containing protein 12|AUGUSTUS-3.0.2_10657|Disintegrin and metalloproteinase domain-containing protein 12-like Protein|GLEAN_10657
681	LOC655453	3.36759	1.02557e-09	TcasGA2_TC008608	cartilage oligomeric matrix protein	; cartilage oligomeric matrix protein|AUGUSTUS-3.0.2_33882|AUGUSTUS-3.0.2_33883|GLEAN_08608|Thrombospondin-3-like Protein|Thrombospondin-4-B-like Protein
682	LOC103314635	3.36224	0.0183837	TcasGA2_TC010957	uncharacterized LOC103314635	; uncharacterized protein LOC103314635|AUGUSTUS-3.0.2_10957|GLEAN_10957
683	LOC103312405	3.35896	0.003725	TcasGA2_TC034606	ribonuclease P protein subunit p25-like protein	; ribonuclease P protein subunit p25-like protein|AUGUSTUS-3.0.2_34606
684	LOC659550	3.35377	0.00156306	TcasGA2_TC011518	39S ribosomal protein L4, mitochondrial	; 39S ribosomal protein L4, mitochondrial|39S ribosomal protein L4, mitochondrial-like Protein|AUGUSTUS-3.0.2_11518|GLEAN_11518
685	LOC663321	3.34862	1.71944e-07	TcasGA2_TC012717	titin	; titin|AUGUSTUS-3.0.2_12717|GLEAN_12717
686	LOC100141555	3.33908	0.000438114	TcasGA2_TC001115	regulator of nonsense transcripts 1	; regulator of nonsense transcripts 1|AUGUSTUS-3.0.2_01115|GLEAN_01115
687	LOC659403	3.3292	1.22698e-10	TcasGA2_TC030639	monocyte to macrophage differentiation factor	; monocyte to macrophage differentiation factor 2|monocyte to macrophage differentiation factor|AUGUSTUS-3.0.2_30639|GLEAN_05940-OG17449|Monocyte to macrophage differentiation factor 2-like Protein
688	LOC657810	3.32896	0.000895933	TcasGA2_TC015605	serine/threonine-protein kinase TAO1	; serine/threonine-protein kinase TAO1|AUGUSTUS-3.0.2_15605|AUGUSTUS-3.0.2_15606|GLEAN_15605|GLEAN_15606|Serine/threonine-protein kinase TAO1-like Protein|Serine/threonine-protein kinase hippo-like Protein
689	LOC103312788	3.3261	0.0434717	TcasGA2_TC008233	hypothetical protein	; uncharacterized protein LOC103312788|AUGUSTUS-3.0.2_08233|GLEAN_08233
690	LOC662061	3.32572	0.00192696	TcasGA2_TC006364	mutS protein homolog 4	; mutS protein homolog 4|AUGUSTUS-3.0.2_06364|GLEAN_06364
691	LOC658209	3.32046	2.45292e-06	TcasGA2_TC013034	serine/threonine-protein phosphatase 2A regulatory subunit B'' subunit beta	; serine/threonine-protein phosphatase 2A regulatory subunit B'' subunit beta|GLEAN_13034
692	LOC100142117	3.31549	0.0257546	TcasGA2_TC007661, Mip, PTSP	allatostatin type b	; allatostatin type b|AUGUSTUS-3.0.2_07661|GLEAN_07661|myoinhibiting peptide
693	LOC659697	3.31428	0.00123713	TcasGA2_TC004422	solute carrier family 26 member 10	; solute carrier family 26 member 10|AUGUSTUS-3.0.2_04422|GLEAN_04422|Prestin-like Protein
694	LOC107398960	3.31411	6.06534e-06		uncharacterized LOC107398960	; uncharacterized protein LOC107398960
695	LOC656008	3.30848	0.00441113	TcasGA2_TC002407	ER membrane protein complex subunit 1	; ER membrane protein complex subunit 1|AUGUSTUS-3.0.2_02407|ER membrane protein complex subunit 1-like Protein|GLEAN_02407
696	LOC660220	3.30826	0.0108048	TcasGA2_TC000773	uncharacterized LOC660220	; uncharacterized protein LOC660220|AUGUSTUS-3.0.2_00773|GLEAN_00773
697	LOC661848	3.30187	0.0448841	TcasGA2_TC008938	serine/threonine-protein kinase MARK2	; serine/threonine-protein kinase KIN2|serine/threonine-protein kinase MARK2|AUGUSTUS-3.0.2_33742|GLEAN_08938|GLEAN_08946|GLEAN_08947|Hormonally up-regulated neu tumor-associated kinase-like Protein
698	LOC660581	3.30083	0.00846128	TcasGA2_TC011240	protein-associating with the carboxyl-terminal domain of ezrin	; protein-associating with the carboxyl-terminal domain of ezrin|AUGUSTUS-3.0.2_11240|GLEAN_11240|Protein-associating with the carboxyl-terminal domain of ezrin-like Protein
699	LOC100141541	3.3006	0.00020328	TcasGA2_TC007258	pupal cuticle protein 36	; merozoite surface antigen 2|probable H/ACA ribonucleoprotein complex subunit 1|pupal cuticle protein 36|AUGUSTUS-3.0.2_07258|GLEAN_07258
700	LOC659008	3.29868	1.34069e-10	TcasGA2_TC032992	protein takeout-like	; protein takeout-like|AUGUSTUS-3.0.2_32992|Protein takeout-like Protein
701	LOC659221	3.29169	0.0265093	TcasGA2_TC004604	ribonuclease H1	; ribonuclease H1|AUGUSTUS-3.0.2_04604|GLEAN_04604|Ribonuclease H1-like Protein
702	LOC657307	3.2901	0.000150752		cellular tumor antigen p53	; cellular tumor antigen p53|AUGUSTUS-3.0.2_11560|GLEAN_11560|Tumor protein 63-like Protein
703	LOC103312579	3.28718	0.00916511		uncharacterized LOC103312579
704	LOC655653	3.28686	2.89733e-11	TcasGA2_TC004690	congested-like trachea protein	; congested-like trachea protein|AUGUSTUS-3.0.2_04690|GLEAN_04690
705	LOC656358	3.28592	0.0235859	TcasGA2_TC015755	lipoma-preferred partner homolog	; lipoma-preferred partner homolog|AUGUSTUS-3.0.2_15755|GLEAN_15755|Lipoma-preferred partner homolog-like Protein
706	LOC660021	3.28427	0.00134526		enhancer of mRNA-decapping protein 4	; enhancer of mRNA-decapping protein 4|AUGUSTUS-3.0.2_12909|GLEAN_12909
707	LOC103313904	3.28391	3.53422e-09	TcasGA2_TC034013	insulin receptor substrate 1	; insulin receptor substrate 1|insulin receptor substrate 1-B|AUGUSTUS-3.0.2_34013
708	LOC659897	3.28076	0.00344204	TcasGA2_TC004718	ELAV-like protein 4	; ELAV-like protein 3|ELAV-like protein 4|AUGUSTUS-3.0.2_34524|GLEAN_04718|Protein elav-like protein
709	LOC107399261	3.28066	0.0316013		synaptic vesicle glycoprotein 2C-like	; synaptic vesicle glycoprotein 2C-like
710	LOC658492	3.2748	0.00322554		eukaryotic translation initiation factor 6-like	; eukaryotic translation initiation factor 6-like
711	LOC663578	3.27247	0.00360512	TcasGA2_TC003307	cytosolic Fe-S cluster assembly factor NUBP1 homolog	; cytosolic Fe-S cluster assembly factor NUBP1 homolog|AUGUSTUS-3.0.2_03307|Cytosolic Fe-S cluster assembly factor NUBP1 homolog-like Protein|GLEAN_03307
712	LOC661997	3.27061	2.42441e-05	TcasGA2_TC011223	peroxisomal membrane protein 11C	; peroxisomal membrane protein 11C|AUGUSTUS-3.0.2_11223|GLEAN_11223|Peroxisomal membrane protein 11C-like Protein
713	LOC103314076	3.268	0.0127008	TcasGA2_TC005500	carboxypeptidase M	; carboxypeptidase M|AUGUSTUS-3.0.2_05500|GLEAN_05500|carboxypeptidase A
714	LOC656749	3.26769	1.76076e-07	TcasGA2_TC002673	peripheral plasma membrane protein CASK	; peripheral plasma membrane protein CASK|AUGUSTUS-3.0.2_02673|GLEAN_02673|Peripheral plasma membrane protein CASK-like Protein
715	LOC658751	3.26596	0.00106996	TcasGA2_TC012832	alpha-endosulfine	; alpha-endosulfine|AUGUSTUS-3.0.2_12832|Alpha-endosulfine-like Protein|GLEAN_12832
716	LOC103314838	3.26453	0.0445802		uncharacterized LOC103314838	; uncharacterized protein LOC103314838|AUGUSTUS-3.0.2_02238|GLEAN_02238
717	LOC656362	3.25875	0.0226339	TcasGA2_TC031181	protein bcn92	; protein bcn92|AUGUSTUS-3.0.2_31181|Protein bcn92-like Protein
718	LOC661831	3.25513	0.000225196	TcasGA2_TC001259, GLEAN_01262	aminopeptidase N-like protein	; aminopeptidase N-like protein|AUGUSTUS-3.0.2_01259|AUGUSTUS-3.0.2_01260|AUGUSTUS-3.0.2_01261|AUGUSTUS-3.0.2_01262|GLEAN_01259|GLEAN_01260|GLEAN_01261
719	LOC655894	3.25448	0.0132274		late secretory pathway protein AVL9 homolog	; late secretory pathway protein AVL9 homolog|AUGUSTUS-3.0.2_31766|Serine/threonine-protein kinase tousled-like 2
720	LOC657368	3.25155	0.0143913		alkaline phosphatase, tissue-nonspecific isozyme	; alkaline phosphatase, tissue-nonspecific isozyme
721	LOC663383	3.2512	0.000309705	TcasGA2_TC013377	exostosin-3	; exostosin-3|GLEAN_13377
722	LOC658784	3.25016	1.83899e-07	TcasGA2_TC002504	protein enabled	; protein enabled|AUGUSTUS-3.0.2_02504|GLEAN_02504|Protein enabled-like Protein
723	LOC103313267	3.24899	0.000956817	TcasGA2_TC013134	larval cuticle protein LCP-30	; larval cuticle protein LCP-30|GLEAN_13134
724	LOC660249	3.24096	0.00179739	TcasGA2_TC005853	protein ABHD13	; protein ABHD13|AUGUSTUS-3.0.2_05853|Alpha/beta hydrolase domain-containing protein 13-like Protein|GLEAN_05853|alpha/beta hydrolase domain-containing protein 13
725	LOC659280	3.23918	0.00740292	TcasGA2_TC031360	uncharacterized LOC659280	; uncharacterized protein LOC659280|AUGUSTUS-3.0.2_31360|AUGUSTUS-3.0.2_31709|GLEAN_01954
726	LOC661827	3.23483	4.98434e-06	TcasGA2_TC011259	uncharacterized LOC661827	; uncharacterized protein LOC661827|AUGUSTUS-3.0.2_11259|AUGUSTUS-3.0.2_11260|GLEAN_11259|GLEAN_11260
727	LOC660037	3.23482	0.000575447	TcasGA2_TC003985, DER, Egfr, Ellipse, top, torpedo	epidermal growth factor receptor	; epidermal growth factor receptor|AUGUSTUS-3.0.2_03986|AUGUSTUS-3.0.2_32673|GLEAN_03985|GLEAN_03986
728	LOC659252	3.22545	6.64008e-10	TcasGA2_TC014879	calpain-A	; calpain-A|AUGUSTUS-3.0.2_14879|Calpain-A-like Protein|GLEAN_14879
729	LOC103315256	3.22534	0.000469994	TcasGA2_TC000327	hypothetical protein	; uncharacterized protein LOC103315256|GLEAN_00327
730	LOC100142591	3.21956	8.95964e-05	TcasGA2_TC004667	protein phosphatase 1 regulatory subunit 37	; protein phosphatase 1 regulatory subunit 37|AUGUSTUS-3.0.2_04667|GLEAN_04667|Protein phosphatase 1 regulatory subunit 37-like Protein
731	LOC659093	3.21875	0.0445677	TcasGA2_TC014499	endocuticle structural glycoprotein SgAbd-5	; endocuticle structural glycoprotein SgAbd-5|GLEAN_14499
732	LOC100142092	3.21786	1.20194e-07	TcasGA2_TC001202	protein SMG5	; protein SMG5|AUGUSTUS-3.0.2_01202|GLEAN_01202
733	Tsl	3.21588	0.00114812	TcasGA2_TC008090	torso-like protein	; torso-like protein|AUGUSTUS-3.0.2_08090|GLEAN_08090
734	LOC658199	3.21544	0	TcasGA2_TC008407	protein mesh	; protein mesh|AUGUSTUS-3.0.2_08407|GLEAN_08407|Protein mesh-like Protein
735	LOC660261	3.21516	4.30074e-09	TcasGA2_TC001775	nuclear factor 1 C-type	; nuclear factor 1 A-type|nuclear factor 1 B-type|nuclear factor 1 C-type|AUGUSTUS-3.0.2_01775|GLEAN_01775
736	LOC662562	3.21386	5.47286e-06	TcasGA2_TC012164, GLEAN_12164	LMBR1 domain-containing protein 2 homolog	; LMBR1 domain-containing protein 2 homolog|AUGUSTUS-3.0.2_12164|LMBR1 domain-containing protein 2 homolog-like Protein
737	LOC657915	3.21258	0.0158081	TcasGA2_TC001674	SH3 domain-binding protein 5 homolog	; SH3 domain-binding protein 5 homolog|AUGUSTUS-3.0.2_01674|GLEAN_01674|SH3 domain-binding protein 5 homolog-like Protein
738	LOC107398485	3.21207	0.00391322		sodium-independent sulfate anion transporter-like	; sodium-independent sulfate anion transporter-like
739	LOC660737	3.21167	0.0309155	TcasGA2_TC031290	uncharacterized LOC660737	; uncharacterized protein LOC660737|AUGUSTUS-3.0.2_31290
740	LOC655283	3.21153	0.00938589	TcasGA2_TC015111	putative fatty acyl-CoA reductase CG5065	; putative fatty acyl-CoA reductase CG5065|AUGUSTUS-3.0.2_15111|GLEAN_15111|Putative fatty acyl-CoA reductase CG5065-like Protein
741	LOC658314	3.21025	0.0086264	TcasGA2_TC000032	cell division cycle protein 27 homolog	; cell division cycle protein 27 homolog|AUGUSTUS-3.0.2_00032|Cell division cycle protein 27 homolog-like Protein|GLEAN_00032
742	LOC663462	3.20394	0.00355568	TcasGA2_TC012726	PR domain zinc finger protein 10	; PR domain zinc finger protein 10|AUGUSTUS-3.0.2_12726|GLEAN_12726|PR domain zinc finger protein 10-like Protein
743	LOC107397693	3.20261	9.11761e-05		golgin IMH1	; golgin IMH1
744	LOC656058	3.20218	0.00391208	TcasGA2_TC001561	mitochondrial inner membrane protein COX18	; mitochondrial inner membrane protein COX18|AUGUSTUS-3.0.2_01561|GLEAN_01561|Mitochondrial inner membrane protein COX18-like Protein
745	LOC663647	3.19951	1.24651e-05	TcasGA2_TC000533	pyrroline-5-carboxylate reductase 3	; pyrroline-5-carboxylate reductase 3|AUGUSTUS-3.0.2_00533|GLEAN_00533|Pyrroline-5-carboxylate reductase 3-like Protein
746	LOC662888	3.19892	0.0261029	TcasGA2_TC006604	vacuolar protein sorting-associated protein 18 homolog	; vacuolar protein sorting-associated protein 18 homolog|AUGUSTUS-3.0.2_06604|GLEAN_06604|Vacuolar protein sorting-associated protein 18 homolog-like Protein
747	LOC660345	3.19827	0.000937933	TcasGA2_TC003633, mirr, mirror	homeobox protein caupolican	; homeobox protein caupolican|AUGUSTUS-3.0.2_32451|GLEAN_03633|GLEAN_03634|Homeobox protein araucan-like Protein
748	LOC656299	3.19547	0.0180024	TcasGA2_TC001921	lethal(3)malignant brain tumor-like protein 4	; lethal(3)malignant brain tumor-like protein 4|AUGUSTUS-3.0.2_01922|GLEAN_01921|GLEAN_01922|Lethal(3)malignant brain tumor-like protein 3
749	LOC658885	3.19441	0.00459331	TcasGA2_TC009607	pre-mRNA-processing factor 39	; pre-mRNA-processing factor 39|AUGUSTUS-3.0.2_09607|GLEAN_09607|Pre-mRNA-processing factor 39-like Protein
750	LOC662729	3.19183	9.54792e-15	TcasGA2_TC002962	titin	; titin|AUGUSTUS-3.0.2_32392|GLEAN_02962
751	LOC100142175	3.18877	5.78798e-05	TcasGA2_TC011427, NimA, NimB	multiple epidermal growth factor-like domains protein 11	; multiple epidermal growth factor-like domains protein 11|AUGUSTUS-3.0.2_11427|AUGUSTUS-3.0.2_11428|GLEAN_11427|GLEAN_11428|nimrod A|nimrod B
752	LOC103313905	3.184	0.00306791	TcasGA2_TC009222	zinc finger protein 883	; zinc finger protein 883|AUGUSTUS-3.0.2_09222|GLEAN_09222|Zinc finger protein 184-like Protein
753	LOC107397585	3.18278	0.0229285	TcasGA2_TC004688	uncharacterized LOC107397585	; uncharacterized protein LOC107397585|AUGUSTUS-3.0.2_04688
754	LOC655863	3.18153	2.47325e-06	TcasGA2_TC015175	transport and Golgi organization protein 2	; transport and Golgi organization protein 2|AUGUSTUS-3.0.2_15175|GLEAN_15175|Transport and Golgi organization protein 2-like Protein
755	LOC100124592	3.18043	2.76543e-05	TcasGA2_TC034596	aspartate 1-decarboxylase	; aspartate 1-decarboxylase|AUGUSTUS-3.0.2_34596|Glutamate decarboxylase-like protein
756	LOC655908	3.18028	3.38964e-07	TcasGA2_TC016270	kelch-like ECH-associated protein 1	; kelch-like ECH-associated protein 1|AUGUSTUS-3.0.2_16270|GLEAN_16270|Kelch-like protein diablo
757	LOC662085	3.17426	0.00944376	TcasGA2_TC015126	protein abrupt	; protein abrupt|AUGUSTUS-3.0.2_15126|GLEAN_15126
758	LOC655812	3.17184	0.0228902	TcasGA2_TC010650	cytoplasmic tRNA 2-thiolation protein 1	; cytoplasmic tRNA 2-thiolation protein 1|AUGUSTUS-3.0.2_10650|Cytoplasmic tRNA 2-thiolation protein 1-like Protein|GLEAN_10650
759	LOC655330	3.17011	0.000993838	TcasGA2_TC004855	LETM1 and EF-hand domain-containing protein anon-60Da, mitochondrial	; LETM1 and EF-hand domain-containing protein anon-60Da, mitochondrial|AUGUSTUS-3.0.2_04855|GLEAN_04855|LETM1 and EF-hand domain-containing protein anon-60Da, mitochondrial-like Protein
760	LOC662173	3.16619	0.000137473	TcasGA2_TC012873	brahma-associated protein of 60 kDa	; brahma-associated protein of 60 kDa|AUGUSTUS-3.0.2_12873|Brahma-associated protein of 60 kDa-like Protein|GLEAN_12873
761	LOC103314512	3.16588	0.0281073	TcasGA2_TC001724	protein pigeon	; protein pigeon|AUGUSTUS-3.0.2_01724|GLEAN_01724|Protein pigeon-like Protein
762	LOC103313199	3.16548	0.0217608	TcasGA2_TC013041	hypothetical protein	; uncharacterized protein LOC103313199|GLEAN_13041
763	LOC100142212	3.16458	0.00140309	TcasGA2_TC015421	uncharacterized LOC100142212	; uncharacterized protein LOC100142212|AUGUSTUS-3.0.2_15421|GLEAN_15421
764	LOC656750	3.16302	0.006189	TcasGA2_TC002596	exonuclease mut-7 homolog	; exonuclease mut-7 homolog|AUGUSTUS-3.0.2_32570|Exonuclease mut-7 homolog-like Protein|GLEAN_02596
765	Csp5	3.15907	0.00573052	TcasGA2_TC014532, CSP14, TcCSP7F, TcasCSP5	chemosensory protein 5	; chemosensory protein 5|GLEAN_14532|chemosensory protein 14
766	LOC100141596	3.15771	0.00435491	TcasGA2_TC012550	glycoprotein-N-acetylgalactosamine 3-beta-galactosyltransferase 1	; glycoprotein-N-acetylgalactosamine 3-beta-galactosyltransferase 1|AUGUSTUS-3.0.2_12550|GLEAN_12550|Glycoprotein-N-acetylgalactosamine 3-beta-galactosyltransferase 1-B-like Protein|glycoprotein-N-acetylgalactosamine 3-beta-galactosyltransferase 1-B
767	LOC664035	3.15738	0.0293529	TcasGA2_TC013083	splicing factor 45	; splicing factor 45|GLEAN_13083
768	LOC656109	3.15477	0.00343644	TcasGA2_TC015753	putative fatty acyl-CoA reductase CG5065	; fatty acyl-CoA reductase 1|putative fatty acyl-CoA reductase CG5065|AUGUSTUS-3.0.2_15753|GLEAN_15753|Putative fatty acyl-CoA reductase CG5065-like Protein
769	LOC107398701	3.15333	0.0103346		protoheme IX farnesyltransferase, mitochondrial	; protoheme IX farnesyltransferase, mitochondrial
770	LOC659290	3.15085	0.00348793	TcasGA2_TC006232	cytochrome b5-related protein	; cytochrome b5-related protein|AUGUSTUS-3.0.2_06232|Cytochrome b5-related protein-like Protein|GLEAN_06232
771	LOC656094	3.14978	0.000814111	TcasGA2_TC007014, Tc-vnd, Vnd	ventral nervous system defective	; homeobox protein Nkx-2.2|homeobox protein vnd|AUGUSTUS-3.0.2_07014|GLEAN_07014|Homeobox protein vnd-like Protein|ventral nerve cord defective protein
772	LOC660716	3.14949	5.33038e-05	TcasGA2_TC013292, PSME4	proteasome activator complex subunit 4	; proteasome activator complex subunit 4|AUGUSTUS-3.0.2_13292|GLEAN_13292|Proteasome activator complex subunit 4-like Protein|proteasome (prosome, macropain) activator subunit 4
773	LOC662348	3.14622	0.0309251	TcasGA2_TC033977	protein msta, isoform B	; protein msta, isoform B|AUGUSTUS-3.0.2_33977|Protein msta, isoform A-like Protein
774	Dpp	3.14216	0.0030701	TcasGA2_TC008466	decapentaplegic	; protein decapentaplegic|AUGUSTUS-3.0.2_08466|GLEAN_08466
775	LOC661705	3.14059	1.9984e-15	TcasGA2_TC009072	phosphoenolpyruvate carboxykinase [GTP]	; phosphoenolpyruvate carboxykinase [GTP]|AUGUSTUS-3.0.2_09072|GLEAN_09072|Phosphoenolpyruvate carboxykinase [GTP]-like Protein
776	LOC659682	3.14026	0.000970909	TcasGA2_TC015893	G protein pathway suppressor 2	; G protein pathway suppressor 2|AUGUSTUS-3.0.2_15893|GLEAN_15893
777	LOC662837	3.14016	2.57798e-11	TcasGA2_TC010766	dual specificity protein phosphatase 10	; dual specificity protein phosphatase 10|AUGUSTUS-3.0.2_10766|Dual specificity protein phosphatase Mpk3-like Protein|GLEAN_10766
778	LOC655729	3.13754	0.000201214		oxysterol-binding protein-related protein 8	; oxysterol-binding protein-related protein 8|AUGUSTUS-3.0.2_16041|GLEAN_16041|Oxysterol-binding protein-related protein 8-like Protein
779	LOC656449	3.13376	0.00516747	TcasGA2_TC006052	ceramide synthase 6	; ceramide synthase 6|AUGUSTUS-3.0.2_06052|Ceramide synthase 6-like Protein|GLEAN_06052
780	LOC662557	3.13248	0.0014205	TcasGA2_TC005988	UPF0454 protein C12orf49 homolog	; UPF0454 protein C12orf49 homolog|AUGUSTUS-3.0.2_05988|GLEAN_05988|UPF0454 protein C12orf49 homolog-like Protein
781	LOC103313099	3.12851	0.00195457		solute carrier family 25 member 51	; solute carrier family 25 member 51
782	LOC658743	3.1209	0.035619	TcasGA2_TC006213	mediator of RNA polymerase II transcription subunit 1	; mediator of RNA polymerase II transcription subunit 1|AUGUSTUS-3.0.2_06213|GLEAN_06213
783	LOC655348	3.11426	0.000394414	TcasGA2_TC002609	mitogen-activated protein kinase kinase kinase kinase 5	; mitogen-activated protein kinase kinase kinase kinase 3|mitogen-activated protein kinase kinase kinase kinase 5|AUGUSTUS-3.0.2_02609|GLEAN_02609|Mitogen-activated protein kinase kinase kinase kinase 3-like Protein
784	LOC664150	3.11007	0.0310927	TcasGA2_TC014743	phosphatidate cytidylyltransferase, photoreceptor-specific	; phosphatidate cytidylyltransferase, photoreceptor-specific|GLEAN_14743
785	LOC103314758	3.10673	0.0129518	TcasGA2_TC033495	zinc finger protein ZFP69	; uncharacterized protein LOC103314758|zinc finger protein ZFP69|AUGUSTUS-3.0.2_33495|AUGUSTUS-3.0.2_33496|AUGUSTUS-3.0.2_33497|GLEAN_05101|Zinc finger protein 554-like Protein
786	LOC663869	3.09949	0.0438956	TcasGA2_TC006410	longitudinals lacking protein, isoforms H/M/V	; longitudinals lacking protein, isoforms H/M/V|AUGUSTUS-3.0.2_06410|GLEAN_06410|Protein bric-a-brac 1-like Protein
787	LOC657348	3.0972	0.0137109	TcasGA2_TC009288	prostaglandin reductase 1	; prostaglandin reductase 1|GLEAN_09288
788	LOC657976	3.08781	0.00375829	TcasGA2_TC009708	cyclin-T	; cyclin-T|AUGUSTUS-3.0.2_31193|GLEAN_09708|GLEAN_09709
789	LOC659601	3.0861	1.56178e-10	TcasGA2_TC006748	integrin alpha-PS1	; integrin alpha-PS1|AUGUSTUS-3.0.2_34177|GLEAN_06748|GLEAN_06750|Integrin alpha-PS1-like Protein
790	LOC659082	3.08571	1.63113e-06	TcasGA2_TC002501	CCR4-NOT transcription complex subunit 3	; CCR4-NOT transcription complex subunit 3|AUGUSTUS-3.0.2_02501|CCR4-NOT transcription complex subunit 3-like Protein|GLEAN_02501
791	Vvl	3.08496	7.45688e-10	TcasGA2_TC014350	ventral vein lacking	; ventral vein lacking|GLEAN_14350|ventral veins lacking
792	LOC103312586	3.08136	0.000816006	TcasGA2_TC003588	hypothetical protein	; uncharacterized protein LOC103312586|AUGUSTUS-3.0.2_03588|GLEAN_03588
793	LOC658801	3.08116	4.31271e-06		inverted formin-2-like	; LOW QUALITY PROTEIN: inverted formin-2-like
794	LOC663599	3.08085	0.0234829	TcasGA2_TC007407	tetratricopeptide repeat protein 5	; tetratricopeptide repeat protein 5|AUGUSTUS-3.0.2_07407|GLEAN_07407|Tetratricopeptide repeat protein 5-like Protein
795	LOC660398	3.0778	0.0209063	TcasGA2_TC004782	uncharacterized LOC660398	; uncharacterized protein LOC660398|AUGUSTUS-3.0.2_04782|GLEAN_04782
796	LOC659083	3.07734	7.36742e-05	TcasGA2_TC003977	TBC1 domain family member 13	; TBC1 domain family member 13|AUGUSTUS-3.0.2_03977|GLEAN_03977|TBC1 domain family member 13-like Protein
797	LOC659831	3.07728	9.84741e-05		vacuolar protein sorting-associated protein 16 homolog	; vacuolar protein sorting-associated protein 16 homolog|AUGUSTUS-3.0.2_01384|GLEAN_01384|Vacuolar protein sorting-associated protein 16 homolog-like Protein
798	LOC661452	3.0748	0.00421468	TcasGA2_TC011125	arginine/serine-rich protein PNISR	; arginine/serine-rich protein PNISR|AUGUSTUS-3.0.2_11125|GLEAN_11125
799	LOC655136	3.06919	0.0223727	TcasGA2_TC014910	Hermansky-Pudlak syndrome 3 protein homolog	; Hermansky-Pudlak syndrome 3 protein homolog|AUGUSTUS-3.0.2_14910|GLEAN_14910
800	LOC663235	3.06832	0.0398232	TcasGA2_TC009160	hypothetical protein	; uncharacterized protein LOC663235|AUGUSTUS-3.0.2_09160|GLEAN_09160
801	LOC660148	3.06656	8.76247e-05		transforming growth factor-beta-induced protein ig-h3	; transforming growth factor-beta-induced protein ig-h3|AUGUSTUS-3.0.2_12903|GLEAN_12903|Periostin-like Protein
802	LOC660492	3.06555	0.0295713	TcasGA2_TC009262	protein HEXIM	; protein HEXIM|AUGUSTUS-3.0.2_09262|GLEAN_09262|Protein HEXIM-like Protein
803	Abd-B	3.06499	0.00271239	TcasGA2_TC000889	abdominal-B	; abdominal-B|AUGUSTUS-3.0.2_00889|GLEAN_00889
804	LOC662569	3.06295	0.000147241	TcasGA2_TC000401, FAT, cadherin	fat-like cadherin-related tumor suppressor homolog	; fat-like cadherin-related tumor suppressor homolog|AUGUSTUS-3.0.2_32189|AUGUSTUS-3.0.2_32190|GLEAN_00401
805	LOC655131	3.06208	0.000133469		putative phosphoenolpyruvate synthase	; putative phosphoenolpyruvate synthase
806	LOC656840	3.06176	0.000572725	TcasGA2_TC003830	pupal cuticle protein 20	; pupal cuticle protein 20|AUGUSTUS-3.0.2_03830|GLEAN_03830
807	LOC662602	3.0582	0.00106119	TcasGA2_TC032729	1-phosphatidylinositol 4,5-bisphosphate phosphodiesterase classes I and II	; 1-phosphatidylinositol 4,5-bisphosphate phosphodiesterase classes I and II|1-phosphatidylinositol 4,5-bisphosphate phosphodiesterase classes I and II-like Protein|AUGUSTUS-3.0.2_32729
808	LOC664270	3.05558	0.0459926	TcasGA2_TC007523	WD repeat-containing protein 19	; WD repeat-containing protein 19|AUGUSTUS-3.0.2_07523|GLEAN_07523|WD repeat-containing protein 19-like Protein
809	LOC655994	3.05305	0.0388786	TcasGA2_TC011070	kynurenine formamidase	; kynurenine formamidase|GLEAN_11070
810	LOC659521	3.05279	3.26099e-07	TcasGA2_TC014503	intersectin-1	; intersectin-1|GLEAN_14503
811	LOC664335	3.05187	0.0170292	TcasGA2_TC002894	probable serine hydrolase	; probable serine hydrolase|similar to CG7632-PA|GLEAN_02894|putative serine hydrolase-like Protein
812	LOC660417	3.05056	0.0179962	TcasGA2_TC014516, spn-E	spindle E	; probable ATP-dependent RNA helicase spindle-E|AUGUSTUS-3.0.2_14516|GLEAN_14516
813	LOC662496	3.04661	0.000135927	TcasGA2_TC010769	tetratricopeptide repeat protein 39B	; tetratricopeptide repeat protein 39B|AUGUSTUS-3.0.2_10769|GLEAN_10769|Tetratricopeptide repeat protein 39B-like Protein
814	LOC656296	3.04626	0.0490556	TcasGA2_TC001741	uncharacterized LOC656296	; uncharacterized protein LOC656296|AUGUSTUS-3.0.2_01741|DNA-binding protein SATB1|GLEAN_01741
815	LOC103314015	3.0444	0.000132406	TcasGA2_TC006565	hypothetical protein	; uncharacterized protein LOC103314015|AUGUSTUS-3.0.2_06565|GLEAN_06565
816	Vis	3.04382	5.89131e-06	TcasGA2_TC009623	vismay	; vismay|AUGUSTUS-3.0.2_09623|GLEAN_09623|Homeobox protein TGIF1-like Protein
817	Serpin5	3.0437	0.0280428	TcasGA2_TC030077	serpin peptidase inhibitor 5	; serpin peptidase inhibitor 5|93 kDa serpin|GLEAN_04161B
818	LOC103314893	3.0417	0.00557175	TcasGA2_TC004365	thyroid adenoma-associated protein homolog	; thyroid adenoma-associated protein homolog|AUGUSTUS-3.0.2_04365|GLEAN_04365
819	LOC662170	3.03939	0	TcasGA2_TC012170	clarin-3	; clarin-3|AUGUSTUS-3.0.2_12170|GLEAN_12170
820	LOC662957	3.03463	0.00125506	TcasGA2_TC007804	protein king tubby	; protein king tubby|AUGUSTUS-3.0.2_07804|GLEAN_07804|Protein king tubby-like Protein
821	LOC657776	3.03458	5.72463e-06	TcasGA2_TC005185	polyadenylate-binding protein 1	; polyadenylate-binding protein 1|AUGUSTUS-3.0.2_05185|GLEAN_05185|Polyadenylate-binding protein-like Protein
822	LOC100141972	3.03457	0.019373	TcasGA2_TC012040	uncharacterized LOC100141972	; uncharacterized protein LOC100141972|AUGUSTUS-3.0.2_12040|GLEAN_12040
823	LOC663614	3.02748	1.25789e-05	TcasGA2_TC007819	MAGUK p55 subfamily member 5-A	; MAGUK p55 subfamily member 5-A|AUGUSTUS-3.0.2_31096|GLEAN_07819|GLEAN_07820|MAGUK p55 subfamily member 5-like Protein
824	LOC103312348	3.02697	0.00124839	TcasGA2_TC002907	hypothetical protein	; uncharacterized protein LOC103312348|AUGUSTUS-3.0.2_02907|GLEAN_02907
825	LOC663543	3.02495	1.20355e-10	TcasGA2_TC002943	zinc transporter ZIP1	; zinc transporter ZIP1|AUGUSTUS-3.0.2_02943|GLEAN_02943|Zinc transporter ZIP1-like Protein
826	LOC103313422	3.02453	0.0157691	TcasGA2_TC015019	GDNF-inducible zinc finger protein 1	; GDNF-inducible zinc finger protein 1|AUGUSTUS-3.0.2_34741|GLEAN_15019
827	LOC662367	3.02082	0.0107229	TcasGA2_TC007794	serine/threonine-protein kinase 33	; serine/threonine-protein kinase 33|AUGUSTUS-3.0.2_07794|Calcium/calmodulin-dependent protein kinase type II alpha chain-like Protein|GLEAN_07794
828	LOC659804	3.01973	1.94955e-13	TcasGA2_TC005552	WW domain-binding protein 2	; WW domain-binding protein 2|AUGUSTUS-3.0.2_05552|GLEAN_05552|WW domain-binding protein 2-like Protein
829	LOC664240	3.01954	4.42903e-06	TcasGA2_TC008366	sphingomyelin phosphodiesterase	; sphingomyelin phosphodiesterase|GLEAN_08366
830	LOC662936	3.01907	2.06801e-06	TcasGA2_TC014414	ribonuclease P protein subunit p40-like	; ribonuclease P protein subunit p40-like|uncharacterized protein LOC662936|GLEAN_14414
831	LOC662167	3.01847	0.0110772	TcasGA2_TC006501	E3 ubiquitin-protein ligase RBBP6	; E3 ubiquitin-protein ligase RBBP6|AUGUSTUS-3.0.2_06501|E3 ubiquitin-protein ligase RBBP6-like Protein|GLEAN_06501
832	LOC662798	3.0136	0.00214075	TcasGA2_TC013485, Gr106	glucose transporter	; solute carrier family 2, facilitated glucose transporter member 1|GLEAN_13485|GLEAN_13486|gustatory receptor
833	LOC100271908	3.01207	0.039548	TcasGA2_TC010897, Vg	vestigial	; protein vestigial|AUGUSTUS-3.0.2_33006|GLEAN_10897
834	LOC662229	3.01199	3.36384e-11	TcasGA2_TC008668	protein 4.1 homolog	; protein 4.1 homolog|AUGUSTUS-3.0.2_08668|GLEAN_08668
835	LOC655443	3.01055	2.18095e-06	TcasGA2_TC014175	multiple coagulation factor deficiency protein 2	; multiple coagulation factor deficiency protein 2|AUGUSTUS-3.0.2_14175|GLEAN_14175|Multiple coagulation factor deficiency protein 2 homolog-like Protein
836	LOC655823	3.00931	0.00641789	TcasGA2_TC008728	ATP synthase subunit alpha, mitochondrial	; ATP synthase subunit alpha, mitochondrial|ATP synthase subunit alpha, mitochondrial-like Protein|AUGUSTUS-3.0.2_08728|GLEAN_08728
837	Cyp4q3	3.00756	4.65421e-05	TcasGA2_TC012499	cytochrome P450 monooxigenase CYP4Q3	; cytochrome P450 monooxigenase CYP4Q3|AUGUSTUS-3.0.2_12499|GLEAN_12499|cytochrome P450-like protein
838	LOC656703	3.00723	5.69963e-07	TcasGA2_TC012004	T-cell immunomodulatory protein	; T-cell immunomodulatory protein|GLEAN_12004
839	LOC107399226	3.00652	0.000391173	TcasGA2_TC032161	serine protease easter-like	; serine protease easter-like|AUGUSTUS-3.0.2_32161|Serine protease easter-like Protein
840	LOC662582	3.00518	0.0139271	TcasGA2_TC010163	multiple organellar RNA editing factor 1, mitochondrial	; multiple organellar RNA editing factor 1, mitochondrial|GLEAN_10163|vitelline membrane protein Vm26Ab
841	Pan	3.00286	2.81597e-12	TcasGA2_TC003720	pangolin	; pangolin|AUGUSTUS-3.0.2_32496|GLEAN_03720|GLEAN_03726|GLEAN_03727|GLEAN_03728|Protein pangolin, isoforms A/H/I/S-like Protein
842	LOC661377	3.00012	0.000620558	TcasGA2_TC015302	2-methoxy-6-polyprenyl-1,4-benzoquinol methylase, mitochondrial	; 2-methoxy-6-polyprenyl-1,4-benzoquinol methylase, mitochondrial|2-methoxy-6-polyprenyl-1,4-benzoquinol methylase, mitochondrial-like Protein|AUGUSTUS-3.0.2_15302|GLEAN_15302
843	LOC663363	2.9988	3.43714e-05	TcasGA2_TC007565	striatin-3	; striatin-3|AUGUSTUS-3.0.2_07565|GLEAN_07565|Striatin-3-like Protein
844	LOC664093	2.99428	0.0308461	TcasGA2_TC008121	protein lin-9 homolog	; protein lin-9 homolog|AUGUSTUS-3.0.2_08121|GLEAN_08121|Protein lin-9 homolog-like Protein
845	LOC660167	2.99313	0.00259689	TcasGA2_TC007772	serine/threonine-protein kinase RIO1	; serine/threonine-protein kinase RIO1|AUGUSTUS-3.0.2_07772|GLEAN_07772|Serine/threonine-protein kinase RIO1-like Protein
846	LOC663708	2.99261	0.0087742	TcasGA2_TC012628	actin-binding protein IPP	; actin-binding protein IPP|AUGUSTUS-3.0.2_12628|GLEAN_12628|Kelch-like protein diablo
847	LOC661577	2.9925	1.26541e-05	TcasGA2_TC011124, fwd	four wheel drive	; phosphatidylinositol 4-kinase beta|AUGUSTUS-3.0.2_11124|GLEAN_11124
848	LOC659871	2.99212	0.01047	TcasGA2_TC005799	F-box/LRR-repeat protein 4	; F-box/LRR-repeat protein 4|AUGUSTUS-3.0.2_34049|F-box/LRR-repeat protein 4-like Protein|GLEAN_05799
849	LOC658980	2.99107	0.00201376		DDB1- and CUL4-associated factor 6	; DDB1- and CUL4-associated factor 6|GLEAN_04403
850	LOC655617	2.99028	0.0286846	TcasGA2_TC006094	peregrin	; LOW QUALITY PROTEIN: peregrin|similar to AGAP007617-PA|AUGUSTUS-3.0.2_06094|GLEAN_06094|Peregrin-like Protein
851	LOC107397977	2.99013	0.0140179		GTP-binding protein 10 homolog	; GTP-binding protein 10 homolog
852	LOC662506	2.98828	5.72431e-13	TcasGA2_TC007922	acetylcholinesterase	; acetylcholinesterase|AUGUSTUS-3.0.2_07922|Esterase-6-like Protein|GLEAN_07922
853	LOC100141642	2.98556	0.0166257	TcasGA2_TC014796	amyloid beta A4 precursor protein-binding family B member 1-interacting protein	; amyloid beta A4 precursor protein-binding family B member 1-interacting protein|GLEAN_14796|GLEAN_14797
854	LOC661049	2.97695	0.0013885	TcasGA2_TC013413	beta-lactamase-like protein 2 homolog	; beta-lactamase-like protein 2 homolog|GLEAN_13413
855	LOC657183	2.97098	0.00156678	TcasGA2_TC013875	zinc finger MYND domain-containing protein 11	; zinc finger MYND domain-containing protein 11|AUGUSTUS-3.0.2_13875|GLEAN_13875|Zinc finger MYND domain-containing protein 11-like Protein
856	LOC660191	2.97044	0.0154485	TcasGA2_TC006485	protein msta, isoform A	; protein msta, isoform A|AUGUSTUS-3.0.2_06485|GLEAN_06485|Protein msta, isoform A-like Protein
857	LOC655683	2.96478	5.19426e-06	TcasGA2_TC013336	ultraviolet-B receptor UVR8	; ultraviolet-B receptor UVR8|GLEAN_13336|secretion-regulating guanine nucleotide exchange factor
858	LOC659395	2.96213	0.0020715	TcasGA2_TC009878	kxDL motif-containing protein CG10681	; kxDL motif-containing protein CG10681|AUGUSTUS-3.0.2_09878|GLEAN_09878|KxDL motif-containing protein CG10681-like Protein
859	LOC103314492	2.96011	0.0227287	TcasGA2_TC010361	THAP domain-containing protein 5-like	; THAP domain-containing protein 5-like|AUGUSTUS-3.0.2_10361
860	LOC663495	2.95869	1.29856e-05	TcasGA2_TC014435	alpha-methylacyl-CoA racemase	; alpha-methylacyl-CoA racemase|GLEAN_14435
861	LOC657418	2.95863	0.000393612	TcasGA2_TC015164	ankyrin repeat domain-containing protein 50	; ankyrin repeat domain-containing protein 50|AUGUSTUS-3.0.2_15164|Ankyrin repeat domain-containing protein 50-like Protein|GLEAN_15164
862	LOC655547	2.95845	7.06293e-06	TcasGA2_TC012067	cyclin-G-associated kinase	; cyclin-G-associated kinase|AUGUSTUS-3.0.2_12067|Cyclin-G-associated kinase-like Protein|GLEAN_12067
863	Cyp4g7	2.95526	0.00287906	TcasGA2_TC007061	cytochrome P450 monooxigenase CYP4G7	; cytochrome P450 monooxigenase CYP4G7|AUGUSTUS-3.0.2_07061|GLEAN_07061|cytochrome P450-like protein
864	LOC656115	2.95204	0.00951631	TcasGA2_TC006096	putative fatty acyl-CoA reductase CG5065	; putative fatty acyl-CoA reductase CG5065|AUGUSTUS-3.0.2_06096|GLEAN_06096|Putative fatty acyl-CoA reductase CG5065-like Protein
865	LOC103315034	2.95117	0.00226639		uncharacterized LOC103315034	; uncharacterized protein LOC103315034
866	LOC659349	2.94664	0.00609218	TcasGA2_TC004260	low-density lipoprotein receptor-related protein 2	; low-density lipoprotein receptor-related protein 2|AUGUSTUS-3.0.2_31922|GLEAN_04260|GLEAN_04414|Low-density lipoprotein receptor-related protein 2-like Protein
867	LOC100141933	2.94532	0.000535573	TcasGA2_TC030697	adenylate cyclase type 2	; adenylate cyclase type 2|AUGUSTUS-3.0.2_30697|Adenylate cyclase type 2-like Protein|GLEAN_02815-OG2548
868	LOC655325	2.94365	1.97427e-07	TcasGA2_TC013256	WD repeat-containing protein 37	; WD repeat-containing protein 37|AUGUSTUS-3.0.2_13256|GLEAN_13256|WD repeat-containing protein 37-like Protein
869	LOC657865	2.93533	0.00671549	TcasGA2_TC000971	probable E3 ubiquitin-protein ligase HERC1	; probable E3 ubiquitin-protein ligase HERC1|AUGUSTUS-3.0.2_00971|GLEAN_00971|putative E3 ubiquitin-protein ligase HERC1-like Protein
870	LOC100142472	2.93438	0.00969261	TcasGA2_TC016387	glucose-dependent insulinotropic receptor	; glucose-dependent insulinotropic receptor|AUGUSTUS-3.0.2_16387|GLEAN_16387|Glucose-dependent insulinotropic receptor-like Protein
871	LOC657614	2.93373	0.00276601	TcasGA2_TC034514	integrator complex subunit 12	; integrator complex subunit 12|AUGUSTUS-3.0.2_34514|GLEAN_01873|Integrator complex subunit 12-like protein
872	LOC100142184	2.93171	1.70242e-06		F-box/LRR-repeat protein 20	; F-box/LRR-repeat protein 20
873	LOC662535	2.92944	6.69969e-05	TcasGA2_TC001355	uncharacterized LOC662535	; similar to CG31195-PA|uncharacterized protein LOC662535|AUGUSTUS-3.0.2_01355|GLEAN_01355
874	LOC660415	2.92758	3.61267e-05	TcasGA2_TC014287	verprolin	; verprolin|GLEAN_14287
875	BBIP1	2.92744	3.42379e-05		BBSome-interacting protein 1-like	; BBSome-interacting protein 1-like|BBSome-interacting protein of 10 kDa-like
876	LOC659033	2.92737	4.21247e-11	TcasGA2_TC012268	leucine-rich repeat-containing protein 70	; leucine-rich repeat-containing protein 70|AUGUSTUS-3.0.2_32528|AUGUSTUS-3.0.2_32529|GLEAN_12268
877	LOC659556	2.92539	0.0209343	TcasGA2_TC011676	superoxide dismutase-like protein	; superoxide dismutase-like protein|AUGUSTUS-3.0.2_11676|Superoxide dismutase [Cu-Zn]-like Protein
878	LOC661204	2.92517	0.0145173	TcasGA2_TC007458	anaphase-promoting complex subunit 11	; anaphase-promoting complex subunit 11|protein FAM89B|uncharacterized protein LOC661204|AUGUSTUS-3.0.2_07458|GLEAN_07458
879	LOC663686	2.91778	0.00127715	TcasGA2_TC007676	uncharacterized LOC663686	; uncharacterized protein LOC663686|AUGUSTUS-3.0.2_07676|GLEAN_07676
880	LOC662411	2.91693	0.0391086	TcasGA2_TC015048	zinc finger protein 184	; zinc finger protein 184|AUGUSTUS-3.0.2_15048|GLEAN_15048|Zinc finger protein 98-like Protein
881	LOC103315111	2.91535	0.00117586	TcasGA2_TC001054, spz-like	protein spaetzle	; protein spaetzle|AUGUSTUS-3.0.2_01054|GLEAN_01054|spaetzle-like protein
882	LOC103313089	2.91371	0.0205661		COMM domain-containing protein 5	; COMM domain-containing protein 5|AUGUSTUS-3.0.2_04291|COMM domain-containing protein 5-like Protein|GLEAN_04291
883	LOC655315	2.91278	1.55267e-11		serine/threonine-protein kinase PAK 1	; serine/threonine-protein kinase PAK 1|AUGUSTUS-3.0.2_02075|GLEAN_02075|Serine/threonine-protein kinase PAK mbt-like Protein
884	LOC103314537	2.91189	0.0231328		probable cytochrome P450 28a5	; probable cytochrome P450 28a5
885	LOC654984	2.91136	0.00126987	TcasGA2_TC007101	protein goliath	; protein goliath|AUGUSTUS-3.0.2_07101|GLEAN_07101|Protein goliath-like Protein
886	LOC100142604	2.91128	0.000310185	TcasGA2_TC013033	transcription initiation factor TFIID subunit 6	; similar to transcription initiation factor TFIID subunit 6|transcription initiation factor TFIID subunit 6|GLEAN_13033
887	LOC656960	2.91026	8.71765e-06	TcasGA2_TC006458	roquin-1	; roquin-1|AUGUSTUS-3.0.2_34094|GLEAN_06458|GLEAN_06459|Roquin-1-like Protein
888	LOC103312328	2.9077	0.0495937	TcasGA2_TC003468	uncharacterized LOC103312328	; uncharacterized protein LOC103312328|AUGUSTUS-3.0.2_03468|GLEAN_03468
889	LOC660740	2.90722	0.00398171	TcasGA2_TC012390, H129	atrial natriuretic peptide-converting enzyme	; atrial natriuretic peptide-converting enzyme|AUGUSTUS-3.0.2_12390|GLEAN_12390|serine protease H129
890	LOC659918	2.90613	0.00192354	TcasGA2_TC013689, Ush, u-shaped	zinc finger protein u-shaped	; zinc finger protein ush|AUGUSTUS-3.0.2_13689|AUGUSTUS-3.0.2_31141|GLEAN_13689
891	LOC103312143	2.90597	0.0309061	TcasGA2_TC033988	uncharacterized LOC103312143	; uncharacterized protein LOC103312143|AUGUSTUS-3.0.2_33988
892	LOC103313558	2.90596	0.00405173	TcasGA2_TC009265	non-canonical poly(A) RNA polymerase PAPD5	; non-canonical poly(A) RNA polymerase PAPD5|AUGUSTUS-3.0.2_09265|GLEAN_09265|Non-canonical poly(A) RNA polymerase PAPD5-like Protein
893	LOC657670	2.90514	4.26291e-06	TcasGA2_TC012361	patched domain-containing protein 3	; patched domain-containing protein 3|similar to CG11212-PA|AUGUSTUS-3.0.2_34308|GLEAN_12361|Patched domain-containing protein 3-like Protein
894	LOC655574	2.90302	7.0341e-06	TcasGA2_TC014546	uncharacterized protein PFB0145c	; uncharacterized protein PFB0145c|GLEAN_14546|GLEAN_14547|diphthine synthase
895	LOC658154	2.89999	0.0119629	TcasGA2_TC011641	alpha-2C adrenergic receptor	; alpha-2C adrenergic receptor|AUGUSTUS-3.0.2_11641|CG18208-like amine receptor|GLEAN_11641
896	LOC656582	2.89797	0.0167391	TcasGA2_TC003571	uncharacterized LOC656582	; uncharacterized protein LOC656582|AUGUSTUS-3.0.2_03571|GLEAN_03571|cylicin-2
897	LOC661524	2.8962	0.00534665	TcasGA2_TC010784, InR, ilr1	insulin-like receptor	; insulin-like receptor|AUGUSTUS-3.0.2_10784|GLEAN_10784|insulin-like receptor 1
898	LOC657272	2.89576	6.68414e-11	TcasGA2_TC014942	fasciclin-3	; fasciclin-3|AUGUSTUS-3.0.2_14942|Fasciclin-3-like Protein|GLEAN_14942|GLEAN_14943
899	Mmp-1	2.89548	0.00463804	TcasGA2_TC014266, Mmp1	matrix metalloproteinase 1	; matrix metalloproteinase 1|GLEAN_14266
900	LOC658443	2.8945	2.84409e-05	TcasGA2_TC033642	uncharacterized LOC658443	; uncharacterized protein LOC658443|AUGUSTUS-3.0.2_33642
901	LOC100141756	2.89386	0.00357835	TcasGA2_TC015091	uncharacterized LOC100141756	; uncharacterized protein LOC100141756|AUGUSTUS-3.0.2_15091|GLEAN_15091
902	LOC663368	2.88799	0.011569	TcasGA2_TC015667	tyrosine-protein kinase transmembrane receptor Ror	; tyrosine-protein kinase transmembrane receptor Ror|AUGUSTUS-3.0.2_15667|GLEAN_15667|Tyrosine-protein kinase transmembrane receptor Ror-like Protein
903	LOC660517	2.88797	0.00885678	TcasGA2_TC005176	inositol 1,4,5-trisphosphate receptor	; inositol 1,4,5-trisphosphate receptor|AUGUSTUS-3.0.2_31521|GLEAN_05176|Inositol 1,4,5-trisphosphate receptor-like Protein|inositol 1,4,5-trisphosphate receptor IP3R
904	LOC664070	2.88643	1.05335e-07	TcasGA2_TC005707	protein gustavus	; SPRY domain-containing SOCS box protein 1|protein gustavus|AUGUSTUS-3.0.2_34075|GLEAN_05707|GLEAN_05708|GLEAN_05709|Protein gustavus-like Protein
905	LOC661242	2.88489	6.16096e-08	TcasGA2_TC004799	dnaJ protein homolog 1	; dnaJ protein homolog 1|AUGUSTUS-3.0.2_04799|DnaJ protein homolog 1-like Protein|GLEAN_04799
906	LOC660901	2.88332	9.10383e-15	TcasGA2_TC012681	N-acetyl-D-glucosamine kinase	; N-acetyl-D-glucosamine kinase|AUGUSTUS-3.0.2_12681|GLEAN_12681|N-acetyl-D-glucosamine kinase-like Protein
907	Exd	2.88296	1.21886e-09	TcasGA2_TC011311	extradenticle	; extradenticle|AUGUSTUS-3.0.2_11311|GLEAN_11311|Homeobox protein extradenticle-like Protein
908	LOC658796	2.88232	9.67426e-06	TcasGA2_TC014369	hypothetical protein	; uncharacterized protein LOC658796|GLEAN_14369
909	LOC103315151	2.88232	0.0332658	TcasGA2_TC000805	tudor domain-containing protein 5	; tudor domain-containing protein 5|AUGUSTUS-3.0.2_00805|GLEAN_00805
910	LOC100141744	2.88165	0.00958944	TcasGA2_TC008111	gem-associated protein 5	; gem-associated protein 5|AUGUSTUS-3.0.2_08111|GLEAN_08111
911	LOC657906	2.88066	0.00422427	TcasGA2_TC012533	uncharacterized LOC657906	; uncharacterized protein LOC657906|AUGUSTUS-3.0.2_12533|GLEAN_12533
912	LOC657699	2.87931	8.40003e-07	TcasGA2_TC004834	transcription elongation factor B polypeptide 2	; transcription elongation factor B polypeptide 2|AUGUSTUS-3.0.2_04834|GLEAN_04834|Transcription elongation factor B polypeptide 2-like Protein
913	LOC658669	2.87273	0.00226605	TcasGA2_TC014811	decaprenyl-diphosphate synthase subunit 2	; decaprenyl-diphosphate synthase subunit 2|GLEAN_14811
914	LOC662645	2.87052	0.00106619	TcasGA2_TC008921	AMP deaminase 2	; AMP deaminase 2|AMP deaminase 2-like Protein|AUGUSTUS-3.0.2_08921|GLEAN_08921
915	LOC103312947	2.86991	0.00168508	TcasGA2_TC014042, Fadd	uncharacterized LOC103312947	; uncharacterized protein LOC103312947|AUGUSTUS-3.0.2_14042|Fas (TNFRSF6)-associated via death domain|GLEAN_14042
916	LOC656222	2.86914	2.74181e-12		UDP-xylose and UDP-N-acetylglucosamine transporter	; UDP-xylose and UDP-N-acetylglucosamine transporter|AUGUSTUS-3.0.2_01443|GLEAN_01443|UDP-xylose and UDP-N-acetylglucosamine transporter-like Protein
917	LOC658365	2.86879	0.000899545	TcasGA2_TC033736	DNA-directed RNA polymerase III subunit RPC7-like	; DNA-directed RNA polymerase III subunit RPC7-like|AUGUSTUS-3.0.2_33736
918	LOC657109	2.86858	0.000588489	TcasGA2_TC015350	mediator of RNA polymerase II transcription subunit 31	; mediator of RNA polymerase II transcription subunit 31|AUGUSTUS-3.0.2_33301|GLEAN_15350|Mediator of RNA polymerase II transcription subunit 31-like Protein
919	LOC661154	2.86829	0.00357017	TcasGA2_TC014660	2',5'-phosphodiesterase 12	; 2',5'-phosphodiesterase 12|GLEAN_14660|GLEAN_14661
920	LOC656276	2.85999	0.0258973	TcasGA2_TC015013	60S acidic ribosomal protein P2	; 60S acidic ribosomal protein P2|60S acidic ribosomal protein P2-like Protein|AUGUSTUS-3.0.2_15013|GLEAN_15013
921	LOC655705	2.85977	8.88178e-16	TcasGA2_TC012512	ABC transporter G family member 20	; ABC transporter G family member 20|ABC transporter G family member 23-like Protein|AUGUSTUS-3.0.2_12512|GLEAN_12512
922	LOC655865	2.85802	0.00452136	TcasGA2_TC015749	diphthamide biosynthesis protein 2	; diphthamide biosynthesis protein 2|AUGUSTUS-3.0.2_15749|Diphthamide biosynthesis protein 2-like Protein|GLEAN_15749
923	LOC661248	2.85755	0.00774251	TcasGA2_TC032130	tyrosine-protein phosphatase non-receptor type 21	; LOW QUALITY PROTEIN: tyrosine-protein phosphatase non-receptor type 21|AUGUSTUS-3.0.2_32130|AUGUSTUS-3.0.2_32131|Protein 4.1 homolog-like Protein
924	LOC664233	2.85551	0.00014661	TcasGA2_TC007113	programmed cell death protein 2	; programmed cell death protein 2|AUGUSTUS-3.0.2_07113|GLEAN_07113|Programmed cell death protein 2-like Protein
925	LOC657428	2.85361	0	TcasGA2_TC006047	phosphatidylinositol transfer protein alpha isoform	; phosphatidylinositol transfer protein alpha isoform|AUGUSTUS-3.0.2_06047|GLEAN_06047|Protein retinal degeneration B-like Protein
926	az	2.85147	0.00359021	TcasGA2_TC009606	ornithine decarboxylase antizyme az	; ornithine decarboxylase antizyme az|AUGUSTUS-3.0.2_09606|GLEAN_09606|Ornithine decarboxylase antizyme 1-like Protein
927	LOC657104	2.84887	0.00558663	TcasGA2_TC013551	transmembrane protein 43 homolog	; transmembrane protein 43 homolog|GLEAN_13551
928	LOC656587	2.84733	0.000301891	TcasGA2_TC003849	transmembrane channel-like protein 7	; transmembrane channel-like protein 7|AUGUSTUS-3.0.2_03849|GLEAN_03849
929	LOC103312517	2.84452	0.0021475	TcasGA2_TC007750	26S proteasome non-ATPase regulatory subunit 10	; 26S proteasome non-ATPase regulatory subunit 10|AUGUSTUS-3.0.2_07750|Ankyrin repeat and KH domain-containing protein mask-like Protein|GLEAN_07750
930	LOC655907	2.84087	0.0378219	TcasGA2_TC009595	peroxisomal membrane protein PEX13	; peroxisomal membrane protein PEX13|AUGUSTUS-3.0.2_09595|GLEAN_09595|Peroxisomal membrane protein PEX13-like Protein
931	LOC100142203	2.84069	0.011115	TcasGA2_TC010945	general transcription factor 3C polypeptide 5	; general transcription factor 3C polypeptide 5|AUGUSTUS-3.0.2_10945|GLEAN_10945|General transcription factor 3C polypeptide 5-like Protein
932	LOC658612	2.84013	0.0428812		hypothetical protein	; protein FAM195A|uncharacterized protein LOC658612|AUGUSTUS-3.0.2_02283|GLEAN_02283
933	LOC662631	2.84003	0.0147834	TcasGA2_TC001357	formin-like protein 8	; formin-like protein 8|AUGUSTUS-3.0.2_01357|GLEAN_01357
934	LOC659994	2.83946	2.61217e-10	TcasGA2_TC009539	RNA-binding protein pno1	; RNA-binding protein pno1|AUGUSTUS-3.0.2_09539|GLEAN_09539|RNA-binding protein pno1-like Protein
935	LOC660909	2.83891	0.000144929	TcasGA2_TC001602, bun, bunched	protein bunched, class 2/F/G isoform	; protein bunched, class 2/F/G isoform|uncharacterized protein LOC660909|AUGUSTUS-3.0.2_01602|GLEAN_01602
936	LOC103312146	2.83734	5.75088e-10	TcasGA2_TC035044	uncharacterized LOC103312146	; uncharacterized protein LOC103312146|AUGUSTUS-3.0.2_35044|GLEAN_01472
937	LOC656183	2.83539	0.00377473	TcasGA2_TC013927	replication factor C subunit 1	; replication factor C subunit 1|AUGUSTUS-3.0.2_13927|GLEAN_13927|Replication factor C subunit 1-like Protein
938	LOC655543	2.83446	0.0152532	TcasGA2_TC005584	transcription elongation factor SPT6	; transcription elongation factor SPT6|AUGUSTUS-3.0.2_05584|GLEAN_05584|Transcription elongation factor SPT6-like Protein
939	LOC100142574	2.8302	0.0120255	TcasGA2_TC006279, fem	female-specific feminizer isoform f	; serine/arginine repetitive matrix protein 1|AUGUSTUS-3.0.2_06279|GLEAN_06279
940	LOC661297	2.83017	0.0321857	TcasGA2_TC005184	laminin subunit beta-1	; laminin subunit beta-1|AUGUSTUS-3.0.2_05184|GLEAN_05184|Laminin subunit beta-1-like Protein
941	LOC655844	2.83	5.03145e-06	TcasGA2_TC002602	ecotropic viral integration site 5 ortholog	; ecotropic viral integration site 5 ortholog|AUGUSTUS-3.0.2_02602|Ecotropic viral integration site 5 ortholog-like Protein|GLEAN_02602
942	LOC658265	2.82883	0.0246362	TcasGA2_TC030737	cell division cycle protein 16 homolog	; cell division cycle protein 16 homolog|AUGUSTUS-3.0.2_30737|Cell division cycle protein 16 homolog-like Protein|GLEAN_11473-OG4912
943	LOC659486	2.82825	4.61529e-07	TcasGA2_TC010893	adenylate cyclase type 6	; adenylate cyclase type 6|AUGUSTUS-3.0.2_33004|AUGUSTUS-3.0.2_34682|Adenylate cyclase type 5-like Protein|GLEAN_10893
944	LOC654960	2.82816	1.83972e-05	TcasGA2_TC004686	uncharacterized LOC654960	; uncharacterized protein LOC654960|AUGUSTUS-3.0.2_04686|GLEAN_04686|sporulation-specific protein 15
945	LOC664277	2.82661	5.18452e-12	TcasGA2_TC007981	lipase 3	; lipase 3|AUGUSTUS-3.0.2_07981|GLEAN_07981|Lipase 3-like Protein
946	LOC656437	2.8242	0.00876848	TcasGA2_TC015354	myelin regulatory factor	; myelin regulatory factor|AUGUSTUS-3.0.2_15354|GLEAN_15354|Myelin regulatory factor-like Protein
947	LOC100141588	2.82187	0.000141668	TcasGA2_TC033320	ascorbate transporter, chloroplastic	; ascorbate transporter, chloroplastic|AUGUSTUS-3.0.2_33320|Putative inorganic phosphate cotransporter-like Protein|probable anion transporter 2, chloroplastic
948	LOC103315128	2.82125	0.0385093		toll-like receptor 13	; toll-like receptor 13
949	LOC100142344	2.82075	8.37713e-10	TcasGA2_TC015305	synaptosomal-associated protein 29	; synaptosomal-associated protein 29|AUGUSTUS-3.0.2_33325|GLEAN_15305|Synaptosomal-associated protein 29-like Protein
950	LOC655229	2.81984	0.00633064	TcasGA2_TC002130	phosducin-like protein	; phosducin-like protein|AUGUSTUS-3.0.2_02130|GLEAN_02130
951	LOC661487	2.81778	0.00229132	TcasGA2_TC010455	probable ubiquitin carboxyl-terminal hydrolase FAF-X	; probable ubiquitin carboxyl-terminal hydrolase FAF-X|AUGUSTUS-3.0.2_10455|GLEAN_10455|putative ubiquitin carboxyl-terminal hydrolase FAF-like Protein
952	LOC103312764	2.81638	0.0296005	TcasGA2_TC008526	WD repeat-containing protein 6	; WD repeat-containing protein 6|regulator of Ty1 transposition protein 10|AUGUSTUS-3.0.2_32960|GLEAN_08526|WD repeat-containing protein 6-like Protein
953	LOC661905	2.81626	2.67847e-06	TcasGA2_TC011813	serine/arginine repetitive matrix protein 2	; serine/arginine repetitive matrix protein 2|AUGUSTUS-3.0.2_11813|GLEAN_11813
954	LOC661351	2.81443	0.000896087	TcasGA2_TC004397, kinesin-2A	kinesin 2A	; kinesin-like protein Klp68D|AUGUSTUS-3.0.2_04397|GLEAN_04397|Kinesin-like protein Klp68D
955	LOC103313158	2.81314	0.0106517	TcasGA2_TC014465	importin subunit alpha-4	; importin subunit alpha-4|GLEAN_14465
956	LOC103314939	2.81219	0.0458727	TcasGA2_TC010406, GATAe, grain, grn	transcription factor GATA-4	; transcription factor GATA-4|transcription factor elt-1|AUGUSTUS-3.0.2_10406|GLEAN_10406
957	LOC660835	2.81214	0.0116688	TcasGA2_TC030543	mitochondrial tRNA-specific 2-thiouridylase 1	; mitochondrial tRNA-specific 2-thiouridylase 1|AUGUSTUS-3.0.2_30543|Mitochondrial tRNA-specific 2-thiouridylase 1-like Protein|NONGLEAN-OG12750
958	LOC658677	2.81175	0.0116005	TcasGA2_TC009436	glycosaminoglycan xylosylkinase homolog	; glycosaminoglycan xylosylkinase homolog|AUGUSTUS-3.0.2_09436|GLEAN_09436|Glycosaminoglycan xylosylkinase-like Protein
959	LOC660448	2.80618	0.00429963	TcasGA2_TC010850	myocyte-specific enhancer factor 2	; myocyte-specific enhancer factor 2|AUGUSTUS-3.0.2_10850|GLEAN_10850|Myocyte-specific enhancer factor 2-like Protein
960	LOC660383	2.80582	0.000401861	TcasGA2_TC011973	probable peptide chain release factor C12orf65, mitochondrial	; probable peptide chain release factor C12orf65, mitochondrial|AUGUSTUS-3.0.2_34877|GLEAN_11973|putative peptide chain release factor C12orf65 homolog, mitochondrial-like protein
961	LOC655857	2.80485	0.000803437	TcasGA2_TC014343	glycoprotein 3-alpha-L-fucosyltransferase A	; glycoprotein 3-alpha-L-fucosyltransferase A|GLEAN_14343
962	LOC655579	2.80225	0.00311051	TcasGA2_TC004856	receptor expression-enhancing protein 1	; receptor expression-enhancing protein 1|receptor expression-enhancing protein 4|AUGUSTUS-3.0.2_31982|AUGUSTUS-3.0.2_31983|GLEAN_04856|Receptor expression-enhancing protein 2-like Protein
963	LOC661314	2.80007	0.00301821	TcasGA2_TC002784, NVL	nuclear valosin-containing protein-like	; nuclear valosin-containing protein-like|AUGUSTUS-3.0.2_02784|GLEAN_02784|nuclear VCP-like
964	LOC656443	2.79916	0.00539579	TcasGA2_TC008731	poly(U)-specific endoribonuclease homolog	; poly(U)-specific endoribonuclease homolog|AUGUSTUS-3.0.2_08731|GLEAN_08731|Poly(U)-specific endoribonuclease homolog-like Protein
965	LOC657643	2.79905	0.000163497	TcasGA2_TC002462	carnitine O-palmitoyltransferase 1, liver isoform	; carnitine O-palmitoyltransferase 1, liver isoform|AUGUSTUS-3.0.2_02462|Choline O-acetyltransferase-like Protein|GLEAN_02462
966	LOC655990	2.79775	0.0238806	TcasGA2_TC004859	tankyrase	; tankyrase|AUGUSTUS-3.0.2_04859|GLEAN_04859|Tankyrase-like Protein
967	LOC659674	2.7974	0.000153294	TcasGA2_TC012666	serine/threonine-protein kinase NLK	; serine/threonine-protein kinase NLK|AUGUSTUS-3.0.2_12666|GLEAN_12666|Mitogen-activated protein kinase ERK-A-like Protein
968	LOC662347	2.79732	0.00862928	TcasGA2_TC009842	probable maleylacetoacetate isomerase 2	; probable maleylacetoacetate isomerase 2|AUGUSTUS-3.0.2_09842|GLEAN_09842|putative maleylacetoacetate isomerase 2-like Protein
969	LOC658326	2.79721	0.000709535	TcasGA2_TC013032	WD repeat and FYVE domain-containing protein 2	; WD repeat and FYVE domain-containing protein 2|GLEAN_13032
970	LOC655817	2.79691	3.72299e-07		dual specificity protein phosphatase 12	; dual specificity protein phosphatase 12|AUGUSTUS-3.0.2_05067|GLEAN_05067|Protein phosphatase Slingshot-like Protein
971	LOC662360	2.79358	0.005327	TcasGA2_TC008890	cuticle protein 21	; cuticle protein 21|AUGUSTUS-3.0.2_08890|GLEAN_08890
972	LOC659335	2.79338	2.67009e-11	TcasGA2_TC006476	RNA-binding protein lark	; RNA-binding protein lark|AUGUSTUS-3.0.2_06476|GLEAN_06476|RNA-binding protein lark-like Protein
973	LOC663019	2.79228	0.0137698	TcasGA2_TC015511	hypothetical protein	; restriction of telomere capping protein 5|uncharacterized protein LOC663019|AUGUSTUS-3.0.2_15511|GLEAN_15511
974	LOC103313374	2.79147	0.02448		uncharacterized LOC103313374
975	LOC657245	2.7904	0.0259047	TcasGA2_TC001222	corticotropin-releasing factor receptor 2	; corticotropin-releasing factor receptor 2|AUGUSTUS-3.0.2_01222|Calcitonin gene-related peptide type 1 receptor-like Protein|GLEAN_01222
976	LOC103312501	2.78961	0.0342844	TcasGA2_TC002427	uncharacterized LOC103312501	; uncharacterized protein LOC103312501|AUGUSTUS-3.0.2_02427
977	LOC658724	2.78901	0.0241533	TcasGA2_TC013896	sodium-dependent phosphate transporter 1	; sodium-dependent phosphate transporter 1|AUGUSTUS-3.0.2_32990|GLEAN_13896|GLEAN_13897|Sodium-dependent phosphate transporter 1-B-like Protein
978	LOC100141662	2.78624	0.0197935	TcasGA2_TC030465, Fst	follistatin	; follistatin|AUGUSTUS-3.0.2_30465|AUGUSTUS-3.0.2_31188|GLEAN_09170
979	LOC664354	2.78596	0.0483637	TcasGA2_TC008840	lanC-like protein 3 homolog	; lanC-like protein 3 homolog|AUGUSTUS-3.0.2_08840|GLEAN_08840
980	LOC103315214	2.78591	0.00181038		uncharacterized protein C19orf52	; uncharacterized protein C19orf52
981	LOC100322888	2.78383	1.7955e-05	TcasGA2_TC011917	uncharacterized protein LOC100322888	; uncharacterized protein LOC100322888|AUGUSTUS-3.0.2_11917
982	LOC664368	2.78347	4.27124e-05	TcasGA2_TC000931	histone H2A.V	; histone H2A.V|AUGUSTUS-3.0.2_00931|GLEAN_00931|Histone H2A.v-like Protein
983	LOC103313603	2.7826	0.00100232	TcasGA2_TC033629	uncharacterized LOC103313603	; uncharacterized protein LOC103313603|AUGUSTUS-3.0.2_33629
984	LOC657238	2.78245	1.16391e-09	TcasGA2_TC004514	protein couch potato	; protein couch potato|AUGUSTUS-3.0.2_31992|GLEAN_04514|GLEAN_04515|Protein couch potato-like Protein
985	LOC103313599	2.78078	0.0442787	TcasGA2_TC009679	trafficking protein particle complex subunit 10	; trafficking protein particle complex subunit 10|AUGUSTUS-3.0.2_09679|GLEAN_09679|Trafficking protein particle complex subunit 10-like Protein
986	LOC107398792	2.78039	0.0469367	TcasGA2_TC011447	ubiquinol-cytochrome-c reductase complex assembly factor 1	; ubiquinol-cytochrome-c reductase complex assembly factor 1|AUGUSTUS-3.0.2_11447|Ubiquinol-cytochrome-c reductase complex assembly factor 1-like Protein
987	LOC659368	2.77867	3.84159e-05	TcasGA2_TC000981, AChE, AChE-2, AO-Ace	acetylcholinesterase 2	; acetylcholinesterase 2|AUGUSTUS-3.0.2_00981
988	LOC658301	2.77581	1.83967e-05	TcasGA2_TC006738	glucose-induced degradation protein 4 homolog	; glucose-induced degradation protein 4 homolog|AUGUSTUS-3.0.2_06738|GLEAN_06738|Glucose-induced degradation protein 4 homolog-like Protein
989	LOC103312276	2.77484	0.0128117	TcasGA2_TC004711	major facilitator superfamily domain-containing protein 6	; major facilitator superfamily domain-containing protein 6|AUGUSTUS-3.0.2_04711|GLEAN_04711
990	LOC661608	2.77392	2.5007e-05	TcasGA2_TC005618	dual specificity mitogen-activated protein kinase kinase 6	; dual specificity mitogen-activated protein kinase kinase 6|AUGUSTUS-3.0.2_05618|Dual specificity mitogen-activated protein kinase kinase hemipterous-like Protein|GLEAN_05618
991	LOC656914	2.77316	0	TcasGA2_TC011019	tropomyosin-2	; tropomyosin-1, isoforms 9A/A/B|tropomyosin-2|AUGUSTUS-3.0.2_31441|AUGUSTUS-3.0.2_31442|GLEAN_11019|Tropomyosin-1, isoforms 9A/A/B-like Protein|Tropomyosin-2-like Protein
992	LOC103314235	2.77254	0.000901596	TcasGA2_TC012488	23 kDa integral membrane protein	; 23 kDa integral membrane protein|AUGUSTUS-3.0.2_12488|AUGUSTUS-3.0.2_34360|GLEAN_12489|Leukocyte surface antigen CD53-like Protein|Tetraspanin-33-like Protein
993	LOC657534	2.77235	0.0310451	TcasGA2_TC016380	autophagy-related protein 2 homolog A	; autophagy-related protein 2 homolog A|autophagy-related protein 2 homolog B|AUGUSTUS-3.0.2_16380|Autophagy-related protein 2 homolog B-like Protein|GLEAN_16380
994	LOC103315197	2.77159	0.0461841	TcasGA2_TC000350	uncharacterized LOC103315197	; uncharacterized protein LOC103315197|AUGUSTUS-3.0.2_00350|GLEAN_00350|HAUS augmin-like complex subunit 6
995	LOC656874	2.77155	0.0443686	TcasGA2_TC012248	hexosaminidase D	; hexosaminidase D|GLEAN_12248
996	LOC657351	2.77002	9.44171e-10	TcasGA2_TC006048	apoptosis-inducing factor 3	; apoptosis-inducing factor 3|AUGUSTUS-3.0.2_06048|Apoptosis-inducing factor 3-like Protein|GLEAN_06048
997	LOC107398339	2.76968	8.90634e-05	TcasGA2_TC008582	splicing factor U2af large subunit B-like	; splicing factor U2af large subunit B-like|GLEAN_08582|Retrovirus-related Pol polyprotein from transposon 297-like Protein
998	LOC654886	2.76869	0.000192747	TcasGA2_TC005895, Myo1A	myosin 1A	; myosin-IA|AUGUSTUS-3.0.2_05895|GLEAN_05895|Myosin-IA-like Protein
999	LOC662261	2.76845	0.00515335	TcasGA2_TC015207	endothelin-converting enzyme 1	; endothelin-converting enzyme 1|AUGUSTUS-3.0.2_15207|Endothelin-converting enzyme 1-like Protein|GLEAN_15207
1000	LOC103312286	2.76522	0.017599	TcasGA2_TC003371	lipopolysaccharide-induced tumor necrosis factor-alpha factor homolog	; lipopolysaccharide-induced tumor necrosis factor-alpha factor homolog|AUGUSTUS-3.0.2_03371|GLEAN_03371|Lipopolysaccharide-induced tumor necrosis factor-alpha factor homolog-like Protein
1001	LOC664325	2.76519	0.00828257	TcasGA2_TC007360	AF4/FMR2 family member 4	; AF4/FMR2 family member 4|AUGUSTUS-3.0.2_07360|AUGUSTUS-3.0.2_32824|GLEAN_07361|GLEAN_07362|GLEAN_07363
1002	LOC656536	2.76512	0.014906	TcasGA2_TC006724	rRNA methyltransferase 2, mitochondrial	; rRNA methyltransferase 2, mitochondrial|AUGUSTUS-3.0.2_06724|GLEAN_06724|Putative ribosomal RNA methyltransferase CG11447-like Protein|putative ribosomal RNA methyltransferase CG11447
1003	LOC657224	2.76462	0.000626691		remodeling and spacing factor 1	; remodeling and spacing factor 1|AUGUSTUS-3.0.2_04063|GLEAN_04063
1004	LOC656041	2.76266	0.0119997	TcasGA2_TC011656	hypothetical protein	; uncharacterized protein LOC656041|AUGUSTUS-3.0.2_11656|GLEAN_11656
1005	LOC661164	2.76169	0.0102602	TcasGA2_TC033584	CCHC-type zinc finger protein CG3800	; CCHC-type zinc finger protein CG3800|AUGUSTUS-3.0.2_33584|CCHC-type zinc finger protein CG3800-like Protein
1006	LOC657443	2.7599	9.52865e-05	TcasGA2_TC032520	metallophosphoesterase domain-containing protein 1-like	; metallophosphoesterase domain-containing protein 1-like|AUGUSTUS-3.0.2_32520|Metallophosphoesterase domain-containing protein 1-like Protein
1007	LOC103314084	2.75955	0.0109493	TcasGA2_TC005484	RING-H2 finger protein ATL20	; RING-H2 finger protein ATL20|AUGUSTUS-3.0.2_05484|E3 ubiquitin-protein ligase RNF139-like Protein|GLEAN_05484
1008	LOC659526	2.75948	0.00549255	TcasGA2_TC015082	DNA-directed RNA polymerase I subunit RPA1	; DNA-directed RNA polymerase I subunit RPA1|AUGUSTUS-3.0.2_15082|DNA-directed RNA polymerase I subunit RPA1-like Protein|GLEAN_15082
1009	LOC658754	2.75887	3.8943e-05	TcasGA2_TC010495	MAP kinase-interacting serine/threonine-protein kinase 1	; MAP kinase-interacting serine/threonine-protein kinase 1|AUGUSTUS-3.0.2_10495|Calcium/calmodulin-dependent protein kinase type II alpha chain-like Protein|GLEAN_10495
1010	LOC103313281	2.75864	0.0110271	TcasGA2_TC013089	transcription factor Adf-1	; transcription factor Adf-1|GLEAN_13089
1011	LOC656063	2.75599	0.00590934	TcasGA2_TC013925	Y-box factor homolog	; Y-box factor homolog|nuclease-sensitive element-binding protein 1|AUGUSTUS-3.0.2_13925|GLEAN_13925|Y-box factor homolog-like Protein
1012	LOC654879	2.75553	0	TcasGA2_TC015669	alpha-tocopherol transfer protein	; alpha-tocopherol transfer protein|AUGUSTUS-3.0.2_15669|Alpha-tocopherol transfer protein-like Protein|GLEAN_15669
1013	LOC657015	2.75445	1.40231e-07	TcasGA2_TC004027	carboxypeptidase A	; carboxypeptidase B|AUGUSTUS-3.0.2_04027|GLEAN_04027
1014	LOC663799	2.75161	0.00113408	TcasGA2_TC013356	probable Golgi SNAP receptor complex member 2	; probable Golgi SNAP receptor complex member 2|GLEAN_13356
1015	LOC658185	2.75145	0.0195885	TcasGA2_TC001109	spectrin beta chain, non-erythrocytic 1	; spectrin alpha chain, non-erythrocytic 1|spectrin beta chain, non-erythrocytic 1|AUGUSTUS-3.0.2_01109|GLEAN_01109|Spectrin beta chain, non-erythrocytic 5-like Protein
1016	LOC103313646	2.75086	0.0437602	TcasGA2_TC032693	cyclic GMP-AMP synthase-like	; cyclic GMP-AMP synthase-like|uncharacterized protein LOC103313646|AUGUSTUS-3.0.2_32693
1017	LOC656597	2.74952	2.20246e-05	TcasGA2_TC013813	uncharacterized LOC656597	; uncharacterized protein LOC656597|AUGUSTUS-3.0.2_13813|GLEAN_13813
1018	LOC663294	2.74688	0.000131441	TcasGA2_TC009325	fumarylacetoacetase	; fumarylacetoacetase|AUGUSTUS-3.0.2_09325|Fumarylacetoacetase-like Protein|GLEAN_09325
1019	LOC656477	2.74639	1.43507e-12	TcasGA2_TC031122	puromycin-sensitive aminopeptidase-like protein	; puromycin-sensitive aminopeptidase-like protein|AUGUSTUS-3.0.2_31122|GLEAN_02353|GLEAN_02354|aminopeptidase-like protein
1020	LOC654990	2.74508	0.0247269	TcasGA2_TC014339	nuclear pore complex protein Nup214	; nuclear pore complex protein Nup214|AUGUSTUS-3.0.2_14339|GLEAN_14339
1021	LOC661553	2.74345	0.00124291	TcasGA2_TC015725	glucose dehydrogenase [FAD, quinone]	; glucose dehydrogenase [FAD, quinone]|AUGUSTUS-3.0.2_33430|GLEAN_15725
1022	LOC103313244	2.74333	0.000661619	TcasGA2_TC014610	sentrin-specific protease	; sentrin-specific protease|GLEAN_14610
1023	LOC103314349	2.74232	0.0205938		equilibrative nucleoside transporter 2-like	; equilibrative nucleoside transporter 2-like
1024	LOC655620	2.74144	1.27749e-05	TcasGA2_TC005583	S-adenosylmethionine decarboxylase proenzyme	; S-adenosylmethionine decarboxylase proenzyme|AUGUSTUS-3.0.2_05583|GLEAN_05583|S-adenosylmethionine decarboxylase proenzyme-like Protein
1025	LOC656089	2.74025	3.43159e-07	TcasGA2_TC002490	ubiquitin carboxyl-terminal hydrolase isozyme L5	; ubiquitin carboxyl-terminal hydrolase isozyme L5|AUGUSTUS-3.0.2_02490|GLEAN_02490|Ubiquitin carboxyl-terminal hydrolase calypso-like Protein
1026	LOC659724	2.73951	0.0334624	TcasGA2_TC014633	WD repeat-containing protein 59	; WD repeat-containing protein 59|similar to WD repeat-containing protein 59|GLEAN_14633
1027	LOC658356	2.73617	0.00355156	TcasGA2_TC013310, serpin28	serpin B3	; ovalbumin-related protein X|serpin B3|GLEAN_13310|serpin peptidase inhibitor 28
1028	LOC657755	2.73569	0.0375859	TcasGA2_TC000108	protein furry	; protein furry|AUGUSTUS-3.0.2_00108|GLEAN_00108|Protein furry homolog-like
1029	LOC656758	2.73326	0.0157094	TcasGA2_TC008513, ATP20	ATP synthase subunit g, mitochondrial	; ATP synthase subunit g, mitochondrial|ATP synthase subunit g, mitochondrial-like Protein|AUGUSTUS-3.0.2_08513|GLEAN_08513
1030	LOC655917	2.73312	0.0435889	TcasGA2_TC000627	cysteine and histidine-rich domain-containing protein	; cysteine and histidine-rich domain-containing protein|AUGUSTUS-3.0.2_00627|Cysteine and histidine-rich domain-containing protein-like Protein|GLEAN_00627
1031	LOC661825	2.73284	0.0435891	TcasGA2_TC004800, kinesin-4A	kinesin 4A	; kinesin-like protein KIF21A|AUGUSTUS-3.0.2_04800|GLEAN_04800|Kinesin-like protein KIF21A
1032	LOC659912	2.73214	0.038117	TcasGA2_TC002804	collagen alpha-2(IV) chain	; collagen alpha-2(IV) chain|AUGUSTUS-3.0.2_02804|GLEAN_02804|collagen alpha-1(III) chain
1033	LOC657078	2.72987	0.020289	TcasGA2_TC011288	calcium-activated potassium channel slowpoke	; calcium-activated potassium channel slowpoke|AUGUSTUS-3.0.2_11288|Calcium-activated potassium channel slowpoke-like Protein|GLEAN_11288
1034	LOC655565	2.72666	0.000402324	TcasGA2_TC016364	S-methyl-5'-thioadenosine phosphorylase	; S-methyl-5'-thioadenosine phosphorylase|AUGUSTUS-3.0.2_16364|GLEAN_16364|S-methyl-5'-thioadenosine phosphorylase-like Protein
1035	LOC662270	2.7244	0.000972663	TcasGA2_TC009841	transmembrane protein 8A	; transmembrane protein 8A|AUGUSTUS-3.0.2_09841|GLEAN_09841|Transmembrane protein 8A-like Protein
1036	Cyp4g14	2.72326	0.00535552	TcasGA2_TC008058	cytochrome P450 monooxygenase	; cytochrome P450 monooxygenase|AUGUSTUS-3.0.2_08058|GLEAN_08058|cytochrome P450-like protein
1037	LOC664462	2.72221	1.04479e-05	TcasGA2_TC008808	protein fem-1 homolog B	; protein fem-1 homolog B|AUGUSTUS-3.0.2_08808|GLEAN_08808|Protein fem-1 homolog B-like Protein
1038	LOC657583	2.7215	0.0007491	TcasGA2_TC009207	protein SEC13 homolog	; protein SEC13 homolog|AUGUSTUS-3.0.2_09207|GLEAN_09207|POC1 centriolar protein homolog-like Protein
1039	LOC100142170	2.71817	0.00310923	TcasGA2_TC014886	uncharacterized LOC100142170	; uncharacterized protein LOC100142170|AUGUSTUS-3.0.2_14886|GLEAN_14886
1040	LOC659856	2.71742	4.07881e-06	TcasGA2_TC013418	hypothetical protein	; uncharacterized protein LOC659856|AUGUSTUS-3.0.2_13418|GLEAN_13418
1041	LOC103315067	2.71455	2.69352e-05	TcasGA2_TC000532	uncharacterized LOC103315067	; LOW QUALITY PROTEIN: uncharacterized protein LOC103315067|AUGUSTUS-3.0.2_32146|AUGUSTUS-3.0.2_32147|GLEAN_00532|Protein PRRC2A-like Protein
1042	LOC657154	2.71232	0.0331252		ice-structuring glycoprotein	; ice-structuring glycoprotein|AUGUSTUS-3.0.2_08553|GLEAN_08553
1043	LOC663238	2.70824	1.66533e-14	TcasGA2_TC005740, serpin7, serpin8	serpin peptidase inhibitor 7	; alaserpin|AUGUSTUS-3.0.2_05740|AUGUSTUS-3.0.2_05741|GLEAN_05740|GLEAN_05741|serpin peptidase inhibitor 8
1044	LOC103313489	2.70745	0.00125851	TcasGA2_TC009390	probable ATP-dependent RNA helicase DDX27	; probable ATP-dependent RNA helicase DDX27|AUGUSTUS-3.0.2_09390|GLEAN_09390|putative ATP-dependent RNA helicase DDX27-like Protein
1045	LOC656406	2.70627	1.74332e-08	TcasGA2_TC011214	putative fatty acyl-CoA reductase CG5065	; putative fatty acyl-CoA reductase CG5065|AUGUSTUS-3.0.2_11214|GLEAN_11214|Putative fatty acyl-CoA reductase CG5065-like Protein
1046	LOC655151	2.7034	1.54058e-07	TcasGA2_TC012071	tetraspanin-33	; tetraspanin-33|AUGUSTUS-3.0.2_12071|GLEAN_12071|Tetraspanin-33-like Protein
1047	LOC661672	2.70161	0.034243	TcasGA2_TC003462	THUMP domain-containing protein 1 homolog	; THUMP domain-containing protein 1 homolog|AUGUSTUS-3.0.2_03462|GLEAN_03462|THUMP domain-containing protein 1 homolog-like Protein
1048	LOC655778	2.69881	2.51707e-05	TcasGA2_TC015747	TBC1 domain family member 1	; TBC1 domain family member 1|AUGUSTUS-3.0.2_15747|GLEAN_15747|TBC1 domain family member 1-like Protein
1049	LOC658144	2.69802	4.8485e-07	TcasGA2_TC006465, Myo15	myosin 15	; unconventional myosin-XV|AUGUSTUS-3.0.2_06465|GLEAN_06465
1050	LOC663989	2.69775	3.56536e-05	TcasGA2_TC011741	F-box/LRR-repeat protein 2	; F-box/LRR-repeat protein 2|AUGUSTUS-3.0.2_34446|F-box/LRR-repeat protein 7-like Protein|GLEAN_11741|GLEAN_11742
1051	LOC659554	2.69625	0.0180266	TcasGA2_TC015066	vinculin	; vinculin|AUGUSTUS-3.0.2_15066|GLEAN_15066|Vinculin-like Protein
1052	LOC659727	2.69468	8.72978e-06	TcasGA2_TC015626	transcription elongation factor SPT5	; transcription elongation factor SPT5|AUGUSTUS-3.0.2_15626|GLEAN_15626|Transcription elongation factor SPT5-like Protein
1053	LOC658109	2.69417	0.00129295	TcasGA2_TC003332	mediator of RNA polymerase II transcription subunit 24	; mediator of RNA polymerase II transcription subunit 24|AUGUSTUS-3.0.2_03332|GLEAN_03332|Mediator of RNA polymerase II transcription subunit 24-like Protein
1054	LOC664449	2.69235	0.028234	TcasGA2_TC008178	centrosomal protein of 135 kDa	; centrosomal protein of 135 kDa|AUGUSTUS-3.0.2_31105|GLEAN_08178|GLEAN_08179
1055	LOC661985	2.69039	0.033908	TcasGA2_TC005910	kinase suppressor of Ras 2	; kinase suppressor of Ras 2|AUGUSTUS-3.0.2_05910|GLEAN_05910|Kinase suppressor of Ras 2-like Protein
1056	LOC657633	2.68648	9.76339e-05	TcasGA2_TC001226	proteoglycan 4	; proteoglycan 4|AUGUSTUS-3.0.2_01226|GLEAN_01226
1057	LOC655993	2.68502	0.00071152	TcasGA2_TC011106	phenylalanine--tRNA ligase alpha subunit	; phenylalanine--tRNA ligase alpha subunit|AUGUSTUS-3.0.2_11106|GLEAN_11106|probable phenylalanine--tRNA ligase alpha subunit|putative phenylalanine--tRNA ligase alpha subunit-like Protein
1058	LOC655627	2.6849	0.014504	TcasGA2_TC011864	CD63 antigen	; CD63 antigen|AUGUSTUS-3.0.2_11864|GLEAN_11864
1059	LOC100141956	2.68483	0.00267435	TcasGA2_TC031506	cullin-4A	; cullin-4A|AUGUSTUS-3.0.2_31506|Cullin homolog 1-like Protein
1060	LOC658036	2.68285	0.00124543	TcasGA2_TC007086	PERQ amino acid-rich with GYF domain-containing protein CG11148	; PERQ amino acid-rich with GYF domain-containing protein CG11148|AUGUSTUS-3.0.2_07086|GLEAN_07086|PERQ amino acid-rich with GYF domain-containing protein 2
1061	LOC661572	2.6768	0.0371404	TcasGA2_TC004400	E3 ubiquitin-protein ligase UBR4	; E3 ubiquitin-protein ligase UBR4|AUGUSTUS-3.0.2_04400|GLEAN_04400|Protein purity of essence-like Protein
1062	LOC660403	2.67426	0.00387097	TcasGA2_TC003095	adenylate cyclase type 2	; adenylate cyclase type 2|AUGUSTUS-3.0.2_32331|Adenylate cyclase type 2-like Protein|GLEAN_03095|GLEAN_03096
1063	LOC655119	2.67348	0.0486427	TcasGA2_TC007660	autophagy-related 12-like	; autophagy protein 12-like|AUGUSTUS-3.0.2_07660|Autophagy protein 12-like|GLEAN_07660
1064	LOC656220	2.67331	3.95469e-08		uncharacterized LOC656220	; uncharacterized protein LOC656220|AUGUSTUS-3.0.2_05104|GLEAN_05104
1065	LOC654859	2.67193	1.96543e-09	TcasGA2_TC002778	muscle M-line assembly protein unc-89	; muscle M-line assembly protein unc-89|AUGUSTUS-3.0.2_32479|GLEAN_02778|GLEAN_02779|Muscle M-line assembly protein unc-89-like Protein
1066	LOC662321	2.6707	0.00328218	TcasGA2_TC009956, GLEAN_09956	ADFb like protein	; ADFb like protein|AUGUSTUS-3.0.2_09956
1067	LOC103313420	2.66933	0.000410261	TcasGA2_TC015025	hypothetical protein	; uncharacterized protein LOC103313420|AUGUSTUS-3.0.2_15025|GLEAN_15025
1068	LOC662563	2.66864	1.24489e-07	TcasGA2_TC012585	mitoferrin-1	; mitoferrin-1|AUGUSTUS-3.0.2_12585|GLEAN_12585|Mitoferrin-like Protein
1069	LOC659253	2.66743	0.0458333	TcasGA2_TC008704	L-threonine ammonia-lyase	; L-threonine ammonia-lyase|AUGUSTUS-3.0.2_08704|GLEAN_08704|L-threonine dehydratase catabolic TdcB-like Protein|threo-3-hydroxyaspartate ammonia-lyase
1070	LOC657231	2.66627	6.98447e-06		neurofilament heavy polypeptide	; neurofilament heavy polypeptide|AUGUSTUS-3.0.2_02346|GLEAN_02346
1071	LOC663347	2.66613	0.0454313	TcasGA2_TC003488	cyclin-dependent kinase 10	; cyclin-dependent kinase 10|AUGUSTUS-3.0.2_03488|GLEAN_03488|Serine/threonine-protein kinase PITSLRE-like Protein
1072	LOC656847	2.66425	0.0340414	TcasGA2_TC008243	DNA-binding protein D-ETS-4	; DNA-binding protein D-ETS-4|AUGUSTUS-3.0.2_08243|DNA-binding protein D-ETS-4-like Protein|GLEAN_08243
1073	LOC100142506	2.66326	0.0101938	TcasGA2_TC015028	hypothetical protein	; uncharacterized protein LOC100142506|AUGUSTUS-3.0.2_15028|GLEAN_15028
1074	LOC100142264	2.66282	0.0129389	TcasGA2_TC014789	methyltransferase-like protein 13	; methyltransferase-like protein 13|GLEAN_14789
1075	LOC660834	2.6628	0.00308835	TcasGA2_TC033525	clavesin-2	; clavesin-2|AUGUSTUS-3.0.2_33525|Clavesin-1-like Protein
1076	LOC659771	2.66079	0.000664294	TcasGA2_TC002805	dnaJ homolog subfamily C member 22	; dnaJ homolog subfamily C member 22|AUGUSTUS-3.0.2_02805|DnaJ homolog subfamily C member 22-like Protein|GLEAN_02805
1077	LOC661095	2.65918	0.0441828	TcasGA2_TC014026, Dredd, casp8	death related ced-3/Nedd2-like protein	; caspase-8|AUGUSTUS-3.0.2_14026|GLEAN_14026
1078	LOC657955	2.656	0.00384218	TcasGA2_TC002667	uncharacterized LOC657955	; uncharacterized protein LOC657955|AUGUSTUS-3.0.2_02667|GLEAN_02667|myosin-3
1079	LOC659947	2.65538	4.97066e-06	TcasGA2_TC031688	uncharacterized LOC659947	; uncharacterized protein LOC659947|AUGUSTUS-3.0.2_31688|GLEAN_02306|GLEAN_02307
1080	LOC655645	2.65509	0.0415776	TcasGA2_TC015920	trafficking protein particle complex subunit 13	; trafficking protein particle complex subunit 13|AUGUSTUS-3.0.2_15920|GLEAN_15920|putative trafficking protein particle complex subunit 13 homolog-like Protein
1081	LOC664275	2.65472	0.00119368	TcasGA2_TC001076, hdc, headcase	headcase protein	; headcase protein|AUGUSTUS-3.0.2_30998|GLEAN_01076|GLEAN_01081|Headcase protein-like Protein
1082	LOC658080	2.65372	1.17353e-10	TcasGA2_TC010681	sodium- and chloride-dependent GABA transporter ine	; sodium- and chloride-dependent GABA transporter ine|AUGUSTUS-3.0.2_10681|GLEAN_10681|Sodium- and chloride-dependent GABA transporter ine-like Protein
1083	LOC658248	2.65264	0.0232778		AH receptor-interacting protein	; AH receptor-interacting protein|AUGUSTUS-3.0.2_02337|FK506-binding protein 59-like Protein|GLEAN_02337
1084	LOC100141977	2.65131	0.00222077	TcasGA2_TC009797	serine/threonine-protein kinase TBK1	; serine/threonine-protein kinase TBK1|AUGUSTUS-3.0.2_09797|GLEAN_09797|Serine/threonine-protein kinase TBK1-like Protein
1085	LOC656375	2.65126	0.00562387	TcasGA2_TC011718, serpin27	serpin peptidase inhibitor 27	; serpin B6|AUGUSTUS-3.0.2_11718|GLEAN_11718
1086	LOC657691	2.65108	0.00184124		protein FRG1 homolog	; protein FRG1 homolog|AUGUSTUS-3.0.2_11566|GLEAN_11566|Protein FRG1 homolog-like Protein
1087	eIF-4E	2.64753	0.00735468	TcasGA2_TC012945	eukaryotic initiation factor 4E	; eukaryotic initiation factor 4E|AUGUSTUS-3.0.2_12945
1088	LOC661001	2.64692	0.00426065	TcasGA2_TC009621	INO80 complex subunit D-B	; INO80 complex subunit D-B|AUGUSTUS-3.0.2_09621|GLEAN_09621
1089	LOC656463	2.64661	0.0436624	TcasGA2_TC000098	prefoldin subunit 6	; prefoldin subunit 6|AUGUSTUS-3.0.2_00098|GLEAN_00098|putative prefoldin subunit 6-like Protein
1090	LOC656681	2.64479	0.0282495	TcasGA2_TC007092	uncharacterized LOC656681	; uncharacterized protein LOC656681|AUGUSTUS-3.0.2_07092|GLEAN_07092
1091	LOC655486	2.64393	2.55633e-09	TcasGA2_TC031801	ABC transporter A family member 1	; ABC transporter A family member 1|ATP-binding cassette sub-family A member 3|uncharacterized protein LOC655486|AUGUSTUS-3.0.2_31801|GLEAN_10722
1092	LOC103314685	2.64381	0.00929336	TcasGA2_TC000097	insulin-like growth factor-binding protein complex acid labile subunit	; insulin-like growth factor-binding protein complex acid labile subunit|AUGUSTUS-3.0.2_00097|Chaoptin-like Protein|GLEAN_00097
1093	LOC103312293	2.63938	0.00649957	TcasGA2_TC003398	paramyosin	; paramyosin|AUGUSTUS-3.0.2_03398|GLEAN_03398
1094	LOC661197	2.63859	0.0041559	TcasGA2_TC000304	glutaredoxin-3	; glutaredoxin-3|AUGUSTUS-3.0.2_00304|GLEAN_00304|Glutaredoxin 3-like Protein
1095	LOC656068	2.63479	6.24107e-10	TcasGA2_TC004744	ADP-ribosylation factor 6	; ADP-ribosylation factor 6|ADP-ribosylation factor 3-like Protein|GLEAN_04744
1096	LOC103314777	2.63384	0.0394778		uncharacterized F-box/LRR-repeat protein C02F5.7	; uncharacterized F-box/LRR-repeat protein C02F5.7|AUGUSTUS-3.0.2_02082|GLEAN_02082
1097	LOC661541	2.63234	0.00254252	TcasGA2_TC002423	brefeldin A-inhibited guanine nucleotide-exchange protein 1	; brefeldin A-inhibited guanine nucleotide-exchange protein 1|AUGUSTUS-3.0.2_02423|Brefeldin A-inhibited guanine nucleotide-exchange protein 2-like Protein|GLEAN_02423
1098	LOC654972	2.63074	0.00251056	TcasGA2_TC003025	ethanolamine-phosphate cytidylyltransferase	; ethanolamine-phosphate cytidylyltransferase|AUGUSTUS-3.0.2_03025|Ethanolamine-phosphate cytidylyltransferase-like Protein|GLEAN_03025
1099	LOC103312532	2.62754	0.0230047	TcasGA2_TC007711	mitochondrial import receptor subunit TOM70	; mitochondrial import receptor subunit TOM70|AUGUSTUS-3.0.2_07711|GLEAN_07711|Mitochondrial import receptor subunit TOM70-like Protein
1100	LOC658516	2.62714	0.00796189	TcasGA2_TC009712	peptidyl-prolyl cis-trans isomerase CWC27 homolog	; peptidyl-prolyl cis-trans isomerase CWC27 homolog|AUGUSTUS-3.0.2_09712|GLEAN_09712|Peptidyl-prolyl cis-trans isomerase CWC27 homolog-like Protein
1101	LOC655132	2.62674	1.15144e-07	TcasGA2_TC015441	coronin-6	; coronin-6|AUGUSTUS-3.0.2_15441|Coronin-6-like Protein|GLEAN_15441
1102	LOC656333	2.62595	0.0272494	TcasGA2_TC032344	B9 domain-containing protein 2	; B9 domain-containing protein 2|tectonic-1|AUGUSTUS-3.0.2_32344
1103	LOC664604	2.62559	0.0389236	TcasGA2_TC008754	putative tRNA (cytidine(32)/guanosine(34)-2'-O)-methyltransferase	; putative tRNA (cytidine(32)/guanosine(34)-2'-O)-methyltransferase|AUGUSTUS-3.0.2_08754|GLEAN_08754|Putative tRNA (cytidine(32)/guanosine(34)-2'-O)-methyltransferase 1-like Protein
1104	LOC659178	2.62547	0.00724773	TcasGA2_TC014630	protein FAM76A	; protein FAM76A|GLEAN_14630
1105	LOC660763	2.62509	6.54716e-08	TcasGA2_TC034594	lipopolysaccharide-induced tumor necrosis factor-alpha factor homolog	; lipopolysaccharide-induced tumor necrosis factor-alpha factor homolog|AUGUSTUS-3.0.2_34594|Cell death-inducing p53-target protein 1-like protein
1106	LOC663860	2.62449	9.59581e-08	TcasGA2_TC001050	microtubule-associated protein 2	; microtubule-associated protein 2|microtubule-associated protein tau|AUGUSTUS-3.0.2_32148|GLEAN_01050
1107	LOC659035	2.62185	0.00896225	TcasGA2_TC012490	CTL-like protein 1	; CTL-like protein 1|GLEAN_12490
1108	LOC658438	2.62112	0.000105013	TcasGA2_TC014887	farnesol dehydrogenase	; farnesol dehydrogenase|AUGUSTUS-3.0.2_14887|Dehydrogenase/reductase SDR family protein 7-like|GLEAN_14887
1109	LOC655664	2.6202	0.00376711		protein groucho-1	; protein groucho-1|AUGUSTUS-3.0.2_32209|GLEAN_01204|GLEAN_01205|GLEAN_01206|Protein groucho-like Protein|groucho-like protein
1110	LOC657585	2.6197	0.000292226	TcasGA2_TC009790	tyrosine-protein kinase Src42A	; tyrosine-protein kinase Src42A|AUGUSTUS-3.0.2_31200|GLEAN_09790|GLEAN_09791|GLEAN_09792|Tyrosine-protein kinase Src42A-like Protein
1111	LOC658501	2.61917	8.35405e-05	TcasGA2_TC013799	uncharacterized LOC658501	; uncharacterized protein LOC658501|AUGUSTUS-3.0.2_13799|GLEAN_13799|GLEAN_13800|GLEAN_13801|GLEAN_13802
1112	LOC655037	2.61803	0.000134	TcasGA2_TC003152	sorting nexin-14	; sorting nexin-14|AUGUSTUS-3.0.2_03152|GLEAN_03152|Sorting nexin-14-like Protein
1113	LOC655977	2.61793	1.47972e-08		cytosolic purine 5'-nucleotidase	; cytosolic purine 5'-nucleotidase|AUGUSTUS-3.0.2_02083|Cytosolic purine 5'-nucleotidase-like Protein|GLEAN_02083
1114	LOC658300	2.61689	0.000258496	TcasGA2_TC005482	forkhead box protein K1	; forkhead box protein K1|AUGUSTUS-3.0.2_05482|Forkhead box protein K1-like Protein|GLEAN_05482
1115	LOC657498	2.61571	0.0356756	TcasGA2_TC015546, CYP6BN1	cytochrome P450 6BN1	; probable cytochrome P450 6a23|AUGUSTUS-3.0.2_15546|GLEAN_15546
1116	LOC662712	2.61414	0.000981514	TcasGA2_TC009848	baculoviral IAP repeat-containing protein 6	; baculoviral IAP repeat-containing protein 6|AUGUSTUS-3.0.2_09848|GLEAN_09848
1117	LOC663099	2.61254	1.93203e-05	TcasGA2_TC015513, rho-4	rhomboid-4	; rhomboid-related protein 2|AUGUSTUS-3.0.2_15513|GLEAN_15513
1118	LOC656203	2.61145	0.000260051	TcasGA2_TC006318	BTB/POZ domain-containing protein KCTD5	; BTB/POZ domain-containing protein KCTD5|AUGUSTUS-3.0.2_06318|BTB/POZ domain-containing protein KCTD5-like Protein|GLEAN_06318
1119	LOC100141518	2.60957	0.0181985	TcasGA2_TC034378	uncharacterized LOC100141518	; uncharacterized protein LOC100141518|AUGUSTUS-3.0.2_34378
1120	LOC657746	2.60753	0.00354819	TcasGA2_TC011992	probable RNA methyltransferase bin3	; probable RNA methyltransferase bin3|AUGUSTUS-3.0.2_11992|GLEAN_11992
1121	LOC663941	2.60658	0.00908019	TcasGA2_TC001192, Tiap1	inhibitor of apoptosis 1	; death-associated inhibitor of apoptosis 1|inhibitor of apoptosis 1|AUGUSTUS-3.0.2_01192|Apoptosis 2 inhibitor-like Protein|GLEAN_01192
1122	LOC103315078	2.60211	0.000173873	TcasGA2_TC000578	delta(14)-sterol reductase	; delta(14)-sterol reductase|AUGUSTUS-3.0.2_00578|GLEAN_00578|Lamin-B receptor-like Protein
1123	LOC658899	2.60161	0.000934869	TcasGA2_TC010805	chromodomain-helicase-DNA-binding protein 1	; chromodomain-helicase-DNA-binding protein 1|AUGUSTUS-3.0.2_10805|Chromodomain-helicase-DNA-binding protein 1-like Protein|GLEAN_10805|GLEAN_10806
1124	LOC100141954	2.60041	0.0254337	TcasGA2_TC030661	sorting nexin-13	; sorting nexin-13|GLEAN_13177-OG2002
1125	LOC660722	2.59927	0.00314563	TcasGA2_TC015711	eukaryotic translation initiation factor 4H	; eukaryotic translation initiation factor 4H|AUGUSTUS-3.0.2_15711|GLEAN_15711
1126	LOC659444	2.59922	9.71356e-08	TcasGA2_TC000228	myosin light chain kinase, smooth muscle	; myosin light chain kinase, smooth muscle|AUGUSTUS-3.0.2_00228|GLEAN_00228|Myosin light chain kinase, smooth muscle-like Protein
1127	LOC655271	2.59743	0.00178511	TcasGA2_TC013919	transmembrane protein 98	; transmembrane protein 98|AUGUSTUS-3.0.2_13919|GLEAN_13919|Transmembrane protein 98-like Protein
1128	LOC659736	2.59682	0.000146776	TcasGA2_TC005801	hydroxysteroid dehydrogenase-like protein 2	; hydroxysteroid dehydrogenase-like protein 2|AUGUSTUS-3.0.2_05801|GLEAN_05801
1129	LOC661334	2.59574	2.74751e-10	TcasGA2_TC009456	uncharacterized LOC661334	; uncharacterized protein LOC661334|AUGUSTUS-3.0.2_09456|GLEAN_09456
1130	LOC660594	2.59533	4.46243e-05	TcasGA2_TC007071	uncharacterized LOC660594	; uncharacterized protein LOC660594|AUGUSTUS-3.0.2_07071|AUGUSTUS-3.0.2_07072|GLEAN_07071|GLEAN_07072|Monocarboxylate transporter 12-like Protein|Monocarboxylate transporter 6-like Protein
1131	LOC658025	2.59484	0.00917306	TcasGA2_TC003128	serine/threonine-protein kinase SMG1	; serine/threonine-protein kinase SMG1|AUGUSTUS-3.0.2_31024|GLEAN_03128|GLEAN_03129|Serine/threonine-protein kinase Smg1-like Protein
1132	LOC662813	2.59387	0.0105964	TcasGA2_TC000745	DNA damage-regulated autophagy modulator protein 2	; DNA damage-regulated autophagy modulator protein 2|AUGUSTUS-3.0.2_00745|DNA damage-regulated autophagy modulator protein 2-like Protein|GLEAN_00745
1133	LOC663895	2.59381	0.00572365	TcasGA2_TC007831	ets DNA-binding protein pokkuri	; ets DNA-binding protein pokkuri|AUGUSTUS-3.0.2_07831|GLEAN_07831
1134	LOC100142102	2.59272	0.0221922	TcasGA2_TC007508	phosphatidylinositol-glycan biosynthesis class X protein	; phosphatidylinositol-glycan biosynthesis class X protein|AUGUSTUS-3.0.2_07508|GLEAN_07508|Phosphatidylinositol-glycan biosynthesis class X protein-like Protein
1135	LOC660434	2.59088	0.0248829	TcasGA2_TC034026	broad-complex core protein isoform 6-like	; broad-complex core protein isoform 6-like|protein tramtrack, beta isoform-like|AUGUSTUS-3.0.2_34026|Zinc finger and BTB domain-containing protein 14-like Protein
1136	LOC662487	2.58959	0.00033343	TcasGA2_TC009845	neutral and basic amino acid transport protein rBAT	; neutral and basic amino acid transport protein rBAT|AUGUSTUS-3.0.2_09845|GLEAN_09845|Neutral and basic amino acid transport protein rBAT-like Protein
1137	LOC660589	2.58885	0.043928	TcasGA2_TC003093	proline-rich protein PRCC	; proline-rich protein PRCC|titin|AUGUSTUS-3.0.2_03093|GLEAN_03093
1138	LOC660509	2.58879	1.15983e-07	TcasGA2_TC010851, imd	immune deficiency	; uncharacterized protein LOC660509|AUGUSTUS-3.0.2_10851|GLEAN_10851
1139	LOC103313893	2.58411	0.0122719	TcasGA2_TC006244	TWiK family of potassium channels protein 7	; TWiK family of potassium channels protein 7|potassium channel subfamily K member 18|uncharacterized protein LOC103313893|AUGUSTUS-3.0.2_06244|AUGUSTUS-3.0.2_34005|GLEAN_06244
1140	LOC661192	2.58377	4.74703e-05	TcasGA2_TC011250	nicotinate phosphoribosyltransferase	; nicotinate phosphoribosyltransferase|AUGUSTUS-3.0.2_11250|GLEAN_11250|Nicotinate phosphoribosyltransferase-like Protein
1141	LOC661880	2.58326	3.01606e-05	TcasGA2_TC014037	signal transducing adapter molecule 2	; signal transducing adapter molecule 2|AUGUSTUS-3.0.2_14037|GLEAN_14037|Signal transducing adapter molecule 1-like Protein
1142	LOC663900	2.58029	0.00468755	TcasGA2_TC009961	protein CLP1 homolog	; protein CLP1 homolog|GLEAN_09961
1143	LOC662220	2.57997	3.03215e-06	TcasGA2_TC013658	uncharacterized LOC662220	; uncharacterized protein LOC662220|AUGUSTUS-3.0.2_13658|AUGUSTUS-3.0.2_13659|Circadian clock-controlled protein-like Protein|GLEAN_13658|GLEAN_13659|Protein takeout-like Protein
1144	LOC103314836	2.57961	2.75591e-05	CYP6BK5	probable cytochrome P450 6a23	; probable cytochrome P450 6a23|AUGUSTUS-3.0.2_10252|GLEAN_10252|cytochrome P450 6BK5
1145	LOC107398159	2.57824	0	TcasGA2_TC009273	uncharacterized LOC107398159	; uncharacterized protein LOC107398159|AUGUSTUS-3.0.2_09273
1146	LOC100142215	2.57794	2.00155e-07	TcasGA2_TC003596	suppressor of cytokine signaling 5	; suppressor of cytokine signaling 5|AUGUSTUS-3.0.2_34593|GLEAN_03596|Suppressor of cytokine signaling 5-like protein
1147	Kni	2.57794	0.00632244	TcasGA2_TC003413	knirps	; knirps|AUGUSTUS-3.0.2_03413|GLEAN_03413
1148	LOC100141850	2.57642	0.000411683	TcasGA2_TC005923	probable low affinity copper uptake protein 2	; probable low affinity copper uptake protein 2|AUGUSTUS-3.0.2_05923|GLEAN_05923|copper transporter 5.1
1149	LOC656768	2.5741	1.67837e-10	TcasGA2_TC015378	alpha-tocopherol transfer protein-like	; alpha-tocopherol transfer protein-like|AUGUSTUS-3.0.2_15378|GLEAN_15378
1150	LOC100142163	2.57315	0.000188721	TcasGA2_TC000829, H18	proclotting enzyme	; proclotting enzyme|AUGUSTUS-3.0.2_00829|GLEAN_00829|serine protease H18
1151	LOC663117	2.57269	3.94682e-08	TcasGA2_TC002953, GLEAN_02953	cathepsin B precursor	; cathepsin B precursor|AUGUSTUS-3.0.2_02953
1152	LOC662454	2.57049	0.0402277	TcasGA2_TC005991	protein aveugle	; protein aveugle|AUGUSTUS-3.0.2_05991|GLEAN_05991|Protein aveugle-like Protein
1153	LOC656702	2.57025	0.0213738	TcasGA2_TC012416	protein flightless-1	; protein flightless-1|AUGUSTUS-3.0.2_12416|GLEAN_12416|Protein flightless-1-like Protein
1154	LOC660773	2.57001	0.000300757	TcasGA2_TC014520	uncharacterized LOC660773	; uncharacterized protein LOC660773|AUGUSTUS-3.0.2_14520|GLEAN_14520
1155	LOC659173	2.56948	2.15894e-05	TcasGA2_TC013609	AP-3 complex subunit beta-2	; AP-3 complex subunit beta-2|AP-3 complex subunit beta-2-like Protein|AUGUSTUS-3.0.2_13609|GLEAN_13609
1156	LOC657166	2.56847	0.00328022	TcasGA2_TC011061	innexin inx7	; LOW QUALITY PROTEIN: innexin inx7|AUGUSTUS-3.0.2_11061|GLEAN_11061|Innexin inx7-like Protein
1157	LOC663133	2.56626	0.00401151	TcasGA2_TC008987	ATP-dependent RNA helicase Ddx1	; ATP-dependent RNA helicase Ddx1|ATP-dependent RNA helicase Ddx1-like Protein|AUGUSTUS-3.0.2_08987|GLEAN_08987
1158	LOC655063	2.56569	0.0179356	TcasGA2_TC015440	protein FAM57A	; protein FAM57A|AUGUSTUS-3.0.2_15440|GLEAN_15440|Protein FAM57B-like Protein
1159	Rho1	2.56545	0.0119603	TcasGA2_TC009158	Ras-like GTP-binding protein Rho1	; Ras-like GTP-binding protein Rho1|ras-like GTP-binding protein Rho1|AUGUSTUS-3.0.2_09158|GLEAN_09158
1160	LOC659927	2.56377	0.0244726	TcasGA2_TC014921	protein mothers against dpp	; protein mothers against dpp|GLEAN_14921
1161	LOC660089	2.56343	0	TcasGA2_TC004777	carnitine O-palmitoyltransferase 2, mitochondrial	; carnitine O-palmitoyltransferase 2, mitochondrial|AUGUSTUS-3.0.2_04777|Carnitine O-palmitoyltransferase 2, mitochondrial-like Protein|GLEAN_04777
1162	LOC663388	2.56152	0.0418681	TcasGA2_TC005734	uncharacterized LOC663388	; uncharacterized protein LOC663388|AUGUSTUS-3.0.2_05734|GLEAN_05734
1163	LOC656961	2.56019	0.031534	TcasGA2_TC005572, Tak1	TGF-beta activated kinase 1	; mitogen-activated protein kinase kinase kinase 7|AUGUSTUS-3.0.2_05572|GLEAN_05572
1164	LOC659549	2.55976	8.36994e-05	TcasGA2_TC015955	hematological and neurological expressed 1 protein	; hematological and neurological expressed 1 protein|AUGUSTUS-3.0.2_15955|GLEAN_15955
1165	LOC103313555	2.55967	0.0435912		uncharacterized LOC103313555
1166	LOC663194	2.55956	0.0146549	TcasGA2_TC000388	cyclic AMP-dependent transcription factor ATF-6 beta	; cyclic AMP-dependent transcription factor ATF-6 beta|AUGUSTUS-3.0.2_00388|Cyclic AMP-dependent transcription factor ATF-6 beta-like Protein|GLEAN_00388
1167	LOC664568	2.55889	0.0227569	TcasGA2_TC008224	liprin-beta-1	; liprin-beta-1|liprin-beta-2|AUGUSTUS-3.0.2_32855|GLEAN_08224|GLEAN_08225
1168	LOC658917	2.55818	0.00769534	TcasGA2_TC004842	delta-1-pyrroline-5-carboxylate synthase	; delta-1-pyrroline-5-carboxylate synthase|AUGUSTUS-3.0.2_04842|Delta-1-pyrroline-5-carboxylate synthase-like Protein|GLEAN_04842
1169	LOC662824	2.55807	0.00104281	TcasGA2_TC030683	reticulon-4-interacting protein 1 homolog, mitochondrial	; reticulon-4-interacting protein 1 homolog, mitochondrial|AUGUSTUS-3.0.2_30683|GLEAN_08918-OG23292|Reticulon-4-interacting protein 1, mitochondrial-like Protein
1170	LOC661953	2.55781	0.000458628	TcasGA2_TC030776	ubiquitin-conjugating enzyme E2 Q2	; ubiquitin-conjugating enzyme E2 Q2|AUGUSTUS-3.0.2_30776|GLEAN_00386-OG9014|Ubiquitin-conjugating enzyme E2Q-like protein CG4502
1171	LOC661504	2.55674	0.0100072	TcasGA2_TC013507	hemocyte protein-glutamine gamma-glutamyltransferase	; hemocyte protein-glutamine gamma-glutamyltransferase|similar to Protein-glutamine gamma-glutamyltransferase K (Transglutaminase K) (TGase K) (TGK) (TG(K)) (Transglutaminase-1) (Epidermal TGase)|GLEAN_13507
1172	LOC103314131	2.55508	0.0209214	TcasGA2_TC006765	uncharacterized LOC103314131	; uncharacterized protein LOC103314131|AUGUSTUS-3.0.2_06765|GLEAN_06765
1173	LOC100142289	2.55455	9.20393e-06	TcasGA2_TC013171	uncharacterized MFS-type transporter C09D4.1	; uncharacterized MFS-type transporter C09D4.1|GLEAN_13171
1174	LOC655313	2.55436	0.000725436	Sema-5c	semaphorin-5A	; semaphorin-5A|AUGUSTUS-3.0.2_01449|GLEAN_01449|semaphorin-5c
1175	LOC662329	2.55215	1.51949e-09	TcasGA2_TC007700	tubulin-specific chaperone cofactor E-like protein	; tubulin-specific chaperone cofactor E-like protein|AUGUSTUS-3.0.2_07700|GLEAN_07700
1176	LOC660443	2.55113	2.95319e-14	TcasGA2_TC012677	ADP-ribosylation factor-like protein 8	; ADP-ribosylation factor-like protein 8|AUGUSTUS-3.0.2_12677|GLEAN_12677
1177	Sirc	2.5494	0.000658387	TcasGA2_TC015033	Sid-1-related C	; Sid-1-related C|AUGUSTUS-3.0.2_15033|GLEAN_15033|SID1 transmembrane family member 1-like Protein
1178	LOC659638	2.54862	0.0137789	TcasGA2_TC002649	zinc transporter ZIP11	; zinc transporter ZIP11|AUGUSTUS-3.0.2_02649|GLEAN_02649|Zinc transporter ZIP11-like Protein
1179	LOC658382	2.54851	0.0185051		uncharacterized LOC658382	; uncharacterized protein LOC658382|AUGUSTUS-3.0.2_02287|GLEAN_02287|transcriptional regulator DEF1
1180	LOC659564	2.54463	0.000164934	TcasGA2_TC011081	splicing factor 1	; splicing factor 1|AUGUSTUS-3.0.2_11081|GLEAN_11081|Splicing factor 1-like Protein
1181	LOC661942	2.54414	0.00775892	TcasGA2_TC005767	ubiquitin conjugation factor E4 B	; ubiquitin conjugation factor E4 B|AUGUSTUS-3.0.2_05767|GLEAN_05767|Ubiquitin conjugation factor E4 B-like Protein
1182	LOC103313779	2.54328	0.00378584	TcasGA2_TC006021	nuclear receptor corepressor 1	; LOW QUALITY PROTEIN: nuclear receptor corepressor 1|AUGUSTUS-3.0.2_31270|GLEAN_06021|GLEAN_06022
1183	LOC100142538	2.54325	2.27193e-05	TcasGA2_TC015314	titin	; titin|AUGUSTUS-3.0.2_15315|GLEAN_15314|GLEAN_15315
1184	LOC657676	2.54285	4.08165e-05	TcasGA2_TC001754	ceramide kinase	; ceramide kinase|similar to CG16708-PA, isoform A|AUGUSTUS-3.0.2_01754|Ceramide kinase-like Protein|GLEAN_01754
1185	LOC659731	2.54246	0.00115728	TcasGA2_TC009537	XK-related protein 7	; XK-related protein 7|AUGUSTUS-3.0.2_09537|GLEAN_09537
1186	LOC658234	2.54199	0.000669365	TcasGA2_TC001677	tripartite motif-containing protein 2	; tripartite motif-containing protein 2|AUGUSTUS-3.0.2_01677|GLEAN_01677|Tripartite motif-containing protein 2-like Protein
1187	LOC656519	2.54146	0.000242409	TcasGA2_TC031160	nuclear migration protein nudC	; nuclear migration protein nudC|AUGUSTUS-3.0.2_31160|Nuclear migration protein nudC-like Protein
1188	LOC659407	2.54074	0.0185171	TcasGA2_TC005403	glutaminyl-peptide cyclotransferase-like protein	; glutaminyl-peptide cyclotransferase|glutaminyl-peptide cyclotransferase-like protein|AUGUSTUS-3.0.2_34176|GLEAN_05403
1189	LOC658629	2.54015	0.000131143		excitatory amino acid transporter	; excitatory amino acid transporter|AUGUSTUS-3.0.2_10614|Excitatory amino acid transporter 2-like Protein|GLEAN_10614
1190	LOC659753	2.54002	0.0143092	TcasGA2_TC011549	protein FAM98A	; protein FAM98A|AUGUSTUS-3.0.2_11549|GLEAN_11549|Protein FAM98A-like Protein
1191	LOC663890	2.53964	7.97583e-05	TcasGA2_TC033552	serine/threonine-protein phosphatase 6 regulatory ankyrin repeat subunit B-like	; serine/threonine-protein phosphatase 6 regulatory ankyrin repeat subunit B-like|AUGUSTUS-3.0.2_33552|Tankyrase-like Protein
1192	LOC654855	2.53663	1.81248e-05	TcasGA2_TC000481	putative pre-mRNA-splicing factor ATP-dependent RNA helicase PRP1	; putative pre-mRNA-splicing factor ATP-dependent RNA helicase PRP1|similar to ATP-dependent RNA helicase|AUGUSTUS-3.0.2_00481|Dosage compensation regulator-like Protein|GLEAN_00481
1193	LOC103312892	2.53574	5.98894e-07	TcasGA2_TC013909	homeobox protein TGIF2LX	; homeobox protein TGIF2LX|AUGUSTUS-3.0.2_13909|GLEAN_13909
1194	LOC660307	2.53375	0.00447594	TcasGA2_TC033649	leucine-rich repeat-containing protein 15	; leucine-rich repeat-containing protein 15|AUGUSTUS-3.0.2_33649
1195	LOC657339	2.53353	0.00499125	TcasGA2_TC015382	acyl-CoA Delta(11) desaturase	; acyl-CoA Delta(11) desaturase|GLEAN_15382|fatty acid desaturase D2
1196	LOC660046	2.53331	0.00397775	TcasGA2_TC014636, Bub1	mitotic checkpoint serine/threonine-protein kinase BUB1 beta	; mitotic checkpoint serine/threonine-protein kinase BUB1 beta|GLEAN_14636|budding uninhibited by benzimidazoles 1
1197	LOC659910	2.53317	0.00776838	TcasGA2_TC003033	mitochondrial inner membrane protease ATP23 homolog	; mitochondrial inner membrane protease ATP23 homolog|AUGUSTUS-3.0.2_03033|GLEAN_03033|Mitochondrial inner membrane protease ATP23 homolog-like Protein
1198	LOC661973	2.53215	6.47564e-06	TcasGA2_TC014667	5'-AMP-activated protein kinase subunit gamma-2	; 5'-AMP-activated protein kinase subunit gamma-2|GLEAN_14667|GLEAN_14668
1199	LOC661501	2.52863	0.0103369	TcasGA2_TC007191	T-complex protein 11-like protein 1	; T-complex protein 11-like protein 1|AUGUSTUS-3.0.2_07191|GLEAN_07191
1200	LOC656783	2.5284	7.22444e-12	TcasGA2_TC006725	fatty-acid amide hydrolase 2	; fatty-acid amide hydrolase 2|AUGUSTUS-3.0.2_06725|Fatty-acid amide hydrolase 2-like Protein|GLEAN_06725
1201	LOC657265	2.52794	7.18652e-07	TcasGA2_TC014613	GTP-binding protein Rheb homolog	; GTP-binding protein Rheb homolog|GLEAN_14613
1202	LOC103314708	2.52764	6.70534e-05	TcasGA2_TC005008	formin-binding protein 4	; formin-binding protein 4|AUGUSTUS-3.0.2_05008|GLEAN_05008
1203	LOC662006	2.52316	0.00231873	TcasGA2_TC007180, dachsous, ds	protein dachsous	; LOW QUALITY PROTEIN: protein dachsous|AUGUSTUS-3.0.2_32877|AUGUSTUS-3.0.2_32879|GLEAN_07180|Protein dachsous-like Protein
1204	LOC659665	2.52301	0.00513797	TcasGA2_TC005802	GPI inositol-deacylase	; GPI inositol-deacylase|AUGUSTUS-3.0.2_05802|GLEAN_05802|GPI inositol-deacylase-like Protein
1205	LOC100141866	2.5212	0.000119173	TcasGA2_TC003616	protein tramtrack, alpha isoform	; protein tramtrack, alpha isoform|AUGUSTUS-3.0.2_32438|GLEAN_03616
1206	LOC663667	2.52068	0.00832573	TcasGA2_TC009315	uncharacterized LOC663667	; uncharacterized protein LOC663667|AUGUSTUS-3.0.2_09315|GLEAN_09315
1207	LOC664394	2.52013	0.00872759	TcasGA2_TC009994	DNA methyltransferase 1-associated protein 1	; DNA methyltransferase 1-associated protein 1|AUGUSTUS-3.0.2_09994|DNA methyltransferase 1-associated protein 1-like Protein|GLEAN_09994
1208	LOC658126	2.51891	5.33734e-06	TcasGA2_TC013217	mitochondrial coenzyme A transporter SLC25A42	; mitochondrial coenzyme A transporter SLC25A42|GLEAN_13217
1209	LOC658718	2.51847	1.33227e-15	TcasGA2_TC002505	uncharacterized LOC658718	; uncharacterized protein LOC658718|AUGUSTUS-3.0.2_02505|GLEAN_02505
1210	LOC656164	2.51759	4.83248e-07	TcasGA2_TC001209	fructose-1,6-bisphosphatase 1	; fructose-1,6-bisphosphatase 1|AUGUSTUS-3.0.2_01209|Fructose-1,6-bisphosphatase 1-like Protein|GLEAN_01209
1211	LOC655049	2.51246	0.000185985	TcasGA2_TC007846	rab proteins geranylgeranyltransferase component A 1	; rab proteins geranylgeranyltransferase component A 1|AUGUSTUS-3.0.2_07846|GLEAN_07846|Rab proteins geranylgeranyltransferase component A-like Protein
1212	LOC658219	2.51194	1.29261e-11	TcasGA2_TC006109	14-3-3 protein epsilon	; 14-3-3 protein epsilon|14-3-3 protein epsilon-like Protein|AUGUSTUS-3.0.2_06109|GLEAN_06109
1213	LOC662493	2.51129	0.00214874	TcasGA2_TC012166, Stk11, lkb1	polarization-related protein LKB1	; serine/threonine-protein kinase STK11|AUGUSTUS-3.0.2_12166|GLEAN_12166
1214	LOC103313698	2.51106	0.00775185		biogenesis of lysosome-related organelles complex 1 subunit 6	; biogenesis of lysosome-related organelles complex 1 subunit 6
1215	LOC103312186	2.5099	0.012237	TcasGA2_TC001382, bif	bifocal	; probable serine/threonine-protein kinase nek3|AUGUSTUS-3.0.2_01382|GLEAN_01382
1216	LOC655095	2.50888	0.0352779	TcasGA2_TC004631	HEAT repeat-containing protein 5B	; HEAT repeat-containing protein 5B|AUGUSTUS-3.0.2_04631|GLEAN_04631|HEAT repeat-containing protein 5B-like Protein
1217	Pub	2.50871	0.0039073	TcasGA2_TC009978	polyubiquitin	; polyubiquitin|AUGUSTUS-3.0.2_09978|GLEAN_09978|Polyubiquitin-like Protein
1218	LOC103315000	2.50859	2.29196e-08	TcasGA2_TC031552	uncharacterized LOC103315000	; uncharacterized protein LOC103315000|AUGUSTUS-3.0.2_31552
1219	LOC661460	2.50811	0.0132564	TcasGA2_TC014029	2',5'-phosphodiesterase 12	; 2',5'-phosphodiesterase 12|2',5'-phosphodiesterase 12-like Protein|AUGUSTUS-3.0.2_14029|GLEAN_14029
1220	LOC661231	2.50803	0.00901957	TcasGA2_TC034463	APOPT family protein CG14806, mitochondrial	; APOPT family protein CG14806, mitochondrial|APOPT family protein CG14806, mitochondrial-like Protein|AUGUSTUS-3.0.2_34463
1221	LOC661424	2.50464	0.00277819	TcasGA2_TC015063, bol, boule	deleted in azoospermia-like	; atrophin-1|deleted in azoospermia protein 2|deleted in azoospermia-like|AUGUSTUS-3.0.2_15063|GLEAN_15063
1222	LOC659003	2.50143	0.00493785	TcasGA2_TC003900	active breakpoint cluster region-related protein	; active breakpoint cluster region-related protein|AUGUSTUS-3.0.2_03900|Breakpoint cluster region protein-like Protein|GLEAN_03900
1223	LOC660103	2.50117	6.20536e-10	TcasGA2_TC007882	fasciclin-2	; fasciclin-2|AUGUSTUS-3.0.2_07882|GLEAN_07882|Tyrosine-protein phosphatase Lar-like Protein
1224	LOC658778	2.49999	2.04644e-05	TcasGA2_TC000323	uncharacterized LOC658778	; uncharacterized protein LOC658778|AUGUSTUS-3.0.2_00323|GLEAN_00323
1225	LOC657259	2.49959	0.00073092	TcasGA2_TC014093	alpha-tocopherol transfer protein-like	; alpha-tocopherol transfer protein-like|AUGUSTUS-3.0.2_14093|GLEAN_14093
1226	Dat	2.49943	0	TcasGA2_TC008204, Nat	dopamine N acetyltransferase	; dopamine N acetyltransferase|AUGUSTUS-3.0.2_08204|Dopamine N-acetyltransferase-like Protein|GLEAN_08204|N-acetyl transferase
1227	LOC659231	2.49922	7.63602e-05	TcasGA2_TC002993	ran GTPase-activating protein 1	; ran GTPase-activating protein 1|AUGUSTUS-3.0.2_02993|GLEAN_02993|Ran GTPase-activating protein-like Protein
1228	LOC659758	2.49905	0.00112288	TcasGA2_TC004781	ubiquilin-1	; ubiquilin-1|AUGUSTUS-3.0.2_04781|GLEAN_04781|Ubiquilin-1-like Protein
1229	LOC659265	2.49899	0.0237564	TcasGA2_TC012433	phosphoinositide 3-kinase regulatory subunit 4	; phosphoinositide 3-kinase regulatory subunit 4|AUGUSTUS-3.0.2_12433|GLEAN_12433|Phosphoinositide 3-kinase regulatory subunit 4-like Protein
1230	LOC103312195	2.49861	0.0393581	TcasGA2_TC001341	transient receptor potential cation channel protein painless	; transient receptor potential cation channel protein painless|GLEAN_01341
1231	LOC656272	2.4984	0.0240928	TcasGA2_TC015355	transmembrane protein 53	; transmembrane protein 53|AUGUSTUS-3.0.2_15355|GLEAN_15355|Transmembrane protein 53-like Protein
1232	LOC661691	2.49806	0.0028477	TcasGA2_TC006139	multiple inositol polyphosphate phosphatase 1	; multiple inositol polyphosphate phosphatase 1|AUGUSTUS-3.0.2_06139|GLEAN_06139
1233	LOC657565	2.49656	0.012164	TcasGA2_TC008521	alpha-(1,6)-fucosyltransferase	; alpha-(1,6)-fucosyltransferase|AUGUSTUS-3.0.2_08521|Alpha-(1,6)-fucosyltransferase-like Protein|GLEAN_08521
1234	LOC656930	2.49647	0.0131657	TcasGA2_TC007754	ubiquitin-60S ribosomal protein L40	; ubiquitin-60S ribosomal protein L40|AUGUSTUS-3.0.2_07754|GLEAN_07754|Ubiquitin-60S ribosomal protein L40-like Protein
1235	LOC663888	2.49571	2.73283e-05	TcasGA2_TC014725	prolactin regulatory element-binding protein	; prolactin regulatory element-binding protein|GLEAN_14725
1236	LOC107397768	2.4952	0.00360963		uncharacterized LOC107397768
1237	LOC659396	2.49314	0.0095046	TcasGA2_TC010123	unc-112-related protein	; unc-112-related protein|AUGUSTUS-3.0.2_10123|GLEAN_10123|Unc-112-related protein-like Protein
1238	LOC658296	2.4926	0.00129697	TcasGA2_TC006210	probable ATP-dependent RNA helicase DDX47	; probable ATP-dependent RNA helicase DDX47|AUGUSTUS-3.0.2_06210|GLEAN_06210|putative ATP-dependent RNA helicase Dbp45A-like Protein
1239	LOC658487	2.49108	0.00317299	TcasGA2_TC000326	zinc finger protein GLIS2 homolog	; zinc finger protein GLIS2 homolog|AUGUSTUS-3.0.2_00326|GLEAN_00326|Zinc finger protein GLIS2 homolog-like Protein
1240	LOC658266	2.48939	0.0226859	TcasGA2_TC000974	protein NRDE2 homolog	; protein NRDE2 homolog|AUGUSTUS-3.0.2_00974|GLEAN_00974|Protein NRDE2 homolog-like Protein
1241	LOC659811	2.48919	0.0155104	TcasGA2_TC012667	sterile alpha and TIR motif-containing protein 1	; sterile alpha and TIR motif-containing protein 1|AUGUSTUS-3.0.2_34427|GLEAN_12667|GLEAN_12668|Sterile alpha and TIR motif-containing protein 1-like Protein
1242	LOC661636	2.4889	2.04404e-05	TcasGA2_TC014298	ubiquitin-conjugating enzyme E2Q-like protein CG4502	; ubiquitin-conjugating enzyme E2Q-like protein CG4502|GLEAN_14298
1243	LOC662428	2.48852	2.0529e-06	TcasGA2_TC000726	fibroin heavy chain	; fibroin heavy chain|AUGUSTUS-3.0.2_00726|GLEAN_00726|chorion protein S38
1244	LOC663266	2.4877	3.33866e-05	TcasGA2_TC007809	tyrosine-protein kinase Btk29A	; tyrosine-protein kinase Btk29A|AUGUSTUS-3.0.2_07809|GLEAN_07809|Tyrosine-protein kinase Btk29A-like Protein
1245	LOC662941	2.48613	2.87071e-08	TcasGA2_TC009481	stromal membrane-associated protein 1	; stromal membrane-associated protein 1|AUGUSTUS-3.0.2_09481|GLEAN_09481|Stromal membrane-associated protein 1-like Protein
1246	LOC655269	2.48514	0.0206286	TcasGA2_TC007849	sortilin-related receptor	; sortilin-related receptor|AUGUSTUS-3.0.2_07849|GLEAN_07849|Sortilin-related receptor-like Protein
1247	LOC100142618	2.48332	0.00673085	TcasGA2_TC015310	lachesin	; lachesin|AUGUSTUS-3.0.2_15310|GLEAN_15310|Lachesin-like Protein
1248	LOC657465	2.48311	2.80376e-11	TcasGA2_TC004556	heterogeneous nuclear ribonucleoprotein A1, A2/B1 homolog	; heterogeneous nuclear ribonucleoprotein A1, A2/B1 homolog|AUGUSTUS-3.0.2_04556|GLEAN_04556|Heterogeneous nuclear ribonucleoprotein 87F-like Protein
1249	LOC657295	2.48256	0.0377643	TcasGA2_TC010975	uncharacterized LOC657295	; uncharacterized protein LOC657295|AUGUSTUS-3.0.2_31230|GLEAN_10975|GLEAN_10976
1250	LOC659614	2.48224	0.0259941	TcasGA2_TC015956	evolutionarily conserved signaling intermediate in Toll pathway, mitochondrial	; evolutionarily conserved signaling intermediate in Toll pathway, mitochondrial|AUGUSTUS-3.0.2_15956|Evolutionarily conserved signaling intermediate in Toll pathway, mitochondrial-like Protein|GLEAN_15956
1251	LOC660637	2.48183	6.0496e-08	TcasGA2_TC000144	actin-related protein 2	; actin-related protein 2|AUGUSTUS-3.0.2_00144|Actin-related protein 2-like Protein|GLEAN_00144
1252	Ptl	2.48162	0.0148016	TcasGA2_TC000912, Antp	prothoraxless	; prothoraxless|AUGUSTUS-3.0.2_00912|GLEAN_00912|antennapedia|antp ortholog
1253	LOC656551	2.4803	0.000923326	TcasGA2_TC002121	WD repeat-containing protein 13	; WD repeat-containing protein 13|AUGUSTUS-3.0.2_32604|GLEAN_02121|Protein will die slowly-like Protein
1254	LOC655335	2.48006	4.30187e-05	TcasGA2_TC011448	uncharacterized LOC655335	; uncharacterized protein LOC655335|AUGUSTUS-3.0.2_11448|AUGUSTUS-3.0.2_11450|GLEAN_11448|GLEAN_11450|Organic cation transporter protein-like Protein|Ubiquinol-cytochrome-c reductase complex assembly factor 1-like Protein
1255	LOC103312899	2.47926	0.0135402	TcasGA2_TC013943	hypothetical protein	; uncharacterized protein LOC103312899|AUGUSTUS-3.0.2_13943|GLEAN_13943
1256	LOC658095	2.47658	0.0169218	TcasGA2_TC004763	uncharacterized protein C45G9.7	; uncharacterized protein C45G9.7|AUGUSTUS-3.0.2_04763|GLEAN_04763
1257	LOC100142346	2.4765	0.0179207	TcasGA2_TC002816	membrane-bound transcription factor site-1 protease	; membrane-bound transcription factor site-1 protease|AUGUSTUS-3.0.2_02816|GLEAN_02816|Membrane-bound transcription factor site-1 protease-like Protein
1258	LOC103312115	2.47585	0.00119028	TcasGA2_TC031140	insulin-like growth factor 2 mRNA-binding protein 1	; insulin-like growth factor 2 mRNA-binding protein 1|AUGUSTUS-3.0.2_31140|AUGUSTUS-3.0.2_33063|insulin-like growth factor 2 mRNA-binding protein 3-A
1259	LOC661759	2.47533	0.0298836	TcasGA2_TC014034	sodium bicarbonate cotransporter 3	; sodium bicarbonate cotransporter 3|AUGUSTUS-3.0.2_33053|AUGUSTUS-3.0.2_33054|GLEAN_14034|GLEAN_14036-OG1709|Sodium-driven chloride bicarbonate exchanger-like Protein
1260	LOC655745	2.47526	0	TcasGA2_TC000474	D-beta-hydroxybutyrate dehydrogenase, mitochondrial	; D-beta-hydroxybutyrate dehydrogenase, mitochondrial|AUGUSTUS-3.0.2_00474|D-beta-hydroxybutyrate dehydrogenase, mitochondrial-like Protein|GLEAN_00474
1261	LOC660296	2.47273	0.000724783	TcasGA2_TC014379	multidrug resistance-associated protein 4	; multidrug resistance-associated protein 4|GLEAN_14379
1262	LOC103312271	2.4719	0.0228918	TcasGA2_TC004705	hypothetical protein	; uncharacterized protein LOC103312271|AUGUSTUS-3.0.2_04705|GLEAN_04705
1263	LOC103313200	2.47179	2.37319e-09	TcasGA2_TC014767	serine/threonine-protein kinase 26	; serine/threonine-protein kinase 26|GLEAN_14767|serine/threonine-protein kinase MST4
1264	LOC656738	2.47151	0.0363557	TcasGA2_TC011021	exocyst complex component 6	; exocyst complex component 6|AUGUSTUS-3.0.2_11021|Exocyst complex component 6-like Protein|GLEAN_11021
1265	LOC661853	2.47015	0	TcasGA2_TC009086	E3 ubiquitin-protein ligase AMFR	; E3 ubiquitin-protein ligase AMFR|AUGUSTUS-3.0.2_09086|E3 ubiquitin-protein ligase AMFR-like Protein|GLEAN_09086
1266	Nag3	2.46779	0.0234482	TcasGA2_TC001116	beta-N-acetylglucosaminidase NAG3	; beta-N-acetylglucosaminidase NAG3|AUGUSTUS-3.0.2_01116|GLEAN_01116|putative beta-hexosaminidase fdl-like Protein
1267	LOC661686	2.46647	0.00905125	TcasGA2_TC033431	nuclear speckle splicing regulatory protein 1	; nuclear speckle splicing regulatory protein 1|AUGUSTUS-3.0.2_33431|Nuclear speckle splicing regulatory protein 1-like Protein
1268	LOC103312187	2.46567	5.48027e-06	TcasGA2_TC000158	polynucleotide 5'-hydroxyl-kinase NOL9	; polynucleotide 5'-hydroxyl-kinase NOL9|AUGUSTUS-3.0.2_00158|GLEAN_00158|Polynucleotide 5'-hydroxyl-kinase NOL9-like Protein
1269	LOC655694	2.46466	0.000442101	TcasGA2_TC009590	tubulin beta chain	; tubulin beta chain|AUGUSTUS-3.0.2_34766|GLEAN_09590|Tubulin beta-3 chain-like protein
1270	LOC662336	2.46145	0.0456147		trifunctional enzyme subunit alpha, mitochondrial	; trifunctional enzyme subunit alpha, mitochondrial
1271	LOC663671	2.46075	0	TcasGA2_TC012731	MICOS complex subunit Mic60	; MICOS complex subunit Mic60|AUGUSTUS-3.0.2_12731|GLEAN_12731|Putative mitochondrial inner membrane protein-like Protein|putative mitochondrial inner membrane protein
1272	LOC661589	2.46058	8.14016e-13	TcasGA2_TC013767	lysosome-associated membrane glycoprotein 1	; lysosome-associated membrane glycoprotein 1|GLEAN_13767
1273	LOC656455	2.45802	0.0238929	TcasGA2_TC006723	uncharacterized LOC656455	; uncharacterized protein LOC656455|AUGUSTUS-3.0.2_06723|GLEAN_06723
1274	LOC661548	2.45452	0.0468986	TcasGA2_TC013151	pre-mRNA-splicing factor CWC25 homolog	; pre-mRNA-splicing factor CWC25 homolog|GLEAN_13151
1275	LOC656637	2.45377	0.000594924	TcasGA2_TC010667, Msp-300	nesprin-1	; nesprin-1|AUGUSTUS-3.0.2_34349|AUGUSTUS-3.0.2_34350|AUGUSTUS-3.0.2_34351|GLEAN_10667|GLEAN_10669|muscle-specific protein 300
1276	LOC660768	2.45317	5.41243e-05	TcasGA2_TC013835	glucose-induced degradation protein 8 homolog	; glucose-induced degradation protein 8 homolog|AUGUSTUS-3.0.2_13835|GLEAN_13835|Glucose-induced degradation protein 8 homolog-like Protein
1277	LOC655722	2.45253	2.58373e-06		DNA mismatch repair protein Msh2	; DNA mismatch repair protein Msh2|DNA mismatch repair protein spellchecker 1-like Protein|GLEAN_02071
1278	LOC661588	2.45206	0.0132395	TcasGA2_TC008439	arylsulfatase B	; arylsulfatase B|AUGUSTUS-3.0.2_08439|Arylsulfatase J-like Protein|GLEAN_08439
1279	LOC663984	2.45146	0.0409891	TcasGA2_TC014468, Su(H)	suppressor of hairless	; suppressor of hairless protein|GLEAN_14468
1280	LOC662551	2.45127	0	TcasGA2_TC008661	myosin-2 essential light chain	; myosin-2 essential light chain|AUGUSTUS-3.0.2_08661|GLEAN_08661|Myosin-2 essential light chain-like Protein
1281	LOC663167	2.45048	1.02903e-05	TcasGA2_TC000835	myelin expression factor 2	; myelin expression factor 2|AUGUSTUS-3.0.2_00835|GLEAN_00835
1282	LOC661052	2.44975	1.37128e-05	TcasGA2_TC015408	mevalonate kinase	; mevalonate kinase|AUGUSTUS-3.0.2_15408|GLEAN_15408|Mevalonate kinase-like Protein
1283	LOC662131	2.44777	0.0146961	TcasGA2_TC006154	toll-like receptor 2	; toll-like receptor 2|AUGUSTUS-3.0.2_33974|GLEAN_06154
1284	LOC662125	2.44727	0.00989796	TcasGA2_TC015733	uncharacterized LOC662125	; uncharacterized protein LOC662125|AUGUSTUS-3.0.2_15733|GLEAN_15733
1285	LOC660902	2.44667	0.0247063	TcasGA2_TC011677	23 kDa integral membrane protein	; 23 kDa integral membrane protein|AUGUSTUS-3.0.2_11677|GLEAN_11677|Tetraspanin-6-like Protein
1286	LOC656383	2.44562	0.0374598	TcasGA2_TC005009	PHD and RING finger domain-containing protein 1	; PHD and RING finger domain-containing protein 1|AUGUSTUS-3.0.2_05009|GLEAN_05009
1287	LOC661306	2.44485	0.000342449	TcasGA2_TC004583	rho GTPase-activating protein 190	; rho GTPase-activating protein 190|AUGUSTUS-3.0.2_04583|GLEAN_04583|Rho GTPase-activating protein 190-like Protein
1288	LOC663504	2.44426	0.00553869	TcasGA2_TC000375	pre-mRNA-splicing factor Slu7	; pre-mRNA-splicing factor Slu7|AUGUSTUS-3.0.2_00375|GLEAN_00375|Pre-mRNA-splicing factor Slu7-like Protein
1289	LOC660029	2.4442	0.013584	TcasGA2_TC000591	methyl-CpG-binding domain protein 5	; methyl-CpG-binding domain protein 5|AUGUSTUS-3.0.2_00591|GLEAN_00591
1290	LOC657150	2.44409	0.00764861		tRNA (guanine(37)-N1)-methyltransferase	; tRNA (guanine(37)-N1)-methyltransferase|AUGUSTUS-3.0.2_11563|GLEAN_11563|tRNA (guanine(37)-N1)-methyltransferase-like Protein
1291	LOC655345	2.44405	0.0363938	TcasGA2_TC003713	epimerase family protein SDR39U1	; epimerase family protein SDR39U1|AUGUSTUS-3.0.2_03713|Epimerase family protein SDR39U1-like Protein|GLEAN_03713
1292	LOC663876	2.4437	0.0358198	TcasGA2_TC008107	WD repeat-containing protein 48 homolog	; WD repeat-containing protein 48 homolog|AUGUSTUS-3.0.2_08107|GLEAN_08107|WD repeat-containing protein 48 homolog-like Protein
1293	LOC662204	2.44069	0.000399484	TcasGA2_TC006773	zinc finger CCHC domain-containing protein 24	; zinc finger CCHC domain-containing protein 24|AUGUSTUS-3.0.2_06773|GLEAN_06773|Zinc finger CCHC domain-containing protein 24-like Protein
1294	LOC658963	2.43942	0.0159868	TcasGA2_TC011979	mediator of RNA polymerase II transcription subunit 19	; mediator of RNA polymerase II transcription subunit 19|AUGUSTUS-3.0.2_11979|GLEAN_11979|Mediator of RNA polymerase II transcription subunit 19-like Protein
1295	LOC658221	2.43941	0.000904569	TcasGA2_TC006332	alkyldihydroxyacetonephosphate synthase	; alkyldihydroxyacetonephosphate synthase|AUGUSTUS-3.0.2_06332|Alkyldihydroxyacetonephosphate synthase-like Protein|GLEAN_06332
1296	LOC103315223	2.43894	0.000200595	TcasGA2_TC015535	putative mediator of RNA polymerase II transcription subunit 26	; putative mediator of RNA polymerase II transcription subunit 26|uncharacterized protein LOC103315223|AUGUSTUS-3.0.2_15535|GLEAN_15535
1297	LOC654903	2.43853	0.000591133	TcasGA2_TC001725, TNPO1	transportin-1	; transportin-1|AUGUSTUS-3.0.2_01725|GLEAN_01725|Importin subunit beta-like Protein
1298	LOC663784	2.43584	0.0221707	TcasGA2_TC002934	rap1 GTPase-GDP dissociation stimulator 1-B	; rap1 GTPase-GDP dissociation stimulator 1-B|AUGUSTUS-3.0.2_02934|GLEAN_02934|Rap1 GTPase-GDP dissociation stimulator 1-B-like Protein
1299	LOC657203	2.43538	0.000745757	TcasGA2_TC005953	cathepsin B precursor	; cathepsin B-like cysteine proteinase 4|AUGUSTUS-3.0.2_05953|GLEAN_05953
1300	LOC660207	2.43538	0.036095	TcasGA2_TC011508	contactin-associated protein-like 3	; contactin-associated protein-like 3|AUGUSTUS-3.0.2_11508|GLEAN_11508
1301	LOC657518	2.43504	4.02367e-11	TcasGA2_TC011708	transcription initiation factor IIA subunit 1	; transcription initiation factor IIA subunit 1|AUGUSTUS-3.0.2_11708|GLEAN_11708
1302	LOC661817	2.43278	2.11845e-05	TcasGA2_TC012867	serine-arginine protein 55	; serine-arginine protein 55|tRNA pseudouridine synthase-like 1|AUGUSTUS-3.0.2_12867|AUGUSTUS-3.0.2_12868|GLEAN_12867|Serine-arginine protein 55-like Protein
1303	LOC659235	2.43239	0.0056965	TcasGA2_TC003865	alpha-tocopherol transfer protein-like	; alpha-tocopherol transfer protein-like|AUGUSTUS-3.0.2_31061|GLEAN_03865|Retinaldehyde-binding protein 1-like Protein
1304	LOC660438	2.43181	0.000934511	TcasGA2_TC005396	dynein assembly factor 5, axonemal	; dynein assembly factor 5, axonemal|AUGUSTUS-3.0.2_05396|GLEAN_05396|HEAT repeat-containing protein 2|HEAT repeat-containing protein 2-like Protein
1305	LOC103313624	2.4313	0.0494644	TcasGA2_TC033693	probable ATP-dependent RNA helicase DDX43	; probable ATP-dependent RNA helicase DDX43|ATP-dependent RNA helicase p62-like Protein|AUGUSTUS-3.0.2_33693
1306	LOC657856	2.43106	7.92774e-05	TcasGA2_TC001634	nicotinate phosphoribosyltransferase	; nicotinate phosphoribosyltransferase|AUGUSTUS-3.0.2_01634|GLEAN_01634|Nicotinate phosphoribosyltransferase-like Protein
1307	LOC103313855	2.4304	0.00203472		protein kinase C-like	; LOW QUALITY PROTEIN: protein kinase C-like
1308	LOC100141922	2.43022	0.0210084	TcasGA2_TC007650	putative protein arginine N-methyltransferase 9	; putative protein arginine N-methyltransferase 9|AUGUSTUS-3.0.2_07650|GLEAN_07650|Putative protein arginine N-methyltransferase 9-like Protein
1309	LOC103312673	2.43014	0.0363502		hypothetical protein	; uncharacterized protein LOC103312673|GLEAN_01394
1310	Ubx	2.42983	0.00133019	TcasGA2_TC000903, Utx	ultrabithorax	; ultrabithorax|AUGUSTUS-3.0.2_00903|GLEAN_00903|Hox transcription factor|ultrathorax
1311	LOC657376	2.42977	0.0113906		uncharacterized LOC657376	; uncharacterized protein LOC657376|AUGUSTUS-3.0.2_04066|GLEAN_04066
1312	LOC655896	2.429	1.44796e-07	TcasGA2_TC015979	aldehyde dehydrogenase, dimeric NADP-preferring	; aldehyde dehydrogenase, dimeric NADP-preferring|AUGUSTUS-3.0.2_15979|Aldehyde dehydrogenase family 3 member B1-like Protein|GLEAN_15979
1313	LOC100141660	2.42893	0.00959651	TcasGA2_TC012116	ADP-ribosylation factor-related protein 1	; ADP-ribosylation factor-related protein 1|ADP-ribosylation factor 1-like Protein|AUGUSTUS-3.0.2_12116|GLEAN_12116
1314	LOC657895	2.42831	5.34057e-08	TcasGA2_TC009383	CREB-regulated transcription coactivator 1	; CREB-regulated transcription coactivator 1|AUGUSTUS-3.0.2_09383|CREB-regulated transcription coactivator 1-like Protein|GLEAN_09383
1315	LOC664300	2.42507	2.15439e-08	TcasGA2_TC007106	glycosyltransferase-like protein LARGE2	; glycosyltransferase-like protein LARGE2|AUGUSTUS-3.0.2_07106|GLEAN_07106
1316	LOC656947	2.42462	0	TcasGA2_TC014946	scavenger receptor class B member 1	; scavenger receptor class B member 1|AUGUSTUS-3.0.2_33435|GLEAN_14946|Protein croquemort-like Protein
1317	LOC657773	2.42303	0.00365702	TcasGA2_TC013029	neprilysin-11	; neprilysin-11|GLEAN_13029|GLEAN_13030
1318	LOC658131	2.42139	0.0356462	TcasGA2_TC015690	DNA ligase 1	; DNA ligase 1|AUGUSTUS-3.0.2_15690|GLEAN_15690
1319	LOC103312157	2.42139	0.00010544	TcasGA2_TC035042	uncharacterized LOC103312157	; uncharacterized protein LOC103312157|AUGUSTUS-3.0.2_35042|GLEAN_10740
1320	LOC660934	2.42101	0.00389385	TcasGA2_TC015324	uncharacterized LOC660934	; uncharacterized protein LOC660934|AUGUSTUS-3.0.2_15324|GLEAN_15324
1321	LOC655393	2.42096	0.00181735	TcasGA2_TC002131, Mtor, Tpr, megator	nucleoprotein TPR	; nucleoprotein TPR|AUGUSTUS-3.0.2_02131|GLEAN_02131
1322	LOC660122	2.4209	0.0115572	TcasGA2_TC009191	protein transport protein Sec23A	; protein transport protein Sec23A|AUGUSTUS-3.0.2_09191|GLEAN_09191|Protein transport protein Sec23A-like Protein
1323	LOC659951	2.42071	0.00305387		DENN domain-containing protein 1B	; DENN domain-containing protein 1A|DENN domain-containing protein 1B|AUGUSTUS-3.0.2_06851|DENN domain-containing protein 1A-like Protein|GLEAN_06851
1324	LOC661263	2.41903	0.0422546	TcasGA2_TC015308	codanin-1	; codanin-1|AUGUSTUS-3.0.2_15308|GLEAN_15308|Protein disks lost-like Protein
1325	LOC662210	2.41778	0.000149079	TcasGA2_TC009648	luciferin 4-monooxygenase	; luciferin 4-monooxygenase|AUGUSTUS-3.0.2_09648|GLEAN_09648|Luciferin 4-monooxygenase-like Protein
1326	LOC103315145	2.41774	0.0124234	TcasGA2_TC000769	uncharacterized LOC103315145	; uncharacterized protein LOC103315145|AUGUSTUS-3.0.2_32037|GLEAN_00769|Tudor domain-containing protein 7-like Protein
1327	LOC657704	2.41764	0.0112193	TcasGA2_TC011056	tubulin-specific chaperone D	; tubulin-specific chaperone D|AUGUSTUS-3.0.2_11056|GLEAN_11056|Tubulin-specific chaperone D-like Protein
1328	LOC664271	2.41698	0.0240654	TcasGA2_TC007370, ilr2	insulin-like receptor	; insulin-like receptor|AUGUSTUS-3.0.2_07370|GLEAN_07370|insulin like receptor 2|insulin-like growth factor receptor
1329	LOC659499	2.41695	0.00160091	TcasGA2_TC011191, ird, ird4, rel	relish	; nuclear factor NF-kappa-B p110 subunit|AUGUSTUS-3.0.2_11191|GLEAN_11191
1330	LOC664289	2.41555	0.000563909	TcasGA2_TC008851	uncharacterized LOC664289	; uncharacterized protein LOC664289|AUGUSTUS-3.0.2_31207|GLEAN_08851|GLEAN_08852|GLEAN_08853
1331	LOC656004	2.41413	0.00777012	TcasGA2_TC003826	28S ribosomal protein S29, mitochondrial	; 28S ribosomal protein S29, mitochondrial|28S ribosomal protein S29, mitochondrial-like Protein|AUGUSTUS-3.0.2_03826|GLEAN_03826
1332	LOC657767	2.41131	0.00233707	TcasGA2_TC034515	host cell factor 2	; host cell factor 2|AUGUSTUS-3.0.2_34515|Host cell factor-like protein
1333	Ppp2r1a	2.41069	0.00126299	TcasGA2_TC012508	protein phosphatase 2, regulatory subunit A, alpha isoform	; protein phosphatase 2, regulatory subunit A, alpha isoform|Serine/threonine-protein phosphatase PP2A 65 kDa regulatory subunit-like Protein
1334	LOC662982	2.40996	5.09224e-06	TcasGA2_TC000392	synaptic vesicle glycoprotein 2B	; synaptic vesicle glycoprotein 2B|AUGUSTUS-3.0.2_00393|GLEAN_00392|GLEAN_00393|Synaptic vesicle glycoprotein 2B-like Protein
1335	LOC662109	2.40938	9.17501e-05	TcasGA2_TC000192	regulator of nonsense transcripts 1 homolog	; regulator of nonsense transcripts 1 homolog|AUGUSTUS-3.0.2_00192|GLEAN_00192|Regulator of nonsense transcripts 1 homolog-like Protein
1336	LOC660350	2.40863	2.91684e-08	TcasGA2_TC007467	ATP-binding cassette sub-family G member 1	; ATP-binding cassette sub-family G member 1|AUGUSTUS-3.0.2_07467|GLEAN_07467|Protein white-like Protein
1337	LOC657129	2.4084	0.0418508	TcasGA2_TC001747	WASH complex subunit 7	; WASH complex subunit 7|GLEAN_01747
1338	LOC662618	2.40796	0	TcasGA2_TC006252, nuoG	NADH-ubiquinone oxidoreductase 75 kDa subunit, mitochondrial	; NADH-ubiquinone oxidoreductase 75 kDa subunit, mitochondrial|AUGUSTUS-3.0.2_06252|GLEAN_06252|NADH-ubiquinone oxidoreductase 75 kDa subunit, mitochondrial-like Protein
1339	LOC661560	2.40752	0.039979	TcasGA2_TC033706	eukaryotic translation elongation factor 1 epsilon-1	; eukaryotic translation elongation factor 1 epsilon-1|AUGUSTUS-3.0.2_33706|Eukaryotic translation elongation factor 1 epsilon-1-like Protein
1340	LOC663952	2.40565	0.0360206	TcasGA2_TC005310	H(+)/Cl(-) exchange transporter 7	; H(+)/Cl(-) exchange transporter 7|AUGUSTUS-3.0.2_05310|Chloride channel protein 2-like Protein|GLEAN_05310
1341	LOC659054	2.40551	0.022724	CYP345B1	cytochrome P450 345B1	; cytochrome P450 6k1|AUGUSTUS-3.0.2_00151|GLEAN_00151
1342	LOC661976	2.4037	0.0220403	TcasGA2_TC015650	TBC1 domain family member 10A	; TBC1 domain family member 10A|AUGUSTUS-3.0.2_15650|Ecotropic viral integration site 5 ortholog-like Protein|GLEAN_15650
1343	LOC661462	2.4033	4.26734e-05	TcasGA2_TC013508	annulin	; annulin|GLEAN_13508
1344	LOC100141629	2.40325	1.42109e-13	TcasGA2_TC001171	DDRGK domain-containing protein 1	; DDRGK domain-containing protein 1|AUGUSTUS-3.0.2_01171|GLEAN_01171
1345	LOC657364	2.40317	0.0183929	TcasGA2_TC012779	protein FAM107B	; protein FAM107B|AUGUSTUS-3.0.2_12779|GLEAN_12779
1346	LOC103314370	2.40292	0.0136943	TcasGA2_TC012858	lys-63-specific deubiquitinase BRCC36	; lys-63-specific deubiquitinase BRCC36|AUGUSTUS-3.0.2_12858|GLEAN_12858|Lys-63-specific deubiquitinase BRCC36-like Protein
1347	LOC661305	2.40273	7.64246e-06	TcasGA2_TC004633	E3 ubiquitin-protein ligase KCMF1	; E3 ubiquitin-protein ligase KCMF1|AUGUSTUS-3.0.2_04633|E3 ubiquitin-protein ligase KCMF1-like Protein|GLEAN_04633
1348	LOC662035	2.4016	4.29523e-12	TcasGA2_TC000810	putative DNA helicase INO80	; putative DNA helicase INO80|AUGUSTUS-3.0.2_00810|GLEAN_00810|probable GPI-anchored adhesin-like protein PGA55
1349	LOC662256	2.39882	1.42023e-10	TcasGA2_TC013567	uncharacterized LOC662256	; uncharacterized protein LOC662256|AUGUSTUS-3.0.2_13567|GLEAN_13567
1350	LOC663441	2.39767	3.08859e-06	TcasGA2_TC015524	cullin-2	; cullin-2|AUGUSTUS-3.0.2_15524|Cullin homolog 1-like Protein|GLEAN_15524
1351	LOC662614	2.39746	0.0110147	TcasGA2_TC009643	spermine oxidase	; spermine oxidase|AUGUSTUS-3.0.2_09643|GLEAN_09643|Protein anon-37Cs-like Protein
1352	Tcjheh-r5	2.3952	0.00309395	TcasGA2_TC003436	juvenile hormone epoxide hydrolase-like protein 5	; juvenile hormone epoxide hydrolase-like protein 5|GLEAN_03436|Juvenile hormone epoxide hydrolase 1-like Protein
1353	LOC655128	2.3924	0.00319545	TcasGA2_TC014541	cysteine and histidine-rich protein 1	; cysteine and histidine-rich protein 1|GLEAN_14541
1354	LOC661409	2.39135	0.000531793	TcasGA2_TC000760, serpin1	antichymotrypsin-2	; antichymotrypsin-2|AUGUSTUS-3.0.2_00760|AUGUSTUS-3.0.2_32044|GLEAN_00760|serpin peptidase inhibitor 1
1355	LOC103314693	2.39041	0.00839877	TcasGA2_TC000122	N-myc protein	; N-myc protein|AUGUSTUS-3.0.2_32473|GLEAN_00122|GLEAN_00123
1356	LOC656972	2.38824	9.73847e-05	TcasGA2_TC016227, HERC2	E3 ubiquitin-protein ligase HERC2	; LOW QUALITY PROTEIN: E3 ubiquitin-protein ligase HERC2|AUGUSTUS-3.0.2_16227|AUGUSTUS-3.0.2_31420|GLEAN_16227|GLEAN_16228|hect domain and RLD 2|hect domain and RLD 2-like protein|putative E3 ubiquitin-protein ligase HERC2-like Protein
1357	LOC656141	2.3877	6.08291e-08	TcasGA2_TC001571, Gcl	germ cell-less	; protein germ cell-less|uncharacterized protein LOC656141|AUGUSTUS-3.0.2_01571|GLEAN_01571
1358	LOC660242	2.38684	0.0451282	TcasGA2_TC014869	RIMS-binding protein 2	; RIMS-binding protein 2|peripheral-type benzodiazepine receptor-associated protein 1|AUGUSTUS-3.0.2_33471|GLEAN_14869|GLEAN_14870
1359	LOC663677	2.38636	0.0193763	TcasGA2_TC008096	dorsal 2	; embryonic polarity protein dorsal|AUGUSTUS-3.0.2_08096|GLEAN_08096
1360	LOC103314056	2.38611	0.0131315	TcasGA2_TC032601	uncharacterized LOC103314056	; uncharacterized protein LOC103314056|AUGUSTUS-3.0.2_32601
1361	LOC663556	2.38335	0.0026549	TcasGA2_TC011769	myosin regulatory light chain 2	; myosin regulatory light chain 2|similar to Myosin regulatory light chain 2 (MLC-2)|AUGUSTUS-3.0.2_11769|GLEAN_11769|Myosin regulatory light chain 2-like Protein
1362	LOC658237	2.38301	6.56138e-06	TcasGA2_TC000112	ceramide phosphoethanolamine synthase	; ceramide phosphoethanolamine synthase|probable ATP-dependent RNA helicase DHX35|AUGUSTUS-3.0.2_34597|Ceramide phosphoethanolamine synthase-like protein|Dosage compensation regulator-like Protein|GLEAN_00112
1363	LOC659436	2.38249	9.30091e-05	TcasGA2_TC004846	early growth response protein 1-B	; early growth response protein 1|early growth response protein 1-B|AUGUSTUS-3.0.2_04846|GLEAN_04846
1364	LOC660354	2.38209	6.79402e-08	TcasGA2_TC033075	protein grindelwald	; protein grindelwald|AUGUSTUS-3.0.2_33075
1365	LOC659997	2.38188	0.00837149	TcasGA2_TC009817	ubiquitin carboxyl-terminal hydrolase 34	; ubiquitin carboxyl-terminal hydrolase 34|AUGUSTUS-3.0.2_09817|GLEAN_09817|Ubiquitin carboxyl-terminal hydrolase 34-like Protein
1366	Tmem120b	2.38146	0.0366786	TcasGA2_TC003901	transmembrane protein 120B	; transmembrane protein 120B|AUGUSTUS-3.0.2_03901|GLEAN_03901|Transmembrane protein 120 homolog-like Protein
1367	LOC107398702	2.3806	0.000491938	TcasGA2_TC034465	potassium channel subfamily K member 18-like	; potassium channel subfamily K member 18-like|uncharacterized protein LOC107398702|AUGUSTUS-3.0.2_34465
1368	LOC100142605	2.38019	0.006766	TcasGA2_TC003960	ankyrin-3	; ankyrin-2|ankyrin-3|titin|AUGUSTUS-3.0.2_34635|GLEAN_03960|GLEAN_03961
1369	LOC658335	2.37953	0.000126568		angiotensin-converting enzyme-like	; LOW QUALITY PROTEIN: angiotensin-converting enzyme-like
1370	LOC663654	2.37902	8.12098e-05	TcasGA2_TC008635	phosphofurin acidic cluster sorting protein 1	; phosphofurin acidic cluster sorting protein 1|AUGUSTUS-3.0.2_08635|GLEAN_08635|Phosphofurin acidic cluster sorting protein 1-like Protein
1371	LOC107399298	2.37796	0.0282282		uncharacterized LOC107399298	; uncharacterized protein LOC107399298
1372	LOC655134	2.37704	0.000154051	TcasGA2_TC015113	RNA-binding protein 26	; LOW QUALITY PROTEIN: RNA-binding protein 26|AUGUSTUS-3.0.2_33396|AUGUSTUS-3.0.2_33397|GLEAN_15113
1373	LOC659479	2.37675	0.00388387	TcasGA2_TC012434, WRCH-1	cell division control protein 42 homolog	; cell division control protein 42 homolog|AUGUSTUS-3.0.2_12434|Cdc42 homolog-like Protein|GLEAN_12434
1374	LOC664126	2.37616	0.012838	TcasGA2_TC003527	protein lifeguard 1	; protein lifeguard 1|AUGUSTUS-3.0.2_03527|GLEAN_03527|Protein lifeguard 1-like Protein
1375	LOC661174	2.37557	0.00110659	TcasGA2_TC012457	rho-related BTB domain-containing protein 2	; rho-related BTB domain-containing protein 2|AUGUSTUS-3.0.2_12457|GLEAN_12457|Rho-related BTB domain-containing protein 1-like Protein
1376	LOC655737	2.3737	0.0154202	TcasGA2_TC004741	facilitated trehalose transporter Tret1	; facilitated trehalose transporter Tret1|GLEAN_04741
1377	LOC656833	2.37334	0.0154183	TcasGA2_TC001301, H29	serine protease H29	; mast cell tryptase|AUGUSTUS-3.0.2_01301|GLEAN_01301
1378	LOC656260	2.37077	0.0150795	TcasGA2_TC007500	otopetrin-2	; otopetrin-2|AUGUSTUS-3.0.2_07500|GLEAN_07500
1379	Hph	2.3705	0.000180099	TcasGA2_TC009132	HIF prolyl hydroxylase	; HIF prolyl hydroxylase|AUGUSTUS-3.0.2_33631|Egl nine homolog 1-like Protein
1380	LOC661693	2.3703	9.42341e-09	TcasGA2_TC005773	tetratricopeptide repeat protein 36 homolog	; tetratricopeptide repeat protein 36 homolog|AUGUSTUS-3.0.2_05773|GLEAN_05773|Tetratricopeptide repeat protein 36 homolog-like Protein
1381	LOC100141944	2.36889	0.00250345	TcasGA2_TC030628	tetratricopeptide repeat protein 4	; tetratricopeptide repeat protein 4|AUGUSTUS-3.0.2_30628|GLEAN_15303-OG16574|Tetratricopeptide repeat protein 4-like Protein
1382	LOC655168	2.36804	1.66038e-07	TcasGA2_TC014954	scavenger receptor class B member 1	; scavenger receptor class B member 1|AUGUSTUS-3.0.2_14954|GLEAN_14954|Protein croquemort-like Protein
1383	LOC103313645	2.36657	0.0152987	TcasGA2_TC009776	hypothetical protein	; uncharacterized protein LOC103313645|GLEAN_09776
1384	LOC663080	2.36604	5.80427e-11	TcasGA2_TC005979	atypical protein kinase C	; atypical protein kinase C|AUGUSTUS-3.0.2_33980|GLEAN_05979|GLEAN_05980|Protein kinase C iota type-like Protein|protein kinase C iota type
1385	LOC657290	2.36586	0.0470606	TcasGA2_TC031574	uncharacterized LOC657290	; uncharacterized protein LOC657290|AUGUSTUS-3.0.2_31574|G1/S-specific cyclin-E-like Protein
1386	LOC656640	2.36475	0.00465541	TcasGA2_TC016378	neural cell adhesion molecule 2	; neural cell adhesion molecule 2|AUGUSTUS-3.0.2_33671|AUGUSTUS-3.0.2_33672|GLEAN_16378|GLEAN_16379
1387	LOC658052	2.3643	0.0442071	TcasGA2_TC010114	uncharacterized LOC658052	; uncharacterized protein LOC658052|AUGUSTUS-3.0.2_10114|GLEAN_10114
1388	LOC655414	2.36294	0.0343879	TcasGA2_TC004525	probable JmjC domain-containing histone demethylation protein 2C	; probable JmjC domain-containing histone demethylation protein 2C|AUGUSTUS-3.0.2_31981|GLEAN_04525|GLEAN_04526
1389	Lac1	2.36189	0.000414769	TcasGA2_TC000821, TcLac1	laccase 1	; laccase 1|AUGUSTUS-3.0.2_00821|GLEAN_00821|Laccase-5-like Protein|para-diphenol:dioxygen oxidoreductase
1390	LOC655467	2.3608	5.86454e-07	TcasGA2_TC002190	protein winged eye	; protein winged eye|AUGUSTUS-3.0.2_31262|GLEAN_02190|GLEAN_02191
1391	LOC663955	2.36051	1.47969e-09	TcasGA2_TC000684	uncharacterized LOC663955	; uncharacterized protein LOC663955|AUGUSTUS-3.0.2_32093|AUGUSTUS-3.0.2_32094|GLEAN_00684
1392	LOC664364	2.36	1.25244e-05	TcasGA2_TC000930	SPARC	; SPARC|AUGUSTUS-3.0.2_00930|GLEAN_00930|SPARC-like Protein
1393	LOC656462	2.35874	0.0429128	TcasGA2_TC031132	pre-mRNA-splicing factor SYF1	; pre-mRNA-splicing factor SYF1|AUGUSTUS-3.0.2_31132|Pre-mRNA-splicing factor SYF1-like Protein
1394	LOC655343	2.35662	0.0458562	TcasGA2_TC003561	heparan-alpha-glucosaminide N-acetyltransferase	; heparan-alpha-glucosaminide N-acetyltransferase|AUGUSTUS-3.0.2_03561|GLEAN_03561|Heparan-alpha-glucosaminide N-acetyltransferase-like Protein
1395	LOC658297	2.35603	3.62536e-07	TcasGA2_TC006333	uncharacterized LOC658297	; uncharacterized protein LOC658297|AUGUSTUS-3.0.2_34046|GLEAN_06333|GLEAN_06334
1396	LOC656627	2.35584	5.7746e-05		aspartyl/asparaginyl beta-hydroxylase	; aspartyl/asparaginyl beta-hydroxylase|AUGUSTUS-3.0.2_01594|Aspartyl/asparaginyl beta-hydroxylase-like Protein|GLEAN_01594
1397	LOC662190	2.35511	9.33377e-06	TcasGA2_TC014241	single-stranded DNA-binding protein 3	; single-stranded DNA-binding protein 3|AUGUSTUS-3.0.2_14241|GLEAN_14241
1398	LOC660454	2.3517	1.05552e-06	TcasGA2_TC010420	dynamin-like 120 kDa protein, mitochondrial	; dynamin-like 120 kDa protein, mitochondrial|AUGUSTUS-3.0.2_10420|GLEAN_10420
1399	LOC658550	2.35051	0.0215274		golgin-84	; golgin-84|AUGUSTUS-3.0.2_04294|GLEAN_04294|Golgin-84-like Protein
1400	LOC658744	2.3501	0.0185197	TcasGA2_TC005811	monocarboxylate transporter 12	; monocarboxylate transporter 12|AUGUSTUS-3.0.2_05811|GLEAN_05811
1401	LOC663557	2.34903	0.000129205	TcasGA2_TC000713	uncharacterized LOC663557	; uncharacterized LOC663557|AUGUSTUS-3.0.2_30991|GLEAN_00713|Protein FAM46C-like Protein
1402	LOC654915	2.34838	0.000146213	TcasGA2_TC002636	neural cell adhesion molecule 2	; neural cell adhesion molecule 2|protein amalgam|AUGUSTUS-3.0.2_02636|Fasciclin-2-like Protein|GLEAN_02636
1403	LOC103315156	2.34779	0.00610196	TcasGA2_TC032050	leucine-rich repeat-containing G-protein coupled receptor 4-like	; leucine-rich repeat-containing G-protein coupled receptor 4-like|AUGUSTUS-3.0.2_32050|Chaoptin-like Protein
1404	LOC662047	2.34718	0.000202859		importin subunit beta-1	; importin subunit beta-1
1405	LOC655913	2.34707	0.000931052	TcasGA2_TC004440	vacuolar protein sorting-associated protein 13C	; vacuolar protein sorting-associated protein 13C|AUGUSTUS-3.0.2_04440|AUGUSTUS-3.0.2_04451|GLEAN_04440|GLEAN_04451|Vacuolar protein sorting-associated protein 13A-like Protein|Vacuolar protein sorting-associated protein 13C-like Protein
1406	LOC656904	2.34434	0.000984972	TcasGA2_TC011461	tropomyosin-1	; similar to tropomyosin 1|tropomyosin-1|AUGUSTUS-3.0.2_11461|GLEAN_11461|Tropomyosin-2-like Protein
1407	LOC661913	2.34316	0.00311713	TcasGA2_TC004801	endophilin-A	; endophilin-A|AUGUSTUS-3.0.2_04801|Endophilin-A-like Protein|GLEAN_04801
1408	LOC664293	2.34068	0.0182012	TcasGA2_TC007110	uncharacterized LOC664293	; uncharacterized protein LOC664293|AUGUSTUS-3.0.2_07110|GLEAN_07110
1409	LOC657801	2.33987	0.0292284	TcasGA2_TC030557	programmed cell death protein 10	; programmed cell death protein 10|AUGUSTUS-3.0.2_34683|NONGLEAN-OG19179|Programmed cell death protein 10-like protein
1410	LOC660356	2.33932	6.68798e-12	TcasGA2_TC014286	probable 26S proteasome non-ATPase regulatory subunit 3	; probable 26S proteasome non-ATPase regulatory subunit 3|GLEAN_14286
1411	LOC656353	2.33836	3.91284e-05	TcasGA2_TC014560	mediator of RNA polymerase II transcription subunit 12	; mediator of RNA polymerase II transcription subunit 12|AUGUSTUS-3.0.2_14560|GLEAN_14560|Mediator of RNA polymerase II transcription subunit 12-like Protein
1412	LOC103315209	2.338	0.0447223	TcasGA2_TC000457	hypothetical protein	; uncharacterized protein LOC103315209|AUGUSTUS-3.0.2_00457|GLEAN_00457
1413	LOC657796	2.33782	0.0224586	TcasGA2_TC007482	inositol-trisphosphate 3-kinase A	; inositol-trisphosphate 3-kinase A|AUGUSTUS-3.0.2_31102|AUGUSTUS-3.0.2_32797|GLEAN_07482|GLEAN_07485|Inositol-trisphosphate 3-kinase B-like Protein
1414	LOC663405	2.33775	0.0439156	TcasGA2_TC008910	hypothetical protein	; uncharacterized protein LOC663405|AUGUSTUS-3.0.2_33757|AUGUSTUS-3.0.2_33758|GLEAN_08910
1415	LOC661643	2.33488	0.0114951	TcasGA2_TC015061	AP-1 complex subunit beta-1	; AP-1 complex subunit beta-1|AP-2 complex subunit beta-like Protein|AUGUSTUS-3.0.2_15061|GLEAN_15061
1416	LOC664395	2.33438	0.0169828		alpha-amylase-like	; LOW QUALITY PROTEIN: alpha-amylase-like
1417	LOC658407	2.33092	4.35154e-05	TcasGA2_TC011429	centaurin-gamma-1A	; centaurin-gamma-1A|AUGUSTUS-3.0.2_11430|AUGUSTUS-3.0.2_31409|Centaurin-gamma-1A-like Protein|GLEAN_11429|GLEAN_11430
1418	LOC662944	2.32881	0.0282666	TcasGA2_TC009756	sodium/hydrogen exchanger 10	; sodium/hydrogen exchanger 10|AUGUSTUS-3.0.2_33683|AUGUSTUS-3.0.2_33684|GLEAN_09756
1419	LOC657883	2.3281	0.0211375	TcasGA2_TC014494	serine/threonine-protein phosphatase 2A activator	; serine/threonine-protein phosphatase 2A activator|GLEAN_14494
1420	LOC659230	2.32795	0.000943622	TcasGA2_TC003116	FIT family protein CG10671	; FIT family protein CG10671|AUGUSTUS-3.0.2_03116|FIT family protein CG10671-like Protein|GLEAN_03116
1421	LOC663804	2.32776	0.0112177	TcasGA2_TC011754	ABC transporter G family member 20	; ABC transporter G family member 20|ABC transporter G family member 23-like Protein|AUGUSTUS-3.0.2_34444|GLEAN_11754|GLEAN_11755
1422	LOC103312658	2.32773	0.00555933	TcasGA2_TC008044	uncharacterized LOC103312658	; uncharacterized protein LOC103312658|AUGUSTUS-3.0.2_08044|GLEAN_08044
1423	LOC659430	2.32772	5.72975e-09	TcasGA2_TC008273	choline/ethanolaminephosphotransferase 1	; choline/ethanolaminephosphotransferase 1|cholinephosphotransferase 1|AUGUSTUS-3.0.2_08273|Choline/ethanolaminephosphotransferase 1-like Protein|GLEAN_08273
1424	LOC103312437	2.32751	0.0319122	TcasGA2_TC002643	biogenesis of lysosome-related organelles complex 1 subunit 4	; biogenesis of lysosome-related organelles complex 1 subunit 4|AUGUSTUS-3.0.2_02643|Biogenesis of lysosome-related organelles complex 1 subunit 4-like Protein|GLEAN_02643
1425	Ago-2b	2.3274	0.0318	TcasGA2_TC013762, Ago2B	Argonaute-2b	; Argonaute-2b|argonaute-2b|AUGUSTUS-3.0.2_13762|GLEAN_13762
1426	LOC100141690	2.32703	3.23573e-10	TcasGA2_TC031341	nose resistant to fluoxetine protein 6-like	; nose resistant to fluoxetine protein 6-like|AUGUSTUS-3.0.2_31341|Nose resistant to fluoxetine protein 6-like Protein
1427	LOC103313725	2.327	0.0103984	TcasGA2_TC030677	E3 ubiquitin-protein ligase Topors	; E3 ubiquitin-protein ligase Topors|AUGUSTUS-3.0.2_30677|E3 ubiquitin-protein ligase Topors-like Protein|GLEAN_10032-OG2292
1428	LOC657872	2.32675	0.00470012	TcasGA2_TC003691	chromobox protein homolog 1	; chromobox protein homolog 1|AUGUSTUS-3.0.2_03691|GLEAN_03691
1429	LOC100141647	2.32485	0.000609356	TcasGA2_TC000523	engulfment and cell motility protein 1	; engulfment and cell motility protein 1|AUGUSTUS-3.0.2_00523|AUGUSTUS-3.0.2_00525|Engulfment and cell motility protein 1-like Protein|GLEAN_00523|GLEAN_00525
1430	LOC657390	2.3248	0.025458	TcasGA2_TC004953	lysosomal alpha-glucosidase	; lysosomal alpha-glucosidase|AUGUSTUS-3.0.2_04953|GLEAN_04953|Lysosomal alpha-glucosidase-like Protein|putative maltase-glucoamylase-like protein FLJ16351
1431	LOC659577	2.32474	0.0117577	TcasGA2_TC007875	bestrophin-3	; bestrophin-3|AUGUSTUS-3.0.2_07875|Bestrophin-3-like Protein|GLEAN_07875
1432	LOC660199	2.32424	0.000738918	TcasGA2_TC011685	calmodulin-lysine N-methyltransferase	; WW domain-binding protein 4|calmodulin-lysine N-methyltransferase|AUGUSTUS-3.0.2_11685|GLEAN_11685
1433	LOC657384	2.32354	0.0250852		palmitoyltransferase ZDHHC5	; palmitoyltransferase ZDHHC5|AUGUSTUS-3.0.2_02345|GLEAN_02345
1434	LOC662102	2.3231	4.03611e-08	TcasGA2_TC010873	ensconsin	; MAP7 domain-containing protein 1|ensconsin|histone-lysine N-methyltransferase, H3 lysine-79 specific|AUGUSTUS-3.0.2_10873|GLEAN_10873
1435	LOC658542	2.32096	1.1419e-05	TcasGA2_TC016320	1-acyl-sn-glycerol-3-phosphate acyltransferase delta	; 1-acyl-sn-glycerol-3-phosphate acyltransferase delta|1-acyl-sn-glycerol-3-phosphate acyltransferase delta-like Protein|AUGUSTUS-3.0.2_16320|GLEAN_16320
1436	LOC659921	2.32087	2.12343e-05	TcasGA2_TC014376	ankyrin-3	; ankyrin-3|GLEAN_14376
1437	LOC664145	2.32073	0.0257965	TcasGA2_TC013075	E3 ubiquitin-protein ligase MARCH8	; E3 ubiquitin-protein ligase MARCH8|GLEAN_13075
1438	LOC103313915	2.31779	0.0104232	TcasGA2_TC005859	rap guanine nucleotide exchange factor	; rap guanine nucleotide exchange factor|AUGUSTUS-3.0.2_05859|GLEAN_05859|Rap guanine nucleotide exchange factor-like Protein
1439	LOC655914	2.31623	0.0160526	TcasGA2_TC011312	rab GTPase-activating protein 1-like	; rab GTPase-activating protein 1-like|AUGUSTUS-3.0.2_11312|GLEAN_11312|Rab GTPase-activating protein 1-like Protein
1440	LOC656650	2.31564	5.35845e-08	TcasGA2_TC001103	eukaryotic translation initiation factor 2 subunit 3, X-linked	; eukaryotic translation initiation factor 2 subunit 3, X-linked|histone-lysine N-methyltransferase SUV39H2|AUGUSTUS-3.0.2_01103|Eukaryotic translation initiation factor 2 subunit 3-like Protein|GLEAN_01103
1441	LOC655005	2.31504	0.042963	TcasGA2_TC006259	ankyrin repeat and zinc finger domain-containing protein 1	; ankyrin repeat and zinc finger domain-containing protein 1|AUGUSTUS-3.0.2_06259|GLEAN_06259|Protein vms-1-like Protein
1442	LOC660495	2.31308	3.17035e-08	TcasGA2_TC006029	protein diaphanous	; protein diaphanous|AUGUSTUS-3.0.2_06029|GLEAN_06029|Protein diaphanous-like Protein
1443	LOC663866	2.31135	8.78118e-06	TcasGA2_TC009960	ADAMTS-like protein 1	; ADAMTS-like protein 1|ADAMTS-like protein 3|AUGUSTUS-3.0.2_33766|AUGUSTUS-3.0.2_33768|GLEAN_09960
1444	Rab14	2.31051	1.01119e-12	TcasGA2_TC013891	Rab-protein 14	; Rab-protein 14|AUGUSTUS-3.0.2_13891|GLEAN_13891|Ras-related protein Rab-14-like Protein
1445	LOC103312152	2.30985	0.0186437	TcasGA2_TC032228	glutamyl aminopeptidase-like	; glutamyl aminopeptidase-like|AUGUSTUS-3.0.2_32228|Glutamyl aminopeptidase-like Protein
1446	LOC658694	2.3098	0.037852	TcasGA2_TC010900	transcription initiation factor IIB	; transcription initiation factor IIB|AUGUSTUS-3.0.2_10900|GLEAN_10900|Transcription initiation factor IIB-like Protein
1447	LOC659099	2.30966	3.40528e-05	TcasGA2_TC015698	ras-related protein Rab-9A	; ras-related protein Rab-9A|AUGUSTUS-3.0.2_15698|GLEAN_15698|Ras-related protein Rab-9A-like Protein
1448	LOC659492	2.30936	0.0120672	TcasGA2_TC004379	trophoblast glycoprotein	; trophoblast glycoprotein|AUGUSTUS-3.0.2_04379|GLEAN_04379|Trophoblast glycoprotein-like Protein
1449	LOC663854	2.30592	0.000781447	TcasGA2_TC008618	CLIP-associating protein	; CLIP-associating protein 1-B|CLIP-associating protein|AUGUSTUS-3.0.2_08618|CLIP-associating protein-like Protein|GLEAN_08618
1450	LOC655303	2.30548	0.0125588	TcasGA2_TC012467	sulfotransferase 1 family member D1	; sulfotransferase 1 family member D1|AUGUSTUS-3.0.2_12467|GLEAN_12467|Sulfotransferase family cytosolic 1B member 1-like Protein
1451	LOC103312885	2.30505	0.0471445	TcasGA2_TC031765	uncharacterized LOC103312885	; uncharacterized protein LOC103312885|AUGUSTUS-3.0.2_31765|GLEAN_08539|GLEAN_08540|GLEAN_08541
1452	LOC103312740	2.30451	0.00181364	TcasGA2_TC008126	uncharacterized LOC103312740	; uncharacterized protein LOC103312740|AUGUSTUS-3.0.2_08126|AUGUSTUS-3.0.2_34656|GLEAN_08126
1453	LOC658530	2.30448	0.0147072	TcasGA2_TC012659	pre-mRNA-processing factor 19	; pre-mRNA-processing factor 19|GLEAN_12659
1454	LOC658922	2.30436	0.0128397	TcasGA2_TC032219, Sd	scalloped	; protein scalloped|transcriptional enhancer factor TEF-1|AUGUSTUS-3.0.2_32219|Protein scalloped-like Protein|scalloped protein
1455	LOC100141557	2.30328	4.50452e-05	TcasGA2_TC008427	uncharacterized LOC100141557	; uncharacterized protein LOC100141557|AUGUSTUS-3.0.2_32938|AUGUSTUS-3.0.2_32939|GLEAN_08427|Protein white-like Protein|nucleolar pre-ribosomal-associated protein 1
1456	LOC659835	2.3032	0.00497943	TcasGA2_TC006591	E3 ubiquitin-protein ligase MARCH6	; E3 ubiquitin-protein ligase MARCH6|AUGUSTUS-3.0.2_06591|E3 ubiquitin-protein ligase MARCH6-like Protein|GLEAN_06591
1457	LOC655171	2.30283	0	TcasGA2_TC009690	uncharacterized LOC655171	; uncharacterized protein LOC655171|AUGUSTUS-3.0.2_09690|Esterase-6-like Protein|GLEAN_09690
1458	LOC660608	2.30276	0.000575123	TcasGA2_TC015854	scavenger receptor class B member 1	; scavenger receptor class B member 1|AUGUSTUS-3.0.2_15854|GLEAN_15854|Protein croquemort-like Protein
1459	LOC103312542	2.30164	0.00145864		receptor-type tyrosine-protein phosphatase alpha	; receptor-type tyrosine-protein phosphatase alpha|GLEAN_16252
1460	LOC658816	2.29966	0.0499961		inactive rhomboid protein 1	; inactive rhomboid protein 1
1461	LOC659328	2.29714	0.0304434	TcasGA2_TC009877, CYP49A1	cytochrome P450 49A1	; probable cytochrome P450 49a1|AUGUSTUS-3.0.2_09877|GLEAN_09877
1462	LOC659849	2.29658	2.35367e-14	TcasGA2_TC007470	ATP-binding cassette sub-family G member 1	; ATP-binding cassette sub-family G member 1|AUGUSTUS-3.0.2_07470|GLEAN_07470|Protein white-like Protein
1463	LOC654998	2.29373	1.19134e-05	TcasGA2_TC015114	solute carrier family 35 member F6	; solute carrier family 35 member F6|AUGUSTUS-3.0.2_15114|GLEAN_15114|Solute carrier family 35 member F6-like Protein
1464	LOC663782	2.29277	0.000116249	TcasGA2_TC012737	uncharacterized protein C2orf42 homolog	; uncharacterized protein C2orf42 homolog|AUGUSTUS-3.0.2_12737|GLEAN_12737
1465	LOC659327	2.29033	2.07363e-06	TcasGA2_TC015841	uncharacterized LOC659327	; uncharacterized protein LOC659327|AUGUSTUS-3.0.2_15841|AUGUSTUS-3.0.2_15842|GLEAN_15841|GLEAN_15842|Protein takeout-like Protein
1466	LOC664292	2.29031	9.25786e-09	TcasGA2_TC007521	arginine--tRNA ligase, cytoplasmic	; arginine--tRNA ligase, cytoplasmic|AUGUSTUS-3.0.2_07521|GLEAN_07521|putative arginine--tRNA ligase, cytoplasmic-like Protein
1467	LOC660778	2.28986	0.00789163	TcasGA2_TC015856	sphingolipid delta(4)-desaturase DES1	; sphingolipid delta(4)-desaturase DES1|AUGUSTUS-3.0.2_15856|GLEAN_15856|Sphingolipid delta(4)-desaturase DES1-like Protein
1468	LOC658879	2.28919	0.000233493	TcasGA2_TC014932, Ets97D, Gabpa	GA binding protein transcription factor, alpha subunit 60kDa	; DNA-binding protein Ets97D|GLEAN_14932
1469	LOC661780	2.28869	0.0212482	TcasGA2_TC012866	FACT complex subunit Ssrp1	; FACT complex subunit Ssrp1|AUGUSTUS-3.0.2_12866|FACT complex subunit Ssrp1-like Protein|GLEAN_12866
1470	Atp6v0b	2.28751	1.31961e-12	TcasGA2_TC004599	ATPase, H+ transporting, lysosomal 21kDa, V0 subunit b	; ATPase, H+ transporting, lysosomal 21kDa, V0 subunit b|AUGUSTUS-3.0.2_04599|GLEAN_04599|V-type proton ATPase 16 kDa proteolipid subunit-like Protein
1471	LOC658918	2.28724	0.0235495	TcasGA2_TC004967	saccharopine dehydrogenase-like oxidoreductase	; saccharopine dehydrogenase-like oxidoreductase|GLEAN_04967
1472	Pmp14	2.28546	0.00990126	TcasGA2_TC033952	peritrophic matrix protein 14	; peritrophic matrix protein 14|AUGUSTUS-3.0.2_33952
1473	LOC663066	2.28491	1.06634e-07	TcasGA2_TC002955	cathepsin B precursor	; cathepsin B|AUGUSTUS-3.0.2_02955|GLEAN_02955
1474	LOC661561	2.28443	7.62976e-05	TcasGA2_TC006138	annexin A7	; annexin A7|uncharacterized protein LOC661561|AUGUSTUS-3.0.2_06138|GLEAN_06138|protein SSXT
1475	LOC664311	2.28395	0.00601246	TcasGA2_TC009981	flavin reductase (NADPH)	; flavin reductase (NADPH)|AUGUSTUS-3.0.2_09981|Flavin reductase (NADPH)-like Protein|GLEAN_09981
1476	LOC660655	2.28361	0.000317401	TcasGA2_TC008270	G1/S-specific cyclin-D1	; G1/S-specific cyclin-D1|AUGUSTUS-3.0.2_08270|G2/mitotic-specific cyclin-A-like Protein|GLEAN_08270
1477	LOC661559	2.28318	0.0220884	TcasGA2_TC009089, P90, P91	uncharacterized LOC661559	; uncharacterized protein LOC661559|AUGUSTUS-3.0.2_09089|AUGUSTUS-3.0.2_09090|GLEAN_09089|GLEAN_09090|serine protease P90|serine protease P91
1478	LOC660010	2.28242	3.09324e-06		uncharacterized LOC660010	; uncharacterized protein LOC660010|AUGUSTUS-3.0.2_02263|GLEAN_02263
1479	LOC100141926	2.28089	0.00302619	TcasGA2_TC011871	galectin-4	; galectin-4|AUGUSTUS-3.0.2_34415|AUGUSTUS-3.0.2_34416|GLEAN_11871
1480	LOC103313369	2.28084	0.00787757	TcasGA2_TC015516	uncharacterized LOC103313369	; uncharacterized protein LOC103313369|AUGUSTUS-3.0.2_33353|GLEAN_15516
1481	Cda2	2.28055	0.00549462	TcasGA2_TC014101, TcCDA2	chitin deacetylase 2	; chitin deacetylase 2|AUGUSTUS-3.0.2_14101|GLEAN_14101
1482	LOC659634	2.27996	5.34212e-07	TcasGA2_TC003209	protein phosphatase 1 regulatory subunit 12A	; protein phosphatase 1 regulatory subunit 12A|protein phosphatase 1 regulatory subunit 12B|AUGUSTUS-3.0.2_03209|GLEAN_03209
1483	HEX5	2.27814	0.0249916	TcasGA2_TC006515	hexamerin 5	; hexamerin 5|AUGUSTUS-3.0.2_06515|Larval serum protein 2-like Protein|copper binding protein
1484	LOC660897	2.27786	0.0253949	TcasGA2_TC006667	facilitated trehalose transporter Tret1	; facilitated trehalose transporter Tret1|GLEAN_06667
1485	LOC659807	2.27752	0.000867222	TcasGA2_TC012191	dual specificity testis-specific protein kinase 2	; dual specificity testis-specific protein kinase 2|AUGUSTUS-3.0.2_12191|GLEAN_12191|LIM domain kinase 1-like Protein
1486	LOC659936	2.27727	0.0110145	TcasGA2_TC005857, Ago-1, Ago1	Argonaute-1	; protein argonaute-2|AUGUSTUS-3.0.2_05857|GLEAN_05857|argonaute 1
1487	LOC655360	2.27705	0.0204706	TcasGA2_TC013635	fibrillin-1	; fibrillin-1|AUGUSTUS-3.0.2_13635|GLEAN_13635|Neurogenic locus Notch protein-like Protein
1488	LOC661500	2.27681	8.04398e-06	TcasGA2_TC007452	homeodomain-interacting protein kinase 2	; homeodomain-interacting protein kinase 2|AUGUSTUS-3.0.2_07452|GLEAN_07452|Homeodomain-interacting protein kinase 2-like Protein
1489	LOC658180	2.27557	0.0498369	TcasGA2_TC004959	geranylgeranyl transferase type-1 subunit beta	; geranylgeranyl transferase type-1 subunit beta|similar to protein geranylgeranyltransferase type I, beta subunit|AUGUSTUS-3.0.2_04959|AUGUSTUS-3.0.2_04960|DTW domain-containing protein 2|DTW domain-containing protein 2-like Protein|GLEAN_04959|GLEAN_04960|Geranylgeranyl transferase type-1 subunit beta-like Protein
1490	LOC662307	2.2748	3.0876e-05	TcasGA2_TC009562	transmembrane protein 245	; transmembrane protein 245|AUGUSTUS-3.0.2_09562|GLEAN_09562|Transmembrane protein 245-like Protein
1491	LOC661118	2.27387	6.01161e-05	TcasGA2_TC012393	kelch-like protein 26	; kelch-like protein 26|AUGUSTUS-3.0.2_12393|GLEAN_12393|Ring canal kelch protein-like Protein
1492	LOC663360	2.2724	0.00183047	TcasGA2_TC000541, IKKg	IKK gamma	; NF-kappa-B essential modulator|AUGUSTUS-3.0.2_00541|GLEAN_00541
1493	LOC656951	2.27219	0.000190142	TcasGA2_TC009389	mitotic spindle assembly checkpoint protein MAD1	; mitotic spindle assembly checkpoint protein MAD1|AUGUSTUS-3.0.2_09389|GLEAN_09389|Mitotic spindle assembly checkpoint protein MAD1-like Protein
1494	LOC663793	2.27164	0.0258386	TcasGA2_TC011756	alpha-tocopherol transfer protein	; alpha-tocopherol transfer protein|AUGUSTUS-3.0.2_11756|Alpha-tocopherol transfer protein-like Protein|GLEAN_11756
1495	LOC660437	2.27112	3.30215e-05	TcasGA2_TC005468	uncharacterized LOC660437	; uncharacterized protein LOC660437|AUGUSTUS-3.0.2_05468|GLEAN_05468
1496	LOC659102	2.26825	0.0102534	TcasGA2_TC008970	protein CDV3 homolog	; protein CDV3 homolog|AUGUSTUS-3.0.2_08970|GLEAN_08970|Protein CDV3 homolog-like Protein
1497	LOC658042	2.26793	5.90642e-07	TcasGA2_TC013542	transmembrane 9 superfamily member 2	; transmembrane 9 superfamily member 2|GLEAN_13542
1498	LOC655742	2.26688	1.12371e-05	TcasGA2_TC011073, brahma, brm	ATP-dependent helicase brm	; ATP-dependent helicase brm|AUGUSTUS-3.0.2_11073|GLEAN_11073
1499	LOC657584	2.26601	0.0124059	TcasGA2_TC033635	bifunctional glutamate/proline--tRNA ligase	; bifunctional glutamate/proline--tRNA ligase|AUGUSTUS-3.0.2_33635|AUGUSTUS-3.0.2_33636|Bifunctional glutamate/proline--tRNA ligase-like Protein
1500	LOC661766	2.26522	0	TcasGA2_TC015130, P154	serine protease P154	; chymotrypsin BI|uncharacterized protein LOC661766|AUGUSTUS-3.0.2_15130|GLEAN_15130
1501	LOC657581	2.26388	0.00201262	TcasGA2_TC009428	calcium-independent phospholipase A2-gamma	; calcium-independent phospholipase A2-gamma|AUGUSTUS-3.0.2_09428|Calcium-independent phospholipase A2-gamma-like Protein|GLEAN_09428
1502	LOC663038	2.26358	3.3741e-07	TcasGA2_TC007429	CD9 antigen	; CD9 antigen|AUGUSTUS-3.0.2_07429|AUGUSTUS-3.0.2_07430|GLEAN_07429|GLEAN_07430
1503	LOC657349	2.26227	0.0479978	TcasGA2_TC009599	sister chromatid cohesion protein PDS5 homolog B	; sister chromatid cohesion protein PDS5 homolog B|AUGUSTUS-3.0.2_09599|GLEAN_09599|Sister chromatid cohesion protein PDS5 homolog B-like Protein
1504	LOC100141546	2.2621	3.49523e-06	TcasGA2_TC002408	protein-methionine sulfoxide oxidase Mical	; protein-methionine sulfoxide oxidase Mical|AUGUSTUS-3.0.2_32686|GLEAN_02408|Protein-methionine sulfoxide oxidase Mical-like Protein
1505	LOC103312459	2.26201	0.000236398	TcasGA2_TC003821	WD repeat-containing protein 43	; WD repeat-containing protein 43|AUGUSTUS-3.0.2_03821|GLEAN_03821|WD repeat-containing protein 43-like Protein
1506	LOC660424	2.26151	0.0107747	TcasGA2_TC014918	CDGSH iron-sulfur domain-containing protein 3, mitochondrial	; CDGSH iron-sulfur domain-containing protein 3, mitochondrial|AUGUSTUS-3.0.2_14918|CDGSH iron-sulfur domain-containing protein 3, mitochondrial-like Protein|GLEAN_14918
1507	LOC658838	2.2596	6.09642e-06		RING finger protein 11	; RING finger protein 11|AUGUSTUS-3.0.2_04296|GLEAN_04296|RING finger protein 11-like Protein
1508	LOC655156	2.25413	4.70144e-07	TcasGA2_TC016214	heterogeneous nuclear ribonucleoprotein 27C	; heterogeneous nuclear ribonucleoprotein 27C|AUGUSTUS-3.0.2_31430|GLEAN_16214|GLEAN_16215|Heterogeneous nuclear ribonucleoprotein 27C-like Protein
1509	LOC654871	2.25408	0.00762943	TcasGA2_TC014074	katanin p80 WD40 repeat-containing subunit B1	; katanin p80 WD40 repeat-containing subunit B1|AUGUSTUS-3.0.2_34689|GLEAN_14074|Katanin p80 WD40 repeat-containing subunit B1-like protein
1510	LOC655355	2.25273	0.0483921	TcasGA2_TC007507	breast cancer metastasis-suppressor 1-like protein	; breast cancer metastasis-suppressor 1-like protein|AUGUSTUS-3.0.2_07507|GLEAN_07507
1511	LOC660767	2.25236	6.46347e-05	TcasGA2_TC008033	uncharacterized LOC660767	; uncharacterized protein LOC660767|GLEAN_08033
1512	LOC100142477	2.24902	0.00826784	TcasGA2_TC008244	E3 ubiquitin-protein ligase TTC3	; E3 ubiquitin-protein ligase TTC3|uncharacterized protein LOC100142477|AUGUSTUS-3.0.2_08244|GLEAN_08244|beta-taxilin-like
1513	LOC663894	2.24875	8.81957e-07	TcasGA2_TC000874	V-type proton ATPase subunit F	; V-type proton ATPase subunit F|AUGUSTUS-3.0.2_00874|GLEAN_00874|V-type proton ATPase subunit F 1-like Protein
1514	LOC658995	2.24783	0.000903978	TcasGA2_TC000603	sorting nexin-4	; sorting nexin-4|AUGUSTUS-3.0.2_00603|GLEAN_00603|Sorting nexin-4-like Protein
1515	LOC103313372	2.24767	0.000209024	TcasGA2_TC015521	cytochrome b561	; cytochrome b561|Cytochrome b561-like Protein|GLEAN_15521
1516	LOC661100	2.24602	0.00291463	TcasGA2_TC013156	ras-related and estrogen-regulated growth inhibitor-like protein	; ras-related and estrogen-regulated growth inhibitor-like protein|GLEAN_13156
1517	LOC657743	2.24602	3.04423e-13	TcasGA2_TC034146	sodium-independent sulfate anion transporter	; sodium-independent sulfate anion transporter|AUGUSTUS-3.0.2_34146|Sodium-independent sulfate anion transporter-like Protein
1518	LOC659832	2.24588	0.000810002	TcasGA2_TC013595	uncharacterized LOC659832	; uncharacterized protein LOC659832|AUGUSTUS-3.0.2_13595|GLEAN_13595
1519	LOC661843	2.24535	4.75798e-09	TcasGA2_TC014536	endoplasmic reticulum metallopeptidase 1	; endoplasmic reticulum metallopeptidase 1|AUGUSTUS-3.0.2_14536|Endoplasmic reticulum metallopeptidase 1-like Protein|GLEAN_14536
1520	LOC660811	2.2448	5.93158e-10	TcasGA2_TC000583	b(0,+)-type amino acid transporter 1	; b(0,+)-type amino acid transporter 1|AUGUSTUS-3.0.2_00583|GLEAN_00583|b(0,+)-type amino acid transporter 1-like Protein
1521	LOC656017	2.24394	0.0232882	TcasGA2_TC014255, TcSRC	nuclear receptor coactivator 1	; nuclear receptor coactivator 1|nuclear receptor coactivator 2|GLEAN_14255|GLEAN_14256|steroid receptor co-activator
1522	LOC656630	2.24259	0.00947302	TcasGA2_TC001920	phospholipase A-2-activating protein	; phospholipase A-2-activating protein|AUGUSTUS-3.0.2_01920|GLEAN_01920|Phospholipase A-2-activating protein-like Protein
1523	LOC658736	2.24088	1.47886e-06	TcasGA2_TC009872	probable chitinase 2	; probable chitinase 2|AUGUSTUS-3.0.2_09872|GLEAN_09872|putative chitinase 2-like Protein
1524	LOC658726	2.24043	0.00275067	TcasGA2_TC014202	ferrochelatase, mitochondrial	; ferrochelatase, mitochondrial|AUGUSTUS-3.0.2_14202|Ferrochelatase, mitochondrial-like Protein|GLEAN_14202
1525	LOC662391	2.24028	0.00148201	TcasGA2_TC011606	tetratricopeptide repeat protein 17	; tetratricopeptide repeat protein 17|AUGUSTUS-3.0.2_11606|GLEAN_11606
1526	LOC655972	2.23983	8.88178e-16		Niemann-Pick C1 protein	; Niemann-Pick C1 protein|AUGUSTUS-3.0.2_05088|GLEAN_05088|Niemann-Pick C1 protein-like Protein
1527	LOC103314646	2.23907	0.0063214	TcasGA2_TC010815	hypothetical protein	; uncharacterized protein LOC103314646|AUGUSTUS-3.0.2_10815|GLEAN_10815
1528	LOC661284	2.23863	0.0314411	TcasGA2_TC012085	partitioning defective 3 homolog B	; partitioning defective 3 homolog B|partitioning defective 3 homolog|AUGUSTUS-3.0.2_34318|GLEAN_12085|GLEAN_12086|GLEAN_12087
1529	LOC655023	2.23758	2.00763e-07	TcasGA2_TC014543	guanine nucleotide-binding protein G(o) subunit alpha	; guanine nucleotide-binding protein G(o) subunit alpha|GLEAN_14543
1530	LOC663252	2.23749	0.0159822	TcasGA2_TC015193, Tip48, rept, reptin	ruvB-like 2	; ruvB-like 2|AUGUSTUS-3.0.2_15193|GLEAN_15193
1531	LOC661266	2.23718	0.0230507	TcasGA2_TC015065	polycomb complex protein BMI-1-A	; polycomb complex protein BMI-1-A|AUGUSTUS-3.0.2_34738|GLEAN_15065|Polycomb complex protein BMI-1-like protein
1532	LOC658512	2.23714	0.00417144	TcasGA2_TC008710	carboxylesterase 1E	; carboxylesterase 1E|AUGUSTUS-3.0.2_33863|AUGUSTUS-3.0.2_33864|Acetylcholinesterase-like Protein|Esterase-6-like Protein|GLEAN_08710
1533	LOC659987	2.23413	0.0026213	TcasGA2_TC015078	ubiquitin carboxyl-terminal hydrolase 32	; ubiquitin carboxyl-terminal hydrolase 32|AUGUSTUS-3.0.2_33410|GLEAN_15078|Ubiquitin carboxyl-terminal hydrolase 32-like Protein
1534	LOC657003	2.23118	0.0168879	TcasGA2_TC001102	syntaxin-binding protein 5	; syntaxin-binding protein 5|AUGUSTUS-3.0.2_32168|AUGUSTUS-3.0.2_32169|AUGUSTUS-3.0.2_32170|GLEAN_01102|Lethal(2) giant larvae protein-like Protein|Syntaxin-binding protein 5-like Protein
1535	LOC658275	2.23079	0.0464905	TcasGA2_TC003968	beta-1,3-galactosyltransferase 5	; beta-1,3-galactosyltransferase 5|AUGUSTUS-3.0.2_03968|GLEAN_03968|Lactosylceramide 1,3-N-acetyl-beta-D-glucosaminyltransferase-like Protein
1536	LOC656364	2.22977	0.0187696	TcasGA2_TC009781	F-box/LRR-repeat protein 21	; F-box/LRR-repeat protein 21|AUGUSTUS-3.0.2_09781|F-box only protein 33|GLEAN_09781
1537	LOC663295	2.22973	0.000596593	TcasGA2_TC009661	tRNA selenocysteine 1-associated protein 1	; tRNA selenocysteine 1-associated protein 1|AUGUSTUS-3.0.2_09661|GLEAN_09661|Polyadenylate-binding protein-like Protein
1538	LOC100142223	2.22845	0.000180374	TcasGA2_TC012182	protein FAM45A	; protein FAM45A|AUGUSTUS-3.0.2_12182|GLEAN_12182|Protein FAM45A-like Protein
1539	LOC660540	2.22656	2.95833e-07	TcasGA2_TC013521	long-chain fatty acid transport protein 4	; long-chain fatty acid transport protein 4|GLEAN_13521
1540	LOC660309	2.22636	0.00132626	TcasGA2_TC006125	Krueppel-like factor 8	; Krueppel-like factor 8|AUGUSTUS-3.0.2_33960|GLEAN_06125|GLEAN_06126|Krueppel-like factor 5
1541	LOC659262	2.22558	0.00949094	TcasGA2_TC006746	deoxyhypusine hydroxylase	; deoxyhypusine hydroxylase|AUGUSTUS-3.0.2_06746|Deoxyhypusine hydroxylase-like Protein|GLEAN_06746
1542	LOC658957	2.22515	0.0220027	TcasGA2_TC006282	geminin	; geminin|similar to geminin|AUGUSTUS-3.0.2_06282|GLEAN_06282|Geminin-like Protein
1543	LOC656444	2.22484	0.000716472	TcasGA2_TC009391	glutathione synthetase	; glutathione synthetase|AUGUSTUS-3.0.2_09391|GLEAN_09391|Glutathione synthetase-like Protein
1544	LOC661203	2.22453	1.20055e-08	TcasGA2_TC003997	HIG1 domain family member 1A, mitochondrial	; HIG1 domain family member 1A, mitochondrial|GLEAN_03997|HIG1 domain family member 1A, mitochondrial-like Protein
1545	LOC657260	2.2241	0.00154983	TcasGA2_TC013624	la-related protein 1	; la-related protein 1|AUGUSTUS-3.0.2_13624|GLEAN_13624
1546	LOC656450	2.22256	0.00552317	TcasGA2_TC005959	arginyl-tRNA--protein transferase 1	; arginyl-tRNA--protein transferase 1|AUGUSTUS-3.0.2_05959|Arginyl-tRNA--protein transferase 1-like Protein|GLEAN_05959
1547	LOC662255	2.22237	2.43984e-06	TcasGA2_TC013657	uncharacterized LOC662255	; uncharacterized protein LOC662255|AUGUSTUS-3.0.2_13657|GLEAN_13657
1548	LOC659326	2.22188	0.0419058	TcasGA2_TC015781	elongator complex protein 1	; elongator complex protein 1|AUGUSTUS-3.0.2_15781|GLEAN_15781|Putative elongator complex protein 1-like Protein
1549	LOC660935	2.22039	1.66188e-06	TcasGA2_TC015230	alpha-esterase like protein E3	; alpha-esterase like protein E3|AUGUSTUS-3.0.2_15230|Esterase-6-like Protein|GLEAN_15230
1550	LOC663177	2.21984	0.00158129	TcasGA2_TC014056	tetratricopeptide repeat protein 14 homolog	; tetratricopeptide repeat protein 14 homolog|AUGUSTUS-3.0.2_14056|GLEAN_14056
1551	LOC659699	2.21919	4.26598e-09	TcasGA2_TC011343	mitochondrial-processing peptidase subunit alpha	; mitochondrial-processing peptidase subunit alpha|AUGUSTUS-3.0.2_11343|GLEAN_11343|Mitochondrial-processing peptidase subunit alpha-like Protein
1552	LOC656083	2.21812	0.00133534	TcasGA2_TC003669	28S ribosomal protein S35, mitochondrial	; 28S ribosomal protein S35, mitochondrial|28S ribosomal protein S35, mitochondrial-like Protein|AUGUSTUS-3.0.2_03669|GLEAN_03669
1553	LOC663018	2.2175	0.00126855	TcasGA2_TC014319	tetratricopeptide repeat protein 19 homolog, mitochondrial	; tetratricopeptide repeat protein 19 homolog, mitochondrial|GLEAN_14319
1554	LOC662293	2.2171	0.000356053	TcasGA2_TC008294	WD repeat-containing protein 26	; WD repeat-containing protein 26|AUGUSTUS-3.0.2_08294|GLEAN_08294|WD repeat-containing protein 26 homolog-like Protein
1555	LOC662244	2.21594	0.000118071	TcasGA2_TC010464	F-box/SPRY domain-containing protein 1	; F-box/SPRY domain-containing protein 1|AUGUSTUS-3.0.2_10464|F-box/SPRY domain-containing protein 1-like Protein|GLEAN_10464
1556	LOC662467	2.21503	0.00440012	TcasGA2_TC003180	prostaglandin E synthase 2	; prostaglandin E synthase 2|AUGUSTUS-3.0.2_03180|GLEAN_03180|Prostaglandin E synthase 2-like Protein
1557	LOC659034	2.21287	4.06764e-05	TcasGA2_TC012430	CAP-Gly domain-containing linker protein 1	; CAP-Gly domain-containing linker protein 1|AUGUSTUS-3.0.2_34332|GLEAN_12430|GLEAN_12431
1558	LOC661847	2.21204	0.00321779	TcasGA2_TC030688	gamma-aminobutyric acid receptor-associated protein	; gamma-aminobutyric acid receptor-associated protein|AUGUSTUS-3.0.2_30688|GLEAN_15729-OG23899|Gamma-aminobutyric acid receptor-associated protein-like Protein
1559	LOC103313400	2.21153	0.00864932	TcasGA2_TC033409	uncharacterized LOC103313400	; uncharacterized protein LOC103313400|AUGUSTUS-3.0.2_33409
1560	LOC661917	2.21148	0.0146136	TcasGA2_TC000412	abl interactor 2	; abl interactor 2|AUGUSTUS-3.0.2_00412|Abl interactor 2-like Protein|GLEAN_00412
1561	LOC659138	2.20953	9.84832e-09		bifunctional 3'-phosphoadenosine 5'-phosphosulfate synthase	; bifunctional 3'-phosphoadenosine 5'-phosphosulfate synthase|AUGUSTUS-3.0.2_10318|Bifunctional 3'-phosphoadenosine 5'-phosphosulfate synthase-like Protein|GLEAN_10318
1562	LOC658827	2.20918	0.02987	TcasGA2_TC012925	1,2-dihydroxy-3-keto-5-methylthiopentene dioxygenase	; 1,2-dihydroxy-3-keto-5-methylthiopentene dioxygenase|1,2-dihydroxy-3-keto-5-methylthiopentene dioxygenase-like Protein|AUGUSTUS-3.0.2_12925|GLEAN_12925
1563	LOC655278	2.20872	2.64763e-06	TcasGA2_TC014542	ran-binding protein 9	; ran-binding protein 9|GLEAN_14542
1564	LOC103312344	2.20794	3.13353e-09	TcasGA2_TC034942	plasminogen-like	; plasminogen-like|AUGUSTUS-3.0.2_34942
1565	LOC657813	2.20606	0.0444114	TcasGA2_TC009430	uncharacterized LOC657813	; uncharacterized protein LOC657813|AUGUSTUS-3.0.2_09430|GLEAN_09430
1566	LOC103313021	2.20508	0.015474	TcasGA2_TC031804	uncharacterized LOC103313021	; uncharacterized protein LOC103313021|AUGUSTUS-3.0.2_31804
1567	LOC664036	2.20499	2.88658e-15	TcasGA2_TC009965	ras-related protein Rab-1A	; ras-related protein Rab-1A|AUGUSTUS-3.0.2_09965|GLEAN_09965|Ras-related protein Rab-3-like Protein
1568	LOC660190	2.20488	0.0166919	TcasGA2_TC030614	F-actin-capping protein subunit beta	; F-actin-capping protein subunit beta|AUGUSTUS-3.0.2_30614|F-actin-capping protein subunit beta-like Protein|GLEAN_06343-OG15466
1569	LOC103314605	2.20371	0.00644895	TcasGA2_TC004013	MIP18 family protein CG7949	; MIP18 family protein CG7949|transmembrane protein 234 homolog|AUGUSTUS-3.0.2_04013|AUGUSTUS-3.0.2_32684|GLEAN_04013|MIP18 family protein CG7949-like Protein|Transmembrane protein 234 homolog-like Protein
1570	LOC658794	2.20328	0.0427647	TcasGA2_TC014203	leishmanolysin-like peptidase	; leishmanolysin-like peptidase|AUGUSTUS-3.0.2_14203|GLEAN_14203
1571	LOC661146	2.20281	3.68594e-14	TcasGA2_TC007780	acyl-CoA:lysophosphatidylglycerol acyltransferase 1	; acyl-CoA:lysophosphatidylglycerol acyltransferase 1|AUGUSTUS-3.0.2_07780|AUGUSTUS-3.0.2_07781|Acyl-CoA:lysophosphatidylglycerol acyltransferase 1-like Protein|GLEAN_07780|GLEAN_07781
1572	LOC654893	2.20275	0.0437534	TcasGA2_TC012458	UPF0704 protein C6orf165 homolog	; UPF0704 protein C6orf165 homolog|AUGUSTUS-3.0.2_12458|GLEAN_12458|UPF0704 protein C6orf165 homolog-like Protein
1573	LOC655338	2.19959	2.58498e-05	TcasGA2_TC001201	ER membrane protein complex subunit 2	; ER membrane protein complex subunit 2|AUGUSTUS-3.0.2_01201|ER membrane protein complex subunit 2-like Protein|GLEAN_01201
1574	LOC664218	2.19921	0.00249505	TcasGA2_TC008129	N-alpha-acetyltransferase 30	; N-alpha-acetyltransferase 30|AUGUSTUS-3.0.2_08129|GLEAN_08129|N-alpha-acetyltransferase 30-like Protein
1575	LOC103312363	2.19868	0.0469508	TcasGA2_TC002885	uncharacterized LOC103312363	; uncharacterized protein LOC103312363|AUGUSTUS-3.0.2_32414|GLEAN_02885|GLEAN_02886
1576	LOC103313670	2.19849	0.00061387	TcasGA2_TC008956	enhancer of polycomb homolog 1	; enhancer of polycomb homolog 1|AUGUSTUS-3.0.2_08956|Enhancer of polycomb homolog 2-like Protein|GLEAN_08956
1577	LOC657744	2.19824	0.026644		beta-glucuronidase-like	; beta-glucuronidase-like
1578	LOC659437	2.19794	2.17811e-05	TcasGA2_TC004499	synaptic vesicular amine transporter	; synaptic vesicular amine transporter|AUGUSTUS-3.0.2_04499|GLEAN_04499|Vesicular acetylcholine transporter-like Protein
1579	LOC656575	2.19746	0.0003998	TcasGA2_TC011023	cysteine--tRNA ligase, cytoplasmic	; cysteine--tRNA ligase, cytoplasmic|AUGUSTUS-3.0.2_11023|Cysteine--tRNA ligase, cytoplasmic-like Protein|GLEAN_11023
1580	LOC655530	2.1971	0.00156915	TcasGA2_TC015359	phosphorylase b kinase gamma catalytic chain, skeletal muscle/heart isoform	; phosphorylase b kinase gamma catalytic chain, skeletal muscle/heart isoform|AUGUSTUS-3.0.2_15359|Calcium/calmodulin-dependent protein kinase type II alpha chain-like Protein|GLEAN_15359
1581	LOC100142270	2.19685	8.67882e-10	TcasGA2_TC000511	DNA-directed RNA polymerase II subunit RPB1	; DNA-directed RNA polymerase II subunit RPB1|AUGUSTUS-3.0.2_00511|GLEAN_00511
1582	LOC658706	2.19587	2.92988e-12	TcasGA2_TC011197	tolloid-like protein 1	; tolloid-like protein 1|AUGUSTUS-3.0.2_34615|Dorsal-ventral patterning protein tolloid -like protein|GLEAN_11197
1583	LOC661295	2.19519	6.64641e-05		USP6 N-terminal-like protein	; USP6 N-terminal-like protein|AUGUSTUS-3.0.2_06994|GLEAN_06994
1584	LOC662427	2.19515	4.44089e-16	TcasGA2_TC010468	fibronectin type-III domain-containing protein 3A	; fibronectin type-III domain-containing protein 3A|AUGUSTUS-3.0.2_33105|Fibronectin type-III domain-containing protein 3a-like Protein|GLEAN_10468|GLEAN_10469
1585	LOC663911	2.19276	0.00382598	TcasGA2_TC005721	ankyrin-3	; ankyrin-3|AUGUSTUS-3.0.2_05721|GLEAN_05721
1586	LOC657966	2.1903	0.0133333	TcasGA2_TC014621	transforming growth factor-beta-induced protein ig-h3	; transforming growth factor-beta-induced protein ig-h3|GLEAN_14621|periostin
1587	LOC659012	2.18938	3.90423e-05	TcasGA2_TC014498	flexible cuticle protein 12	; flexible cuticle protein 12|GLEAN_14498
1588	LOC659734	2.18699	0.010627	TcasGA2_TC033702	patellin-5	; biorientation of chromosomes in cell division protein 1-like 1|patellin-5|titin|uncharacterized protein LOC659734|ABC transporter F family member 4|AUGUSTUS-3.0.2_33702
1589	LOC662385	2.18616	0.00864721	TcasGA2_TC006374	ketimine reductase mu-crystallin	; ketimine reductase mu-crystallin|AUGUSTUS-3.0.2_06374|GLEAN_06374|Ketimine reductase mu-crystallin-like Protein
1590	LOC658703	2.18405	0.000187872	TcasGA2_TC004609	catenin alpha	; catenin alpha|similar to CG17947-PA|AUGUSTUS-3.0.2_04609|Catenin alpha-like Protein|GLEAN_04609
1591	LOC659288	2.18403	0.0182316	TcasGA2_TC007466	ATP-binding cassette sub-family G member 4	; ATP-binding cassette sub-family G member 4|AUGUSTUS-3.0.2_07466|GLEAN_07466|Protein white-like Protein
1592	LOC663420	2.18368	0.0462281	TcasGA2_TC014701	membrane metallo-endopeptidase-like 1	; membrane metallo-endopeptidase-like 1|GLEAN_14701
1593	LOC103312320	2.18295	4.18465e-05		uncharacterized LOC103312320	; uncharacterized protein LOC103312320
1594	Ecr	2.18256	0.0285168	TcasGA2_TC012112, ECR-A, ECR-B, NR1H1	ecdysone receptor	; ecdysone receptor|AUGUSTUS-3.0.2_34305|Ecdysone receptor-like Protein|GLEAN_12112|GLEAN_12113
1595	LOC661552	2.18242	0.000462249	TcasGA2_TC015642	serine palmitoyltransferase 1	; serine palmitoyltransferase 1|AUGUSTUS-3.0.2_15642|GLEAN_15642|Serine palmitoyltransferase 1-like Protein
1596	LOC655697	2.18133	0.000178309	TcasGA2_TC005963	autism susceptibility gene 2 protein	; autism susceptibility gene 2 protein|AUGUSTUS-3.0.2_33984|GLEAN_05963|GLEAN_05965
1597	LOC661765	2.18071	0.000656645	TcasGA2_TC015215	vacuolar protein sorting-associated protein 26B-like	; similar to Vacuolar protein sorting 26 homolog (VPS26 protein homolog)|vacuolar protein sorting-associated protein 26B-like|AUGUSTUS-3.0.2_15215|GLEAN_15215|Vacuolar protein sorting-associated protein 26-like Protein
1598	LOC655571	2.18069	0.00889029	TcasGA2_TC001976	uncharacterized LOC655571	; uncharacterized protein LOC655571|AUGUSTUS-3.0.2_01975|AUGUSTUS-3.0.2_01976|Chaoptin-like Protein|GLEAN_01975|GLEAN_01976|Leucine-rich repeat and immunoglobulin-like domain-containing nogo receptor-interacting protein 2
1599	Cpap3-e	2.18016	8.77076e-14	TcasGA2_TC011349	cuticular protein analogous to peritrophins 3-E	; cuticular protein analogous to peritrophins 3-E|AUGUSTUS-3.0.2_11349|Chondroitin proteoglycan 2-like Protein|GLEAN_11349
1600	LOC661984	2.17969	0.0115933	TcasGA2_TC006150	probable ribonuclease ZC3H12B	; probable ribonuclease ZC3H12B|probable ribonuclease ZC3H12D|AUGUSTUS-3.0.2_33971|GLEAN_06150|GLEAN_06151|putative ribonuclease ZC3H12C-like Protein
1601	LOC660298	2.17827	1.06126e-07	TcasGA2_TC013168	60S ribosomal protein L4	; 60S ribosomal protein L4|GLEAN_13168
1602	LOC657069	2.1781	0.0395416	TcasGA2_TC011263	parafibromin	; parafibromin|AUGUSTUS-3.0.2_11263|GLEAN_11263|Parafibromin-like Protein
1603	LOC655245	2.17739	0.00151702	TcasGA2_TC015978	aldehyde dehydrogenase, dimeric NADP-preferring	; aldehyde dehydrogenase, dimeric NADP-preferring|AUGUSTUS-3.0.2_15978|Aldehyde dehydrogenase, dimeric NADP-preferring-like Protein|GLEAN_15978
1604	LOC662148	2.17721	0.010043	TcasGA2_TC007443	TIP41-like protein	; TIP41-like protein|AUGUSTUS-3.0.2_07443|GLEAN_07443
1605	LOC663532	2.17689	0.00324775	TcasGA2_TC014436	ras-related protein Rab-30	; ras-related protein Rab-30|GLEAN_14436
1606	LOC655279	2.17568	0.00615998	TcasGA2_TC013060, kinesin-6A	kinesin 6A	; aspartate--tRNA ligase, mitochondrial|AUGUSTUS-3.0.2_13060|Aspartate--tRNA ligase, mitochondrial-like Protein
1607	LOC659960	2.17532	0.0104319	TcasGA2_TC004493	major facilitator superfamily domain-containing protein 6-A	; major facilitator superfamily domain-containing protein 6-A|AUGUSTUS-3.0.2_04493|GLEAN_04493
1608	LOC664573	2.17416	0.0023715	TcasGA2_TC010049, Ndufs4	NADH dehydrogenase (ubiquinone) Fe-S protein 4	; NADH dehydrogenase [ubiquinone] iron-sulfur protein 4, mitochondrial|AUGUSTUS-3.0.2_10049|GLEAN_10049
1609	LOC661794	2.17366	0.0032232	TcasGA2_TC030724	elongation factor G, mitochondrial	; elongation factor G, mitochondrial|AUGUSTUS-3.0.2_30724|Elongation factor G, mitochondrial-like Protein|GLEAN_14036-OG3918
1610	LOC658882	2.17311	0.00803999	TcasGA2_TC008706	V-type proton ATPase subunit G	; V-type proton ATPase subunit G|AUGUSTUS-3.0.2_08706|GLEAN_08706|V-type proton ATPase subunit G-like Protein
1611	LOC658386	2.17303	0.018037	TcasGA2_TC000027	uncharacterized LOC658386	; uncharacterized protein LOC658386|AUGUSTUS-3.0.2_00027|GLEAN_00027
1612	LOC659146	2.17223	0.0190424	TcasGA2_TC004501	transcription elongation regulator 1	; transcription elongation regulator 1|AUGUSTUS-3.0.2_04501|GLEAN_04501|Transcription elongation regulator 1-like Protein
1613	LOC658383	2.17048	0.0402208	TcasGA2_TC010500	uncharacterized LOC658383	; uncharacterized protein LOC658383|AUGUSTUS-3.0.2_10500|G-protein coupled receptor family C group 5 member C|GLEAN_10500|Metabotropic glutamate receptor 3-like Protein
1614	LOC662874	2.17037	0.0150956	TcasGA2_TC013742, Myo7B	myosin 7B	; myosin-VIIa|AUGUSTUS-3.0.2_13742|GLEAN_13742|Myosin-VIIa-like Protein
1615	LOC661653	2.16962	0.0494555	TcasGA2_TC006302	rap1 GTPase-activating protein 1	; rap1 GTPase-activating protein 1|AUGUSTUS-3.0.2_06302|AUGUSTUS-3.0.2_34036|GLEAN_06302|GLEAN_06305|Rap1 GTPase-activating protein 1-like Protein
1616	LOC657404	2.1693	0.0142658	TcasGA2_TC003854	HBS1-like protein	; HBS1-like protein|AUGUSTUS-3.0.2_03854|Elongation factor 1-alpha 2-like Protein|GLEAN_03854
1617	LOC657826	2.16875	0.0333995	TcasGA2_TC012253	multidrug resistance-associated protein 1	; multidrug resistance-associated protein 1|AUGUSTUS-3.0.2_12253|GLEAN_12253|putative multidrug resistance-associated protein lethal(2)03659-like Protein
1618	LOC663555	2.16825	0.0169765	TcasGA2_TC034407	26S proteasome non-ATPase regulatory subunit 11	; 26S proteasome non-ATPase regulatory subunit 11|26S proteasome non-ATPase regulatory subunit 11-like Protein|AUGUSTUS-3.0.2_34407
1619	LOC656633	2.16579	0.000409106	TcasGA2_TC002139	CCAAT/enhancer-binding protein zeta	; CCAAT/enhancer-binding protein zeta|AUGUSTUS-3.0.2_02139|CCAAT/enhancer-binding protein zeta-like Protein|GLEAN_02139
1620	LOC657652	2.16549	0.0359003	TcasGA2_TC013220, CadN, cadherin-N	neural-cadherin	; neural-cadherin|DN cadherin-like protein|GLEAN_13220|GLEAN_13221|GLEAN_13225|GLEAN_13226|GLEAN_13227
1621	LOC660197	2.16416	2.83061e-06	TcasGA2_TC011938	elongation of very long chain fatty acids protein AAEL008004	; elongation of very long chain fatty acids protein AAEL008004|AUGUSTUS-3.0.2_11938|Elongation of very long chain fatty acids protein AAEL008004-like Protein|GLEAN_11938
1622	LOC663522	2.1608	8.68034e-05	TcasGA2_TC000537	glucosidase 2 subunit beta	; glucosidase 2 subunit beta|AUGUSTUS-3.0.2_00537|GLEAN_00537
1623	LOC657131	2.16019	0.00696318	TcasGA2_TC002215	ubiquitin carboxyl-terminal hydrolase 30 homolog	; ubiquitin carboxyl-terminal hydrolase 30 homolog|AUGUSTUS-3.0.2_02215|GLEAN_02215|Ubiquitin carboxyl-terminal hydrolase 30-like Protein
1624	LOC103313132	2.15675	0.0136894	TcasGA2_TC013273	uncharacterized LOC103313132	; uncharacterized protein LOC103313132|GLEAN_13273
1625	LOC100142107	2.15668	0.0107555	TcasGA2_TC006727	uncharacterized LOC100142107	; LOW QUALITY PROTEIN: uncharacterized protein LOC100142107|AUGUSTUS-3.0.2_06727|GLEAN_06727|mucin-17
1626	LOC658054	2.15432	0.00873041	TcasGA2_TC009432	ubiquitin-conjugating enzyme E2 R2	; ubiquitin-conjugating enzyme E2 R2|AUGUSTUS-3.0.2_09432|GLEAN_09432|Ubiquitin-conjugating enzyme E2-17 kDa-like Protein
1627	LOC103314516	2.15419	0.0244621		transmembrane protein 199	; transmembrane protein 199
1628	LOC656815	2.15415	0.00186375		mitochondrial inner membrane protein OXA1L	; mitochondrial inner membrane protein OXA1L|GLEAN_01816
1629	LOC662143	2.15343	0.00255455	TcasGA2_TC001148	39S ribosomal protein L32, mitochondrial	; 39S ribosomal protein L32, mitochondrial|39S ribosomal protein L32, mitochondrial-like Protein|AUGUSTUS-3.0.2_01148|GLEAN_01148
1630	LOC659522	2.15339	0.00210393	TcasGA2_TC014632	MIF4G domain-containing protein	; MIF4G domain-containing protein|GLEAN_14632
1631	LOC661798	2.1532	0.0144835	TcasGA2_TC014398	uncharacterized LOC661798	; uncharacterized protein LOC661798|GLEAN_14398
1632	LOC657679	2.15192	0.0316888	TcasGA2_TC001672	pancreatic triacylglycerol lipase	; pancreatic triacylglycerol lipase|AUGUSTUS-3.0.2_34287|GLEAN_01672|Pancreatic triacylglycerol lipase-like Protein
1633	LOC663061	2.15086	0.00300163	TcasGA2_TC014460	uncharacterized LOC663061	; uncharacterized protein LOC663061|GLEAN_14460|clc-like protein 2
1634	LOC658164	2.14975	0.00950559		nedd8-activating enzyme E1 catalytic subunit	; nedd8-activating enzyme E1 catalytic subunit|AUGUSTUS-3.0.2_04234|GLEAN_04234|Nedd8-activating enzyme E1 catalytic subunit-like Protein
1635	LOC662949	2.14945	0.0441097	TcasGA2_TC005344	speckle-type POZ protein-like B	; speckle-type POZ protein-like B|AUGUSTUS-3.0.2_05344|GLEAN_05344|TD and POZ domain-containing protein 3-like Protein|speckle-type POZ protein-like A
1636	LOC659398	2.1486	1.1095e-06	TcasGA2_TC009268	RNA-binding protein fusilli	; RNA-binding protein fusilli|AUGUSTUS-3.0.2_09268|AUGUSTUS-3.0.2_09269|GLEAN_09268|GLEAN_09269|RNA-binding protein fusilli-like Protein
1637	LOC657278	2.14817	0.000239907	TcasGA2_TC009208	hypothetical protein	; uncharacterized protein LOC657278|AUGUSTUS-3.0.2_09208|GLEAN_09208
1638	LOC656313	2.14545	7.54945e-08		acyl-CoA Delta(11) desaturase	; acyl-CoA Delta(11) desaturase|AUGUSTUS-3.0.2_14819|Acyl-CoA Delta(11) desaturase-like Protein|GLEAN_14819|fatty acid desaturase D7
1639	LOC659455	2.14491	0.00865505	TcasGA2_TC008263, kinesin-5D	kinesin 5D	; pre-mRNA cleavage complex 2 protein Pcf11|AUGUSTUS-3.0.2_08263|GLEAN_08263
1640	LOC660930	2.14474	0.00116318	TcasGA2_TC014024	TBC1 domain family member 24	; TBC1 domain family member 24|AUGUSTUS-3.0.2_14024|GLEAN_14024|TBC1 domain family member 24-like Protein
1641	LOC662107	2.14337	0.00203793	TcasGA2_TC000408	decaprenyl-diphosphate synthase subunit 1	; decaprenyl-diphosphate synthase subunit 1|AUGUSTUS-3.0.2_00408|Decaprenyl-diphosphate synthase subunit 1-like Protein|GLEAN_00408
1642	LOC658307	2.14177	0.0193341	TcasGA2_TC010355, GLEAN_10355	glutathione peroxidase	; glutathione peroxidase|AUGUSTUS-3.0.2_10355|Phospholipid hydroperoxide glutathione peroxidase, mitochondrial-like Protein
1643	LOC103314965	2.14049	3.24825e-05		UNC93-like protein	; UNC93-like protein|AUGUSTUS-3.0.2_01814|GLEAN_01814
1644	LOC663192	2.14048	0.018595	TcasGA2_TC011782	ribosome maturation protein SBDS	; ribosome maturation protein SBDS|AUGUSTUS-3.0.2_11782|GLEAN_11782|Ribosome maturation protein SBDS-like Protein
1645	LOC103314138	2.13752	5.96316e-06	TcasGA2_TC005348	voltage-dependent T-type calcium channel subunit alpha-1G	; voltage-dependent T-type calcium channel subunit alpha-1G|AUGUSTUS-3.0.2_34186|AUGUSTUS-3.0.2_34187|AUGUSTUS-3.0.2_34189|GLEAN_05348|GLEAN_05355|Voltage-dependent calcium channel type A subunit alpha-1-like Protein
1646	LOC657124	2.13645	0.0411619	TcasGA2_TC012418	vacuolar protein sorting-associated protein 51 homolog	; vacuolar protein sorting-associated protein 51 homolog|AUGUSTUS-3.0.2_12418|GLEAN_12418|Vacuolar protein sorting-associated protein 51 homolog-like Protein
1647	LOC661485	2.13621	0.0214967	TcasGA2_TC030949	hypothetical protein	; uncharacterized protein LOC661485|AUGUSTUS-3.0.2_16256|AUGUSTUS-3.0.2_30949|GLEAN_16255|GLEAN_16256
1648	LOC660619	2.13445	0.0100994	TcasGA2_TC005465	serine/threonine-protein kinase S6KL	; serine/threonine-protein kinase S6KL|AUGUSTUS-3.0.2_05467|AUGUSTUS-3.0.2_31289|GLEAN_05465|GLEAN_05467|RAC serine/threonine-protein kinase-like Protein
1649	LOC657694	2.13312	0.0299174	TcasGA2_TC000319	hexokinase type 2	; hexokinase type 2|AUGUSTUS-3.0.2_00319|GLEAN_00319|Hexokinase type 2-like Protein
1650	LOC100142410	2.13308	0.0426127	TcasGA2_TC002832	insulin-like growth factor-binding protein complex acid labile subunit	; insulin-like growth factor-binding protein complex acid labile subunit|AUGUSTUS-3.0.2_02832|Chaoptin-like Protein|GLEAN_02832
1651	LOC103312815	2.13303	0.0338809	TcasGA2_TC008314	zinc finger protein 264	; zinc finger and BTB domain-containing protein 49|zinc finger protein 264|AUGUSTUS-3.0.2_08314|GLEAN_08314|Transcription factor Ken-like Protein
1652	LOC657092	2.13186	0.000264776	TcasGA2_TC002617	proton-coupled amino acid transporter 4	; proton-coupled amino acid transporter 1|proton-coupled amino acid transporter 4|AUGUSTUS-3.0.2_02617|GLEAN_02617|Proton-coupled amino acid transporter 1-like Protein
1653	LOC661026	2.13162	0.0229032	TcasGA2_TC002107	calcium/calmodulin-dependent protein kinase kinase 2	; calcium/calmodulin-dependent protein kinase kinase 2|AUGUSTUS-3.0.2_02107|Ovarian-specific serine/threonine-protein kinase Lok-like Protein
1654	LOC660595	2.13008	0.0245754	TcasGA2_TC013836	calcium uniporter protein, mitochondrial	; calcium uniporter protein, mitochondrial|AUGUSTUS-3.0.2_13836|AUGUSTUS-3.0.2_13837|Calcium uniporter protein, mitochondrial-like Protein|GLEAN_13836|GLEAN_13837
1655	LOC658534	2.13003	0.00571243	TcasGA2_TC001758	protein tipE	; protein tipE|AUGUSTUS-3.0.2_01758|GLEAN_01758|Protein tipE-like Protein
1656	LOC654997	2.12926	0.0240047	TcasGA2_TC015531	protein takeout	; protein takeout|AUGUSTUS-3.0.2_15531|GLEAN_15531|Protein takeout-like Protein
1657	LOC655717	2.12904	0.0117442	TcasGA2_TC031766	serine/threonine-protein kinase tousled-like 2	; serine/threonine-protein kinase tousled-like 2|AUGUSTUS-3.0.2_31766|GLEAN_08535|GLEAN_08537|GLEAN_08538
1658	LOC659870	2.1282	0.0319388	TcasGA2_TC005858	sphingomyelin phosphodiesterase	; sphingomyelin phosphodiesterase|AUGUSTUS-3.0.2_05858|GLEAN_05858|Sphingomyelin phosphodiesterase-like Protein
1659	LOC661528	2.12712	9.02914e-05	TcasGA2_TC005164	LIM and calponin homology domains-containing protein 1	; LIM and calponin homology domains-containing protein 1|AUGUSTUS-3.0.2_05164|GLEAN_05164
1660	Ttk	2.12554	0.000504066	TcasGA2_TC013842	tramtrack	; tramtrack|AUGUSTUS-3.0.2_33029|GLEAN_13842|GLEAN_13843|Protein tramtrack, alpha isoform-like Protein
1661	LOC658959	2.12385	0.000436456	TcasGA2_TC005479	putative polypeptide N-acetylgalactosaminyltransferase 9	; putative polypeptide N-acetylgalactosaminyltransferase 9|AUGUSTUS-3.0.2_05479|GLEAN_05479|Putative polypeptide N-acetylgalactosaminyltransferase 9-like Protein
1662	LOC103313029	2.12237	0.0117452	TcasGA2_TC014182	PHD finger protein 23	; PHD finger protein 23|PHD finger protein 23A|GLEAN_14182
1663	LOC655192	2.12185	0	TcasGA2_TC002475	serine/threonine-protein kinase tricorner	; LOW QUALITY PROTEIN: serine/threonine-protein kinase tricorner|AUGUSTUS-3.0.2_32646|GLEAN_02475|Serine/threonine-protein kinase tricorner-like Protein
1664	LOC103313385	2.12107	0.00484559	TcasGA2_TC016310, TcOBP5A	hypothetical protein	; general odorant-binding protein 70|GLEAN_16310
1665	LOC659311	2.12064	4.61888e-05	TcasGA2_TC007628, bmm	brummer	; patanin-like phospholipase domain-containing protein|patatin-like phospholipase domain-containing protein 2|AUGUSTUS-3.0.2_07628|GLEAN_07628|Patatin-like phospholipase domain-containing protein 2
1666	LOC103313582	2.12044	0.0193447	TcasGA2_TC009190	uncharacterized LOC103313582	; uncharacterized protein LOC103313582|AUGUSTUS-3.0.2_09190|GLEAN_09190|probable GPI-anchored adhesin-like protein PGA55
1667	LOC659360	2.11947	0.00235703	TcasGA2_TC004770, P55	serine protease P55	; venom protease|AUGUSTUS-3.0.2_04770|GLEAN_04770
1668	LOC661399	2.11923	0.00944854	TcasGA2_TC030950	glutamyl aminopeptidase	; glutamyl aminopeptidase|AUGUSTUS-3.0.2_30950|GLEAN_16253|GLEAN_16254|Glutamyl aminopeptidase-like Protein|aminopeptidase-like protein
1669	LOC103312848	2.11917	0.00417923	TcasGA2_TC008406	serine/threonine-protein phosphatase PP1-beta catalytic subunit	; serine/threonine-protein phosphatase PP1-beta catalytic subunit|AUGUSTUS-3.0.2_08406|GLEAN_08406|Serine/threonine-protein phosphatase beta isoform-like Protein
1670	LOC660444	2.11803	0.000100831	TcasGA2_TC011682	transmembrane protein 65	; transmembrane protein 65|uncharacterized protein LOC660444|AUGUSTUS-3.0.2_11682|GLEAN_11682|Transmembrane protein 65-like Protein
1671	LOC664425	2.11498	0.0285657	TcasGA2_TC008165	39S ribosomal protein L41, mitochondrial	; 39S ribosomal protein L41, mitochondrial|39S ribosomal protein L41, mitochondrial-like Protein|AUGUSTUS-3.0.2_08165|GLEAN_08165
1672	LOC659344	2.11448	3.68066e-05	TcasGA2_TC031676	ATP-binding cassette sub-family A member 3	; ATP-binding cassette sub-family A member 3|ATP-binding cassette sub-family A member 3-like Protein|AUGUSTUS-3.0.2_31676|GLEAN_02276|GLEAN_02277
1673	LOC657674	2.11414	1.50188e-10	TcasGA2_TC011707, mys	integrin beta-PS	; integrin beta-PS|AUGUSTUS-3.0.2_11707|GLEAN_11707|myospheroid
1674	LOC661543	2.11342	0.020137	TcasGA2_TC007602	DNA oxidative demethylase ALKBH1	; DNA oxidative demethylase ALKBH1|AUGUSTUS-3.0.2_07602|Alkylated DNA repair protein alkB homolog 1-like Protein|GLEAN_07602|alkylated DNA repair protein alkB homolog 1
1675	LOC662769	2.11221	0.00264653	TcasGA2_TC014160	putative tyrosine-protein kinase Wsck	; putative tyrosine-protein kinase Wsck|AUGUSTUS-3.0.2_14160|GLEAN_14160|Putative tyrosine-protein kinase Wsck-like Protein
1676	LOC658344	2.11171	0.0279223	TcasGA2_TC003696	mediator of RNA polymerase II transcription subunit 10	; mediator of RNA polymerase II transcription subunit 10|AUGUSTUS-3.0.2_03696|GLEAN_03696|Mediator of RNA polymerase II transcription subunit 10-like Protein
1677	LOC659412	2.1117	0.0138968	TcasGA2_TC012546	mitochondrial basic amino acids transporter	; mitochondrial basic amino acids transporter|AUGUSTUS-3.0.2_12546|Congested-like trachea protein|GLEAN_12546|mitochondrial carnitine/acylcarnitine carrier protein CACL
1678	LOC659123	2.11106	0.00250336	TcasGA2_TC001765, PlexA	plexin A	; plexin-A2|AUGUSTUS-3.0.2_01765|GLEAN_01765
1679	LOC657591	2.10906	0.0143924	TcasGA2_TC012214	dnaJ homolog subfamily C member 16	; dnaJ homolog subfamily C member 16|AUGUSTUS-3.0.2_12214|DnaJ homolog subfamily C member 16-like Protein|GLEAN_12214
1680	LOC100141883	2.10814	0.000131249	TcasGA2_TC014698	multiple epidermal growth factor-like domains protein 8	; multiple epidermal growth factor-like domains protein 8|GLEAN_14698
1681	LOC656993	2.10768	0.000201251	TcasGA2_TC004380	pyruvate kinase	; pyruvate kinase|AUGUSTUS-3.0.2_04380|GLEAN_04380|Pyruvate kinase-like Protein
1682	LOC656862	2.10768	0.00385681	TcasGA2_TC015817	copper-transporting ATPase 1	; copper-transporting ATPase 1|AUGUSTUS-3.0.2_30914|Copper-transporting ATPase 1-like Protein|GLEAN_15817|GLEAN_15818
1683	LOC107398445	2.10698	0.0208074		uncharacterized LOC107398445
1684	LOC655403	2.10635	0.0104021	TcasGA2_TC015922	adenylosuccinate synthetase	; adenylosuccinate synthetase|AUGUSTUS-3.0.2_34777|Adenylosuccinate synthetase-like protein|GLEAN_15922
1685	LOC661344	2.10405	0.0313594		UDP-glucuronosyltransferase 2B4-like	; UDP-glucuronosyltransferase 2B4-like
1686	LOC100142602	2.1019	0.000266437	TcasGA2_TC009718	lysM and putative peptidoglycan-binding domain-containing protein 2	; lysM and putative peptidoglycan-binding domain-containing protein 2|similar to CG12207 CG12207-PB|AUGUSTUS-3.0.2_09718|GLEAN_09718
1687	LOC657662	2.09815	0.0275461	TcasGA2_TC009793	mediator of RNA polymerase II transcription subunit 16	; mediator of RNA polymerase II transcription subunit 16|AUGUSTUS-3.0.2_09793|GLEAN_09793|Mediator of RNA polymerase II transcription subunit 16-like Protein
1688	LOC658218	2.09584	0.00301001	TcasGA2_TC009798, ik2, ikkb	IKK epsilon	; serine/threonine-protein kinase TBK1|AUGUSTUS-3.0.2_09798|GLEAN_09798
1689	LOC658370	2.09492	6.79483e-05	TcasGA2_TC009118	putative ferric-chelate reductase 1 homolog	; putative ferric-chelate reductase 1 homolog|AUGUSTUS-3.0.2_09118|GLEAN_09118|Putative ferric-chelate reductase 1 homolog-like Protein
1690	LOC103313280	2.09441	0.027565	TcasGA2_TC033244	uncharacterized LOC103313280	; uncharacterized protein LOC103313280|AUGUSTUS-3.0.2_33244|probable G-protein coupled receptor Mth-like 3|putative G-protein coupled receptor Mth-like 3
1691	LOC654939	2.09426	0.0219672	TcasGA2_TC009584	acidic leucine-rich nuclear phosphoprotein 32 family member A	; acidic leucine-rich nuclear phosphoprotein 32 family member A|protein tilB homolog|GLEAN_09584
1692	LOC663845	2.09393	0.000806188	TcasGA2_TC000689, drpr	draper	; multiple epidermal growth factor-like domains protein 10|AUGUSTUS-3.0.2_00689|GLEAN_00689
1693	LOC657843	2.09355	0.00160054	TcasGA2_TC010637	polymerase delta-interacting protein 3	; polymerase delta-interacting protein 3|AUGUSTUS-3.0.2_10637|GLEAN_10637
1694	LOC658328	2.0929	0.0329755	TcasGA2_TC012671	calcium-transporting atpase sarcoplasmic/endoplasmic reticulum type	; calcium-transporting ATPase sarcoplasmic/endoplasmic reticulum type|AUGUSTUS-3.0.2_12671|Calcium-transporting ATPase sarcoplasmic/endoplasmic reticulum type-like Protein|GLEAN_12671
1695	LOC657873	2.092	7.8091e-07	TcasGA2_TC003774	fragile X mental retardation syndrome-related protein 1	; fragile X mental retardation syndrome-related protein 1|AUGUSTUS-3.0.2_03774|Fragile X mental retardation syndrome-related protein 1-like Protein|GLEAN_03774
1696	LOC661812	2.09194	0.0189814	TcasGA2_TC006679	protein Gawky	; protein Gawky|AUGUSTUS-3.0.2_06679|GLEAN_06679
1697	LOC663040	2.09101	3.95926e-07	TcasGA2_TC008474	kelch domain-containing protein 3	; kelch domain-containing protein 3|AUGUSTUS-3.0.2_08474|GLEAN_08474|Host cell factor-like Protein
1698	LOC658815	2.09072	0.00804773	TcasGA2_TC006470	THO complex subunit 1	; THO complex subunit 1|AUGUSTUS-3.0.2_06470|GLEAN_06470|THO complex subunit 1-like Protein
1699	LOC662201	2.09035	0.0291256	TcasGA2_TC006370	6-phosphofructo-2-kinase/fructose-2,6-bisphosphatase	; 6-phosphofructo-2-kinase/fructose-2,6-bisphosphatase|6-phosphofructo-2-kinase/fructose-2,6-bisphosphatase-like Protein|AUGUSTUS-3.0.2_06370|GLEAN_06370
1700	LOC659464	2.09019	0.0218408	TcasGA2_TC014815	heparan-sulfate 6-O-sulfotransferase 2	; heparan-sulfate 6-O-sulfotransferase 2|similar to AGAP001444-PA|GLEAN_14815
1701	LOC661755	2.08983	0.0214138	TcasGA2_TC007705	breast carcinoma-amplified sequence 3 homolog	; breast carcinoma-amplified sequence 3 homolog|AUGUSTUS-3.0.2_07705|Breast carcinoma-amplified sequence 3 homolog-like Protein|GLEAN_07705
1702	LOC656679	2.08829	0.000406833	TcasGA2_TC007497	rab GDP dissociation inhibitor alpha	; rab GDP dissociation inhibitor alpha|AUGUSTUS-3.0.2_07497|GLEAN_07497|Rab proteins geranylgeranyltransferase component A-like Protein
1703	LOC654917	2.08681	0.00393284	TcasGA2_TC003870	alpha-1,3-mannosyl-glycoprotein 4-beta-N-acetylglucosaminyltransferase B	; alpha-1,3-mannosyl-glycoprotein 4-beta-N-acetylglucosaminyltransferase B|AUGUSTUS-3.0.2_03870|Alpha-1,3-mannosyl-glycoprotein 4-beta-N-acetylglucosaminyltransferase B-like Protein|GLEAN_03870
1704	LOC659568	2.08454	0.0087827	TcasGA2_TC000227	uncharacterized LOC659568	; uncharacterized protein LOC659568|AUGUSTUS-3.0.2_00227|GLEAN_00227
1705	LOC659822	2.08403	1.73036e-08	TcasGA2_TC031853	zinc finger protein rotund	; zinc finger protein rotund|AUGUSTUS-3.0.2_31853|GLEAN_16013|GLEAN_16016|GLEAN_16017|GLEAN_16018|Zinc finger protein rotund-like Protein
1706	Usp	2.08087	0.000192337	TcasGA2_TC014027	ultraspiracle nuclear receptor	; ultraspiracle nuclear receptor|AUGUSTUS-3.0.2_14027|GLEAN_14027|GLEAN_14028
1707	LOC658222	2.08013	0.000924566	TcasGA2_TC005658	uncharacterized LOC658222	; uncharacterized protein LOC658222|AUGUSTUS-3.0.2_05658|GLEAN_05658
1708	LOC657188	2.07998	0.00293891	TcasGA2_TC013319	sodium/potassium/calcium exchanger 4	; sodium/potassium/calcium exchanger 4|GLEAN_13319
1709	LOC659402	2.07961	0.0119731	TcasGA2_TC006034	chymotrypsin-C	; chymotrypsin-C|limulus clotting factor C|AUGUSTUS-3.0.2_06034|GLEAN_06034|serine protease P69
1710	LOC659314	2.07883	0.0118079	TcasGA2_TC013913	dnaJ homolog subfamily A member 2	; dnaJ homolog subfamily A member 2|AUGUSTUS-3.0.2_13913|DnaJ homolog subfamily A member 2-like Protein|GLEAN_13913
1711	LOC655930	2.07784	1.48198e-09	TcasGA2_TC003916	UDP-N-acetylglucosamine--peptide N-acetylglucosaminyltransferase 110 kDa subunit	; UDP-N-acetylglucosamine--peptide N-acetylglucosaminyltransferase 110 kDa subunit|AUGUSTUS-3.0.2_03916|GLEAN_03916|UDP-N-acetylglucosamine--peptide N-acetylglucosaminyltransferase 110 kDa subunit-like Protein
1712	LOC662101	2.07729	4.56318e-07	TcasGA2_TC012576	casein kinase I isoform alpha	; casein kinase I isoform alpha|AUGUSTUS-3.0.2_12576|Casein kinase I isoform alpha-like Protein|GLEAN_12576
1713	LOC661139	2.07682	0	TcasGA2_TC000992	succinate dehydrogenase cytochrome b560 subunit, mitochondrial	; succinate dehydrogenase cytochrome b560 subunit, mitochondrial|GLEAN_00992|Succinate dehydrogenase cytochrome b560 subunit, mitochondrial-like Protein
1714	LOC663779	2.07642	0.0327288	TcasGA2_TC009947	armadillo repeat-containing protein 6 homolog	; armadillo repeat-containing protein 6 homolog|AUGUSTUS-3.0.2_09947|Armadillo repeat-containing protein 6 homolog-like Protein|GLEAN_09947
1715	LOC659671	2.07505	0.0302407	TcasGA2_TC012376	leucine-rich repeat flightless-interacting protein 2	; leucine-rich repeat flightless-interacting protein 2|AUGUSTUS-3.0.2_12376|GLEAN_12376|Leucine-rich repeat flightless-interacting protein 2-like Protein
1716	LOC657623	2.07437	0.022578	TcasGA2_TC004615, stau	staufen	; double-stranded RNA-binding protein Staufen homolog 2|AUGUSTUS-3.0.2_04615|GLEAN_04615
1717	LOC659971	2.07428	4.49445e-05	TcasGA2_TC003444	ubiquitin-conjugating enzyme E2-22 kDa	; similar to ubiquitin conjugating enzyme-like protein|ubiquitin-conjugating enzyme E2-22 kDa|AUGUSTUS-3.0.2_03444|GLEAN_03444|Ubiquitin-conjugating enzyme E2-22 kDa-like Protein
1718	LOC655212	2.07269	2.43426e-05	TcasGA2_TC009394	peptidyl-prolyl cis-trans isomerase FKBP8	; peptidyl-prolyl cis-trans isomerase FKBP8|AUGUSTUS-3.0.2_09394|GLEAN_09394|Peptidyl-prolyl cis-trans isomerase FKBP8-like Protein
1719	LOC656602	2.07222	0.0167854	TcasGA2_TC014762	protein mahjong	; LOW QUALITY PROTEIN: protein mahjong|GLEAN_14762
1720	LOC100142319	2.07129	0.00160629	TcasGA2_TC007958	uncharacterized LOC100142319	; uncharacterized protein LOC100142319|AUGUSTUS-3.0.2_07958|GLEAN_07958
1721	LOC656652	2.07008	0.00238476	TcasGA2_TC014761	uncharacterized LOC656652	; similar to CG13024 CG13024-PA|uncharacterized protein LOC656652|GLEAN_14761
1722	LOC656140	2.06957	0.0296974	TcasGA2_TC004140	cytoplasmic FMR1-interacting protein	; cytoplasmic FMR1-interacting protein|similar to CG4931-PA|AUGUSTUS-3.0.2_04140|Cytoplasmic FMR1-interacting protein-like Protein|GLEAN_04140
1723	LOC660206	2.06885	0.0053403	TcasGA2_TC015959	39S ribosomal protein L40, mitochondrial	; 39S ribosomal protein L40, mitochondrial|39S ribosomal protein L40, mitochondrial-like Protein|AUGUSTUS-3.0.2_15959|GLEAN_15959
1724	LOC663454	2.06842	0.0368125	TcasGA2_TC014434	probable cysteine desulfurase, mitochondrial	; probable cysteine desulfurase, mitochondrial|GLEAN_14434
1725	Fz	2.06805	0.000561796	TcasGA2_TC014055, GLEAN_14055	frizzled	; frizzled|AUGUSTUS-3.0.2_14055
1726	LOC662589	2.06798	0.0486202	TcasGA2_TC006514	exocyst complex component 3	; exocyst complex component 3|AUGUSTUS-3.0.2_06514|Exocyst complex component 3-like Protein|GLEAN_06514
1727	LOC103314980	2.06708	0.0044382	TcasGA2_TC004523, P46	uncharacterized LOC103314980	; LOW QUALITY PROTEIN: uncharacterized protein LOC103314980|GLEAN_04523|serine protease P46
1728	LOC664282	2.06554	0.039149	TcasGA2_TC007369	D-beta-hydroxybutyrate dehydrogenase, mitochondrial	; D-beta-hydroxybutyrate dehydrogenase, mitochondrial|AUGUSTUS-3.0.2_07369|D-beta-hydroxybutyrate dehydrogenase, mitochondrial-like Protein|GLEAN_07369
1729	LOC659105	2.06463	0.00512409	TcasGA2_TC009535	longitudinals lacking protein-like	; longitudinals lacking protein-like|AUGUSTUS-3.0.2_09535|GLEAN_09535
1730	LOC658519	2.06359	0.0429157	TcasGA2_TC006278	ribonuclease P protein subunit p20	; ribonuclease P protein subunit p20|AUGUSTUS-3.0.2_06278|GLEAN_06278|Ribonuclease P protein subunit p20-like Protein
1731	LOC664327	2.06286	2.16373e-06	TcasGA2_TC002895	transmembrane protein 135	; transmembrane protein 135|AUGUSTUS-3.0.2_02895|GLEAN_02895|Transmembrane protein 135-like Protein
1732	LOC654959	2.06232	0.00268626	TcasGA2_TC015923	1,5-anhydro-D-fructose reductase	; 1,5-anhydro-D-fructose reductase|1,5-anhydro-D-fructose reductase-like Protein|AUGUSTUS-3.0.2_15923|GLEAN_15923
1733	LOC658192	2.06037	0.0152718	TcasGA2_TC002741	lysosomal alpha-glucosidase	; lysosomal alpha-glucosidase|AUGUSTUS-3.0.2_02741|GLEAN_02741|Lysosomal alpha-glucosidase-like Protein
1734	LOC655072	2.06017	0.0220107	TcasGA2_TC005894	testis-expressed sequence 2 protein	; testis-expressed sequence 2 protein|AUGUSTUS-3.0.2_05894|GLEAN_05894
1735	LOC663438	2.05958	0.0156975	TcasGA2_TC014329	alpha-tocopherol transfer protein-like	; alpha-tocopherol transfer protein-like|AUGUSTUS-3.0.2_14329|GLEAN_14329
1736	LOC107398172	2.05951	0.0236967		sodium-coupled monocarboxylate transporter 1-like	; sodium-coupled monocarboxylate transporter 1-like
1737	LOC103313789	2.0587	7.84509e-05	TcasGA2_TC031272	uncharacterized LOC103313789	; uncharacterized protein LOC103313789|AUGUSTUS-3.0.2_31272
1738	LOC658201	2.05842	2.62626e-07	TcasGA2_TC013803	cytoplasmic protein NCK1	; cytoplasmic protein NCK1|AUGUSTUS-3.0.2_13803|Cytoplasmic protein NCK1-like Protein|GLEAN_13803
1739	LOC657378	2.05777	0.0319496	TcasGA2_TC034217	epidermal growth factor receptor kinase substrate 8-like protein 2	; epidermal growth factor receptor kinase substrate 8-like protein 2|AUGUSTUS-3.0.2_34217|AUGUSTUS-3.0.2_34218|GLEAN_01466|epidermal growth factor receptor kinase substrate 8
1740	LOC664510	2.05546	0.00108969	TcasGA2_TC007298	mitogen-activated protein kinase kinase kinase 11	; mitogen-activated protein kinase kinase kinase 11|AUGUSTUS-3.0.2_07298|AUGUSTUS-3.0.2_07299|AUGUSTUS-3.0.2_32836|GLEAN_07298|GLEAN_07299|Mitogen-activated protein kinase kinase kinase-like Protein
1741	LOC657775	2.05249	6.41485e-05	TcasGA2_TC004368	AN1-type zinc finger protein 6	; AN1-type zinc finger protein 6|AN1-type zinc finger protein 6-like Protein|AUGUSTUS-3.0.2_04368|GLEAN_04368
1742	LOC659663	2.05247	0.000940267	TcasGA2_TC006219	uncharacterized LOC659663	; uncharacterized protein LOC659663|AUGUSTUS-3.0.2_06219|GLEAN_06219
1743	LOC662819	2.05228	0.00705055	TcasGA2_TC007435	RNA cytidine acetyltransferase	; RNA cytidine acetyltransferase|AUGUSTUS-3.0.2_07435|GLEAN_07435|N-acetyltransferase 10|Polycomb protein l(1)G0020-like Protein
1744	LOC656435	2.05142	1.23545e-08	TcasGA2_TC013205	transmembrane 9 superfamily member 4	; transmembrane 9 superfamily member 4|GLEAN_13205
1745	LOC659165	2.05067	0.00506482	TcasGA2_TC007630	radial spoke head 14 homolog	; radial spoke head 14 homolog|AUGUSTUS-3.0.2_32757|AUGUSTUS-3.0.2_32758|GLEAN_07630|Lysoplasmalogenase-like protein TMEM86A|Rhabdoid tumor deletion region protein 1-like Protein|rhabdoid tumor deletion region protein 1
1746	LOC664297	2.04938	0.017134	TcasGA2_TC002899	elongation of very long chain fatty acids protein 1	; elongation of very long chain fatty acids protein 1|AUGUSTUS-3.0.2_02899|Elongation of very long chain fatty acids protein 1-like Protein|GLEAN_02899
1747	LOC107398093	2.04878	6.86653e-06	TcasGA2_TC033445	uncharacterized LOC107398093	; uncharacterized protein LOC107398093|AUGUSTUS-3.0.2_33445|AUGUSTUS-3.0.2_33446|Protein DGCR14 homolog-like Protein|Protein mothers against dpp-like Protein
1748	LOC103312707	2.04817	0.0094153	TcasGA2_TC034658	dnaJ-like protein 60	; dnaJ-like protein 60|AUGUSTUS-3.0.2_34658
1749	LOC655074	2.04724	0.0236183	TcasGA2_TC005682, TRPL, TRPML	transient receptor potential mucolipin	; mucolipin-3|AUGUSTUS-3.0.2_05682|GLEAN_05682
1750	LOC664299	2.04722	2.15803e-06	TcasGA2_TC008140, sgg	shaggy	; glycogen synthase kinase-3 beta|AUGUSTUS-3.0.2_32822|GLEAN_08140|GLEAN_08141|Protein kinase shaggy-like Protein
1751	LOC656468	2.04656	0.018135	TcasGA2_TC015974	uncharacterized LOC656468	; uncharacterized protein LOC656468|GLEAN_15974
1752	LOC659941	2.04635	0.00931986	TcasGA2_TC012379	CD63 antigen	; CD63 antigen|AUGUSTUS-3.0.2_12379|CD63 antigen-like Protein|GLEAN_12379
1753	LOC658240	2.04634	0.0241959		probable small nuclear ribonucleoprotein Sm D1	; probable small nuclear ribonucleoprotein Sm D1|AUGUSTUS-3.0.2_10472|GLEAN_10472|putative small nuclear ribonucleoprotein Sm D1-like Protein
1754	LOC656473	2.0461	0.0197677	TcasGA2_TC004143	FERM domain-containing protein 5	; FERM domain-containing protein 5|AUGUSTUS-3.0.2_04143|GLEAN_04143|Protein 4.1 homolog-like Protein
1755	LOC664561	2.04513	0.0450841	TcasGA2_TC008221	membrane-associated progesterone receptor component 1	; membrane-associated progesterone receptor component 1|AUGUSTUS-3.0.2_08221|GLEAN_08221|Membrane-associated progesterone receptor component 2-like Protein
1756	LOC655675	2.04465	0.00224371	TcasGA2_TC002392	serine/threonine-protein phosphatase 6 regulatory subunit 3	; serine/threonine-protein phosphatase 6 regulatory subunit 3|AUGUSTUS-3.0.2_02392|GLEAN_02392|Serine/threonine-protein phosphatase 6 regulatory subunit 3-like Protein
1757	LOC656187	2.04383	0.00431437	TcasGA2_TC014559	transport and Golgi organization protein 11	; transport and Golgi organization protein 11|GLEAN_14559
1758	LOC656747	2.04372	0.0346154	TcasGA2_TC003674	diphosphoinositol polyphosphate phosphohydrolase 2	; diphosphoinositol polyphosphate phosphohydrolase 2|AUGUSTUS-3.0.2_03674|Diphosphoinositol polyphosphate phosphohydrolase 2-like Protein|GLEAN_03674
1759	LOC662179	2.04345	0.014847	TcasGA2_TC000407	uncharacterized LOC662179	; uncharacterized protein LOC662179|AUGUSTUS-3.0.2_00407|GLEAN_00407|forkhead-associated domain-containing protein 1
1760	LOC656198	2.04256	0.021682	TcasGA2_TC009217	tubulointerstitial nephritis antigen-like	; tubulointerstitial nephritis antigen-like|GLEAN_09217|cathepsin B
1761	LOC655732	2.0425	4.60673e-10	TcasGA2_TC015373, ApoLp-III	apolipophorin-III	; uncharacterized protein LOC655732|AUGUSTUS-3.0.2_15373|GLEAN_15373
1762	LOC662095	2.04224	0.00020624	TcasGA2_TC034008	embryonic protein DC-8	; embryonic protein DC-8|AUGUSTUS-3.0.2_34008|caldesmon
1763	LOC664163	2.04174	6.84306e-05	TcasGA2_TC007534	calcineurin subunit B type 2	; calcineurin subunit B type 2|AUGUSTUS-3.0.2_07534|Calcineurin subunit B type 2-like Protein|GLEAN_07534
1764	LOC660325	2.0411	0.0156032	TcasGA2_TC015888	cytochrome c oxidase subunit 7A1, mitochondrial	; cytochrome c oxidase subunit 7A1, mitochondrial|AUGUSTUS-3.0.2_15888|Cytochrome c oxidase subunit 7A1, mitochondrial-like Protein|GLEAN_15888
1765	LOC658261	2.04105	0.00666303	TcasGA2_TC011294	transmembrane emp24 domain-containing protein 3	; transmembrane emp24 domain-containing protein 3|AUGUSTUS-3.0.2_11294|GLEAN_11294|Transmembrane emp24 domain-containing protein eca-like Protein
1766	LOC661624	2.04008	4.75058e-05	TcasGA2_TC000199	spondin-2	; spondin-2|AUGUSTUS-3.0.2_32264|GLEAN_00199|GLEAN_00201
1767	LOC656356	2.03943	0.000191874	TcasGA2_TC015376	thioredoxin-2	; thioredoxin-2|AUGUSTUS-3.0.2_15376|GLEAN_15376|Thioredoxin-2-like Protein
1768	LOC655576	2.03839	0.000489977	TcasGA2_TC014952	uncharacterized LOC655576	; uncharacterized protein LOC655576|AUGUSTUS-3.0.2_14952|GLEAN_14952
1769	LOC663639	2.03833	0.000524016	TcasGA2_TC030769	dnaJ homolog subfamily C member 1	; dnaJ homolog subfamily C member 1|AUGUSTUS-3.0.2_30769|GLEAN_10179-OG7842
1770	LOC663506	2.03686	0.0440809	TcasGA2_TC002944	28S ribosomal protein S28, mitochondrial	; 28S ribosomal protein S28, mitochondrial|28S ribosomal protein S28, mitochondrial-like Protein|AUGUSTUS-3.0.2_02944|GLEAN_02944
1771	LOC657388	2.03667	8.74566e-05	TcasGA2_TC004758	exostosin-1	; exostosin-1|AUGUSTUS-3.0.2_04758|Exostosin-1-like Protein|GLEAN_04758
1772	LOC664339	2.03627	0.000347262	TcasGA2_TC003547	transmembrane and coiled-coil domains protein 2	; transmembrane and coiled-coil domains protein 2|AUGUSTUS-3.0.2_03548|AUGUSTUS-3.0.2_32408|GLEAN_03547|GLEAN_03548|Transmembrane and coiled-coil domains protein 2-like Protein
1773	LOC664029	2.0349	0.00564079	TcasGA2_TC005714	2-hydroxyacyl-CoA lyase 1	; 2-hydroxyacyl-CoA lyase 1|2-hydroxyacyl-CoA lyase 1-like Protein|AUGUSTUS-3.0.2_05714|GLEAN_05714
1774	LOC659518	2.03479	6.67627e-05	TcasGA2_TC013693	tribbles homolog 2	; tribbles homolog 2|AUGUSTUS-3.0.2_33074|Calcium/calmodulin-dependent protein kinase type II alpha chain-like Protein|GLEAN_13693|GLEAN_13694
1775	LOC103313487	2.03472	0.0293085		uncharacterized LOC103313487	; uncharacterized protein LOC103313487|AUGUSTUS-3.0.2_04254|GLEAN_04254
1776	LOC661261	2.03334	4.48662e-07	TcasGA2_TC014393	major facilitator superfamily domain-containing protein 1	; major facilitator superfamily domain-containing protein 1|similar to CG8602-PA|AUGUSTUS-3.0.2_14393|GLEAN_14393|Major facilitator superfamily domain-containing protein 1-like Protein
1777	LOC663930	2.0328	0.0124362	TcasGA2_TC007397	calnexin	; calnexin|AUGUSTUS-3.0.2_07397|Calreticulin-like Protein|GLEAN_07397
1778	LOC664509	2.03276	0.0424951	TcasGA2_TC030649	enolase-phosphatase E1	; enolase-phosphatase E1|AUGUSTUS-3.0.2_30649|Enolase-phosphatase E1-like Protein|GLEAN_08795-OG18443
1779	LOC658929	2.03203	0.0362362	TcasGA2_TC002548, NR5A3, ftz-f1	nuclear hormone receptor FTZ-F1	; nuclear hormone receptor FTZ-F1|AUGUSTUS-3.0.2_02548|AUGUSTUS-3.0.2_02550|GLEAN_02548|GLEAN_02550|ftz transcription factor 1
1780	LOC657687	2.03123	2.15189e-07	TcasGA2_TC031638	transmembrane protein 161B	; transmembrane protein 161B|AUGUSTUS-3.0.2_31638|Transmembrane protein 161B-like Protein
1781	LOC662314	2.03069	0.0257992	TcasGA2_TC005367	homogentisate 1,2-dioxygenase	; homogentisate 1,2-dioxygenase|AUGUSTUS-3.0.2_05367|GLEAN_05367|Homogentisate 1,2-dioxygenase-like Protein
1782	LOC660570	2.02993	0.00442635	TcasGA2_TC004388, neo18	lethal neo18	; NADH dehydrogenase [ubiquinone] 1 beta subcomplex subunit 5, mitochondrial|AUGUSTUS-3.0.2_04388|GLEAN_04388
1783	LOC663344	2.02985	0.000215174	TcasGA2_TC001033, ANKRD17	ankyrin repeat domain-containing protein 17	; ankyrin repeat domain-containing protein 17|AUGUSTUS-3.0.2_01033|GLEAN_01033|ankyrin repeat domain 17
1784	LOC661520	2.0293	0.0233227	TcasGA2_TC012081	inositol polyphosphate 5-phosphatase OCRL-1	; inositol polyphosphate 5-phosphatase OCRL-1|AUGUSTUS-3.0.2_12081|GLEAN_12081|Inositol polyphosphate 5-phosphatase OCRL-1-like Protein
1785	LOC656924	2.02919	0.0276906	TcasGA2_TC003817	transcription initiation factor TFIID subunit 7	; transcription initiation factor TFIID subunit 7|AUGUSTUS-3.0.2_03817|GLEAN_03817|Transcription initiation factor TFIID subunit 7-like Protein
1786	LOC655028	2.02914	0.00458633	TcasGA2_TC004812	ecdysone-induced protein 74EF	; ecdysone-induced protein 74EF isoform A|ecdysone-induced protein 74EF|AUGUSTUS-3.0.2_04812|AUGUSTUS-3.0.2_31968|Ecdysone-induced protein 74EF isoform B-like Protein|GLEAN_04812|GLEAN_04814|GLEAN_04816
1787	LOC658914	2.02775	6.52174e-08	TcasGA2_TC005398	histone H3.3	; histone H3.3|AUGUSTUS-3.0.2_05398|GLEAN_05398|Histone H3.3-like Protein
1788	Tcjheh-r2	2.02682	0.00578799		juvenile hormone epoxide hydrolase-like protein 2	; juvenile hormone epoxide hydrolase-like protein 2
1789	LOC655600	2.02575	0.000938464	TcasGA2_TC013882	LIM domain-containing protein jub	; LIM domain-containing protein jub|AUGUSTUS-3.0.2_13882|GLEAN_13882|LIM domain-containing protein jub-like Protein
1790	LOC103313002	2.02528	0.0473552	TcasGA2_TC013656	cAMP-dependent protein kinase inhibitor beta	; cAMP-dependent protein kinase inhibitor beta|AUGUSTUS-3.0.2_13656|GLEAN_13656
1791	LOC662472	2.02487	0.00100769	TcasGA2_TC007045	putative E3 ubiquitin-protein ligase UBR7	; putative E3 ubiquitin-protein ligase UBR7|AUGUSTUS-3.0.2_07045|GLEAN_07045|Putative E3 ubiquitin-protein ligase UBR7-like Protein
1792	Arp1	2.02422	4.67118e-09	TcasGA2_TC006296, ACTB	actin related protein 1	; actin related protein 1|AUGUSTUS-3.0.2_06296|Actin-5C-like Protein|GLEAN_06296|beta-actin
1793	LOC664259	2.02406	0.0185209	TcasGA2_TC013062	transmembrane protein 189	; transmembrane protein 189|GLEAN_13062
1794	LOC662106	2.02376	0.00325849	TcasGA2_TC000561	solute carrier family 22 member 21	; solute carrier family 22 member 21|AUGUSTUS-3.0.2_00561|GLEAN_00561|Organic cation transporter protein-like Protein
1795	LOC660568	2.02334	0.000880826	TcasGA2_TC000132	protein sel-5	; protein sel-5|AP2-associated protein kinase 1-like Protein|AUGUSTUS-3.0.2_00132|GLEAN_00132|serine/threonine-protein kinase HSL1
1796	LOC658987	2.022	1.34559e-13	TcasGA2_TC012685	pollen-specific leucine-rich repeat extensin-like protein 1	; pollen-specific leucine-rich repeat extensin-like protein 1|AUGUSTUS-3.0.2_34432|GLEAN_12685|GLEAN_12686
1797	LOC656399	2.0216	0.0192048		elongator complex protein 3	; elongator complex protein 3|similar to CG15433-PA|AUGUSTUS-3.0.2_04103|GLEAN_04103|putative elongator complex protein 3-like Protein
1798	LOC661235	2.01918	8.96548e-06		pre-rRNA-processing protein TSR1 homolog	; pre-rRNA-processing protein TSR1 homolog|AUGUSTUS-3.0.2_12891|GLEAN_12891|Pre-rRNA-processing protein TSR1 homolog-like Protein
1799	LOC660887	2.01897	0.000100526	TcasGA2_TC009450	far upstream element-binding protein 1	; far upstream element-binding protein 1|far upstream element-binding protein 3|AUGUSTUS-3.0.2_09450|Far upstream element-binding protein 1-like Protein|GLEAN_09450
1800	LOC661892	2.01878	0.0430508	TcasGA2_TC008936	protein SOX-15	; protein SOX-15|transcription factor SOX-11|AUGUSTUS-3.0.2_08936|GLEAN_08936|Putative transcription factor SOX-14-like Protein
1801	LOC655373	2.01869	1.74527e-09	TcasGA2_TC015809	facilitated trehalose transporter Tret1	; facilitated trehalose transporter Tret1|similar to CG8234-PA, isoform A|AUGUSTUS-3.0.2_15809|Facilitated trehalose transporter Tret1-2 homolog-like Protein|GLEAN_15809
1802	LOC657912	2.01859	0.0478233	TcasGA2_TC001711	uncharacterized LOC657912	; uncharacterized protein LOC657912|AUGUSTUS-3.0.2_01711|GLEAN_01711|Protein lin-10-like Protein
1803	LOC658925	2.01848	0.0153524	TcasGA2_TC003042	uncharacterized LOC658925	; uncharacterized protein LOC658925|AUGUSTUS-3.0.2_03042|GLEAN_03042|cuticle protein 6.4
1804	LOC663573	2.01739	0.000500345	TcasGA2_TC011768	proline synthase co-transcribed bacterial homolog protein	; proline synthase co-transcribed bacterial homolog protein|AUGUSTUS-3.0.2_11768|GLEAN_11768|Proline synthase co-transcribed bacterial homolog protein-like Protein
1805	LOC662641	2.01698	0.00437289	TcasGA2_TC013489	ubiquitin-conjugating enzyme E2 J2	; ubiquitin-conjugating enzyme E2 J2|GLEAN_13489
1806	LOC656992	2.01635	0.000285994		4-aminobutyrate aminotransferase, mitochondrial-like	; 4-aminobutyrate aminotransferase, mitochondrial-like
1807	LOC656327	2.0149	0.00349885	TcasGA2_TC011025	V-type proton ATPase 16 kDa proteolipid subunit	; V-type proton ATPase 16 kDa proteolipid subunit|AUGUSTUS-3.0.2_11025|GLEAN_11025|V-type proton ATPase 16 kDa proteolipid subunit-like Protein
1808	LOC656709	2.0098	0.00177187	TcasGA2_TC010516	UNC93-like protein	; UNC93-like protein|AUGUSTUS-3.0.2_10516|GLEAN_10516
1809	LOC663408	2.00764	0.0312319	TcasGA2_TC009151	membralin	; membralin|GLEAN_09151
1810	LOC663996	2.00701	0.000560533		RB1-inducible coiled-coil protein 1	; RB1-inducible coiled-coil protein 1
1811	LOC656484	2.00189	6.26924e-06	TcasGA2_TC002864	vesicle-associated membrane protein-associated protein B	; vesicle-associated membrane protein-associated protein B|AUGUSTUS-3.0.2_02864|GLEAN_02864|Vesicle-associated membrane protein-associated protein B-like Protein
1812	LOC663878	2.00167	0.00273264	TcasGA2_TC013351	uncharacterized LOC663878	; uncharacterized protein LOC663878|AUGUSTUS-3.0.2_13351|AUGUSTUS-3.0.2_13355|Division abnormally delayed protein-like Protein|GLEAN_13351|GLEAN_13352|GLEAN_13355|Pseudouridine-5'-phosphate glycosidase-like Protein|glypican-6|pseudouridine-metabolizing bifunctional protein C1861.05
1813	LOC658865	2.00148	0.00127529	TcasGA2_TC013894, P146	uncharacterized LOC658865	; uncharacterized protein LOC658865|AUGUSTUS-3.0.2_13894|GLEAN_13894|serine protease P146
1814	LOC656355	2.00065	0.00217074	TcasGA2_TC013045	regucalcin	; regucalcin|GLEAN_13045
1815	LOC663731	2.00008	3.21907e-06	TcasGA2_TC009675	26S protease regulatory subunit 4	; 26S protease regulatory subunit 4|26S protease regulatory subunit 4-like Protein|AUGUSTUS-3.0.2_09675|GLEAN_09675
1816	LOC107398263	-2.00159	0.0138639		uncharacterized LOC107398263
1817	LOC659887	-2.0025	0.0122543	TcasGA2_TC000054	pyrimidodiazepine synthase	; pyrimidodiazepine synthase|AUGUSTUS-3.0.2_00054|GLEAN_00054|Glutathione S-transferase omega-2-like Protein|glutathione S-transferase omega-1
1818	LOC656823	-2.01163	0.000845536	TcasGA2_TC004559	uridine phosphorylase 1	; uridine phosphorylase 1|AUGUSTUS-3.0.2_04559|GLEAN_04559|Uridine phosphorylase 1-like Protein
1819	LOC663954	-2.02704	0.0481001	TcasGA2_TC000937	alpha amylase	; alpha-amylase|1,4-alpha-D-glucan glucanohydrolase|GLEAN_00937|alhpa amylase
1820	LOC103312533	-2.07789	0.0295565	TcasGA2_TC032723	serine/threonine-protein phosphatase PP1-alpha-like	; serine/threonine-protein phosphatase PP1-alpha-like|AUGUSTUS-3.0.2_32723|Serine/threonine-protein phosphatase alpha-1 isoform-like Protein
1821	LOC660558	-2.09615	0.0325699	TcasGA2_TC006567	60S ribosomal protein L37a	; 60S ribosomal protein L37a|60S ribosomal protein L37a-like Protein|AUGUSTUS-3.0.2_06567|GLEAN_06567
1822	LOC660211	-2.11799	0.0071466		60S ribosome subunit biogenesis protein NIP7 homolog	; 60S ribosome subunit biogenesis protein NIP7 homolog|60S ribosome subunit biogenesis protein NIP7 homolog-like Protein|AUGUSTUS-3.0.2_06900|GLEAN_06900
1823	LOC654942	-2.12236	0.0168529	TcasGA2_TC006065	dyslexia-associated protein KIAA0319-like protein	; dyslexia-associated protein KIAA0319-like protein|AUGUSTUS-3.0.2_06065|GLEAN_06065
1824	LOC107398873	-2.12707	0.0453761	TcasGA2_TC034936	uncharacterized LOC107398873	; uncharacterized protein LOC107398873|AUGUSTUS-3.0.2_34936
1825	LOC657868	-2.16413	0.0267983	TcasGA2_TC001381	FMRFamide receptor	; FMRFamide receptor|AUGUSTUS-3.0.2_01381|FMRFamide receptor-like Protein|FMRFamide-like G protein-coupled receptor|GLEAN_01381
1826	LOC664009	-2.1862	0.0303386	TcasGA2_TC000938	alpha-amylase	; alpha-amylase|GLEAN_00938
1827	LOC657447	-2.19568	8.61274e-07		glycine cleavage system H protein, mitochondrial	; glycine cleavage system H protein, mitochondrial|AUGUSTUS-3.0.2_10478|GLEAN_10478|Glycine cleavage system H protein, mitochondrial-like Protein
1828	LOC655234	-2.21078	0.0155849	TcasGA2_TC005094	heat shock protein TC005094	; heat shock protein TC005094
1829	LOC655110	-2.25071	3.57844e-07	TcasGA2_TC030784	D-2-hydroxyglutarate dehydrogenase, mitochondrial	; D-2-hydroxyglutarate dehydrogenase, mitochondrial|AUGUSTUS-3.0.2_30784|D-2-hydroxyglutarate dehydrogenase, mitochondrial-like Protein|GLEAN_02689-OG9825
1830	LOC107399231	-2.29368	0.0479545		alpha-amylase-like
1831	LOC663831	-2.36541	0.0178973		voltage-dependent L-type calcium channel subunit beta-2	; voltage-dependent L-type calcium channel subunit beta-1|voltage-dependent L-type calcium channel subunit beta-2|voltage-dependent L-type calcium channel subunit beta-3
1832	LOC657522	-2.3886	0.00741346	TcasGA2_TC010546	putative helicase Mov10l1	; putative helicase Mov10l1|AUGUSTUS-3.0.2_10546|GLEAN_10546|putative RNA helicase armi-like Protein
1833	LOC664242	-2.44276	0.0233203	TcasGA2_TC008856	hypothetical protein	; uncharacterized protein LOC664242|AUGUSTUS-3.0.2_08856|GLEAN_08856
1834	LOC656505	-2.50277	0.000489082	TcasGA2_TC032639	uncharacterized LOC656505	; uncharacterized protein LOC656505|AUGUSTUS-3.0.2_32639
1835	LOC103314330	-2.51365	0.0112159	TcasGA2_TC012752	coiled-coil domain-containing protein 39	; coiled-coil domain-containing protein 39|AUGUSTUS-3.0.2_12752|GLEAN_12752
1836	LOC664253	-2.53311	0.000422402	TcasGA2_TC034082	retinol dehydrogenase 11-like	; retinol dehydrogenase 11-like|AUGUSTUS-3.0.2_34082|WW domain-containing oxidoreductase-like Protein
1837	LOC656880	-2.53888	0.0238381	TcasGA2_TC012817	RWD domain-containing protein 4	; RWD domain-containing protein 4|AUGUSTUS-3.0.2_12817|GLEAN_12817|RWD domain-containing protein 4-like Protein
1838	LOC655079	-2.56966	0.00764797	TcasGA2_TC012323, GLEAN_12323	uncharacterized protein LOC655079	; uncharacterized protein LOC655079|AUGUSTUS-3.0.2_12323
1839	LOC103315122	-2.57101	1.99669e-06		uncharacterized LOC103315122	; uncharacterized protein LOC103315122
1840	LOC103312515	-2.58534	0.0472313	TcasGA2_TC007748	RNA-binding protein 41	; RNA-binding protein 41|AUGUSTUS-3.0.2_07748|GLEAN_07748|RNA-binding protein 41-like Protein
1841	LOC664370	-2.61372	0.000319624	TcasGA2_TC000932	thiamin pyrophosphokinase 1	; thiamin pyrophosphokinase 1|AUGUSTUS-3.0.2_00932|GLEAN_00932|Thiamin pyrophosphokinase 1-like Protein
1842	LOC663817	-2.64762	0.0364319	TcasGA2_TC000868, Elb	elbow B	; uncharacterized protein LOC663817|zinc finger protein Elbow|AUGUSTUS-3.0.2_00868|GLEAN_00868
1843	LOC655526	-2.6501	0.00114295	TcasGA2_TC014250, Gap1, RASA3	GTPase-activating protein	; GTPase-activating protein|GLEAN_14250|GTPase-activating protein 1|RAS p21 protein activator 3
1844	LOC661361	-2.67743	0.0222302	TcasGA2_TC001142	KAT8 regulatory NSL complex subunit 3	; KAT8 regulatory NSL complex subunit 3|AUGUSTUS-3.0.2_01142|GLEAN_01142|KAT8 regulatory NSL complex subunit 3-like Protein
1845	LOC662378	-2.72793	0.0058774	TcasGA2_TC009913	maspardin	; maspardin|AUGUSTUS-3.0.2_09913|GLEAN_09913|Maspardin-like Protein
1846	LOC107399061	-2.82058	0.0491278		uncharacterized LOC107399061
1847	cec2	-2.84458	0.00326932	TcasGA2_TC030482	cecropin 2	; cecropin 2|AUGUSTUS-3.0.2_30482|antimicrobial peptide
1848	LOC662866	-2.84729	7.81946e-07	TcasGA2_TC001161	venom acid phosphatase Acph-1	; venom acid phosphatase Acph-1|AUGUSTUS-3.0.2_01161|GLEAN_01161|Venom acid phosphatase Acph-1-like Protein
1849	LOC658134	-2.85227	0.0073544	TcasGA2_TC033735	DPH3 homolog	; DPH3 homolog|AUGUSTUS-3.0.2_33735|DPH3 homolog-like Protein
1850	LOC100141807	-2.92142	0.00169712	TcasGA2_TC011470	sodium-coupled monocarboxylate transporter 2	; sodium-coupled monocarboxylate transporter 2|GLEAN_11470
1851	Cyp9f2	-2.92442	0.00121414	TcasGA2_TC006445, CYP9Z5	cytochrome P450 isoform 9F2	; cytochrome P450 isoform 9F2|AUGUSTUS-3.0.2_06445|GLEAN_06445|cytochrome P450 9Z5
1852	LOC663259	-2.96972	0.000957076	TcasGA2_TC005437	putative inorganic phosphate cotransporter	; putative inorganic phosphate cotransporter|AUGUSTUS-3.0.2_05437|GLEAN_05437|Putative inorganic phosphate cotransporter-like Protein
1853	LOC103315262	-2.98472	0.0316246	TcasGA2_TC031005	nucleoside-triphosphatase THEP1	; nucleoside-triphosphatase THEP1|AUGUSTUS-3.0.2_31005|Cancer-related nucleoside-triphosphatase homolog-like Protein|cancer-related nucleoside-triphosphatase homolog
1854	LOC100141826	-3.02849	0.00643854	TcasGA2_TC006797	hypothetical protein	; uncharacterized protein LOC100141826|GLEAN_06797
1855	LOC657363	-3.03051	0.0301438	TcasGA2_TC011854	serine--pyruvate aminotransferase	; serine--pyruvate aminotransferase|GLEAN_11854
1856	LOC655218	-3.0999	0.0139201	TcasGA2_TC006310, ATR, mei-41	serine/threonine-protein kinase ATR	; serine/threonine-protein kinase ATR|AUGUSTUS-3.0.2_34040|GLEAN_06310|GLEAN_06311|Serine/threonine-protein kinase ATR-like Protein|ataxia telangiectasia and Rad3-related protein
1857	LOC664057	-3.17902	0.0076581	TcasGA2_TC030049, CI-B14-5a, NDUFA7	NADH dehydrogenase (ubiquinone) 1 alpha subcomplex, 7, 14.5kDa	; NADH dehydrogenase [ubiquinone] 1 alpha subcomplex subunit 7
1858	LOC663326	-3.18919	0.00185167	TcasGA2_TC000383	zinc finger protein OZF	; zinc finger protein OZF|AUGUSTUS-3.0.2_00383|GLEAN_00383|Zinc finger protein 2 homolog-like Protein
1859	LOC659852	-3.2146	0.00769222	TcasGA2_TC013958, NLG-3	neuroligin 3	; neuroligin-4, X-linked|neuroligin-4, Y-linked|AUGUSTUS-3.0.2_13958|AUGUSTUS-3.0.2_33028|Acetylcholinesterase-like Protein|GLEAN_13958|GLEAN_13962|GLEAN_13963|Neuroligin-1-like Protein
1860	LOC657130	-3.27844	0.0451306	TcasGA2_TC016229, Neb-cGP	Neb-cGP	; up-regulated during skeletal muscle growth protein 5|AUGUSTUS-3.0.2_16229|GLEAN_16229
1861	HEX1B	-3.29615	0.0472258	TcasGA2_TC005377, GLEAN_05377	hexamerin 1B	; hexamerin 1B|AUGUSTUS-3.0.2_05377|Larval serum protein 2-like Protein
1862	LOC656780	-3.37743	0.0259226	TcasGA2_TC006457	probable G-protein coupled receptor 52	; probable G-protein coupled receptor 52|AUGUSTUS-3.0.2_06457|GLEAN_06457|Tachykinin-like peptides receptor 86C|putative ecdysteroids/dopamine receptor
1863	LOC659160	-3.38737	0.00455828	TcasGA2_TC002732	rho GTPase-activating protein 1	; rho GTPase-activating protein 1|AUGUSTUS-3.0.2_02732|GLEAN_02732|Rho GTPase-activating protein 68F-like Protein
1864	LOC103313987	-3.38833	2.53868e-07	TcasGA2_TC005804	41 kDa spicule matrix protein	; 41 kDa spicule matrix protein|GLEAN_05804
1865	LOC660983	-3.41283	0.030062	TcasGA2_TC008037	kinesin-like protein CG14535	; kinesin-like protein CG14535|AUGUSTUS-3.0.2_32803|GLEAN_08037|GLEAN_08039|GLEAN_08040|GLEAN_08042
1866	LOC655300	-3.48677	0.000689259	TcasGA2_TC012234	facilitated trehalose transporter Tret1-2 homolog	; facilitated trehalose transporter Tret1-2 homolog|AUGUSTUS-3.0.2_12234|Facilitated trehalose transporter Tret1-2 homolog-like Protein|GLEAN_12234
1867	LOC658191	-3.49268	0.0147361	TcasGA2_TC002846	limbic system-associated membrane protein	; limbic system-associated membrane protein|AUGUSTUS-3.0.2_31034|GLEAN_02846|GLEAN_02847|GLEAN_02849|GLEAN_02850|Protein amalgam-like Protein
1868	LOC661337	-3.50843	0.00104527	TcasGA2_TC009826	protein prickle-like	; protein espinas-like|protein prickle-like|AUGUSTUS-3.0.2_09826|AUGUSTUS-3.0.2_09828|AUGUSTUS-3.0.2_09830|Protein prickle-like Protein
1869	LOC103313187	-3.53053	0.0318442		uncharacterized LOC103313187	; uncharacterized protein LOC103313187
1870	LOC659189	-3.54721	0.000242458	TcasGA2_TC005865	putative inorganic phosphate cotransporter	; putative inorganic phosphate cotransporter|AUGUSTUS-3.0.2_05865|GLEAN_05865|Putative inorganic phosphate cotransporter-like Protein
1871	LOC103314641	-3.60033	0.0156106	TcasGA2_TC033014	chymotrypsin-like elastase family member 2A	; chymotrypsin-like elastase family member 2A|AUGUSTUS-3.0.2_33014|Serine proteases 1/2-like Protein
1872	Z9desB	-3.60617	3.5086e-05	GLEAN_16415, TcasZ9desB	Z9 acyl-CoA desaturase B	; Z9 acyl-CoA desaturase B|AUGUSTUS-3.0.2_16415|Acyl-CoA Delta(11) desaturase-like Protein
1873	LOC660002	-3.6382	0.000338341	TcasGA2_TC006755, TSC2	tuberin	; tuberin|AUGUSTUS-3.0.2_06755|GLEAN_06755|Tuberin-like Protein|tuberous sclerosis 2
1874	LOC656267	-3.63943	1.86052e-05	TcasGA2_TC014346, CYP346A1	cytochrome P450 346A1	; probable cytochrome P450 6a23|GLEAN_14346
1875	LOC100141678	-3.75269	0.0270179	TcasGA2_TC005881	uncharacterized LOC100141678	; uncharacterized protein LOC100141678|AUGUSTUS-3.0.2_05881|GLEAN_05881
1876	LOC100141742	-3.82462	0.0390486	TcasGA2_TC031507	DNA (cytosine-5)-methyltransferase PliMCI-like	; DNA (cytosine-5)-methyltransferase PliMCI-like|AUGUSTUS-3.0.2_31507|DNA (cytosine-5)-methyltransferase PliMCI-like Protein
1877	LOC660357	-3.86132	0.0440798	TcasGA2_TC014380	probable multidrug resistance-associated protein lethal(2)03659	; probable multidrug resistance-associated protein lethal(2)03659|GLEAN_14380
1878	LOC658974	-3.91457	6.71521e-11		cathepsin L-like proteinase	; cathepsin L-like proteinase|AUGUSTUS-3.0.2_01950|Cathepsin L-like Protein|GLEAN_01950
1879	LOC656530	-3.99273	0.00149434	TcasGA2_TC006097	ankyrin repeat domain-containing protein 16	; ankyrin repeat domain-containing protein 16|AUGUSTUS-3.0.2_06097|Ankyrin repeat and KH domain-containing protein mask-like Protein|GLEAN_06097
1880	LOC662448	-4.13124	0.00191214	TcasGA2_TC015587	somatomedin-B and thrombospondin type-1 domain-containing protein	; somatomedin-B and thrombospondin type-1 domain-containing protein|AUGUSTUS-3.0.2_34735|GLEAN_15587|GLEAN_15589|Somatomedin-B and thrombospondin type-1 domain-containing protein-like protein
1881	LOC107398274	-4.19303	0.000158051		endothelin-converting enzyme-like 1	; endothelin-converting enzyme-like 1
1882	LOC660322	-4.42336	0.000162124	TcasGA2_TC001692, disco-r	zinc finger protein basonuclin-2	; zinc finger protein basonuclin-2|AUGUSTUS-3.0.2_01693|AUGUSTUS-3.0.2_31551|GLEAN_01692|GLEAN_01693|disco-related
1883	LOC661112	-4.429	2.36393e-20	TcasGA2_TC005845	cytosolic Fe-S cluster assembly factor NUBP2 homolog	; cytosolic Fe-S cluster assembly factor NUBP2 homolog|AUGUSTUS-3.0.2_05845|Cytosolic Fe-S cluster assembly factor NUBP2 homolog-like Protein|GLEAN_05845
1884	LOC103312159	-4.54026	0.0322711	TcasGA2_TC001265	uncharacterized LOC103312159	; uncharacterized protein LOC103312159|AUGUSTUS-3.0.2_32236|GLEAN_01265
1885	LOC658202	-4.72025	0.0176207	TcasGA2_TC014104	cuticlin-1	; cuticlin-1|AUGUSTUS-3.0.2_14104|Cuticlin-1-like Protein|GLEAN_14104
1886	LOC655598	-4.77562	0.000220302	TcasGA2_TC007094	TBC1 domain family member 19	; TBC1 domain family member 19|AUGUSTUS-3.0.2_07094|GLEAN_07094|TBC1 domain family member 19-like Protein
1887	LOC656578	-4.77897	0.0108338	TcasGA2_TC001214	metaxin-1	; metaxin-1|AUGUSTUS-3.0.2_01214|GLEAN_01214|Metaxin-1 homolog-like Protein
1888	LOC664309	-5.03372	3.73323e-05	TcasGA2_TC003543	chaoptic-like protein	; chaoptin|AUGUSTUS-3.0.2_03544|AUGUSTUS-3.0.2_34590|GLEAN_03543|GLEAN_03544
1889	LOC664041	-5.05647	0.0115035	TcasGA2_TC000940	alpha-amylase-like	; alpha-amylase-like|AUGUSTUS-3.0.2_00940|Alpha-amylase A-like Protein
1890	LOC107398096	-5.10623	1.99951e-05	TcasGA2_TC033481	uncharacterized LOC107398096	; uncharacterized protein LOC107398096|AUGUSTUS-3.0.2_33481
1891	LOC103312820	-5.23435	4.81556e-06		uncharacterized LOC103312820
1892	LOC657276	-5.64937	0.0446499	TcasGA2_TC009426	protein disabled	; protein disabled|AUGUSTUS-3.0.2_09426|GLEAN_09426
1893	LOC661102	-6.24628	0.00374784	TcasGA2_TC015225	alpha-esterase like protein E1	; alpha-esterase like protein E1|AUGUSTUS-3.0.2_34086|GLEAN_15225
1894	LOC103312981	-6.53362	0.00666722	TcasGA2_TC013719	hypothetical protein	; uncharacterized protein LOC103312981|AUGUSTUS-3.0.2_13719|GLEAN_13719
1895	gpb5	-6.58449	0.00225173	TcasGA2_TC012548	glycoprotein hormone beta-5	; glycoprotein hormone beta-5|AUGUSTUS-3.0.2_12548|GLEAN_12548|putative glycoprotein hormone-beta5
1896	Ubox5	-6.84476	0.0306531	TcasGA2_TC031431	U-box domain containing 5	; U-box domain containing 5|AUGUSTUS-3.0.2_31431|RING finger protein 37-like Protein
1897	LOC657717	-7.68299	2.5218e-05	TcasGA2_TC003891, zfh2	zinc finger homeobox protein 4	; zinc finger homeobox protein 4|AUGUSTUS-3.0.2_32626|GLEAN_03891|GLEAN_03893|Zn finger homeodomain 2
1898	LOC107397974	-8.05071	0.00219765		uncharacterized LOC107397974
1899	LOC660846	-9.29038	1.15964e-05	TcasGA2_TC012283	UDP-glucuronosyltransferase 2C1	; UDP-glucuronosyltransferase 2C1|AUGUSTUS-3.0.2_12283|GLEAN_12283|UDP-glucuronosyltransferase 2C1-like Protein
1900	LOC103314213	-9.38085	8.39156e-06		uncharacterized MFS-type transporter C09D4.1-like	; uncharacterized MFS-type transporter C09D4.1-like
1901	LOC103312862	-9.84562	0.00202355	TcasGA2_TC008461, oaf	out at first protein	; out at first protein|AUGUSTUS-3.0.2_32916|GLEAN_08461|GLEAN_08462|GLEAN_08464|Out at first protein-like Protein
1902	LOC107397608	-10.5487	3.1385e-10	TcasGA2_TC032558	uncharacterized LOC107397608	; uncharacterized protein LOC107397608|AUGUSTUS-3.0.2_32558|AUGUSTUS-3.0.2_32615
1903	LOC657688	-10.6706	0.049989	TcasGA2_TC004118	Kv channel-interacting protein 4	; Kv channel-interacting protein 1|Kv channel-interacting protein 4|AUGUSTUS-3.0.2_04119|GLEAN_04118|GLEAN_04119|Neurocalcin homolog-like Protein
1904	LOC107397656	-12.0959	0.000202275		uncharacterized LOC107397656
1905	LOC107398769	-13.0498	0.00289729		odorant receptor 2a-like	; odorant receptor 2a-like
1906	LOC655929	-13.1031	5.22472e-07	TcasGA2_TC003875, RecQ4	ATP-dependent DNA helicase Q4	; ATP-dependent DNA helicase Q4|GLEAN_03875
1907	LOC107397473	-14.9215	0.0399873	TcasGA2_TC004154	uncharacterized LOC107397473	; uncharacterized protein LOC107397473|GLEAN_04154|GLEAN_04155
1908	LOC661886	-16.7642	5.54259e-12	TcasGA2_TC030676	nuclear receptor subfamily 2 group E member 1	; nuclear receptor subfamily 2 group E member 1|nuclear receptor subfamily 2 group F member 5|retinoic acid receptor RXR-alpha-B|GLEAN_13148-OG22872
1909	LOC659688	-16.8062	0.000299954	TcasGA2_TC014225	transcription factor EC	; microphthalmia-associated transcription factor|transcription factor EC|AUGUSTUS-3.0.2_14225|GLEAN_14225|Transcription factor E3-like Protein
1910	LOC655925	-19.0642	4.6724e-11	TcasGA2_TC003755	whirlin	; whirlin|AUGUSTUS-3.0.2_32535|AUGUSTUS-3.0.2_32536|GLEAN_03755|GLEAN_03756|Whirlin-like Protein
1911	LOC656212	-29.574	0.00579054	TcasGA2_TC001718	solute carrier organic anion transporter family member 5A1	; solute carrier organic anion transporter family member 5A1|AUGUSTUS-3.0.2_01718|GLEAN_01718|Solute carrier organic anion transporter family member 4A1-like Protein
1912	Trnar-ccu_3	-43.3914	0.00320191
1913	LOC107398519	-120.61	0.00222923		uncharacterized LOC107398519

## Sheet: dsHDAC1 vs dsHDAC11
	Important common genes significantly up-regulated in dsHDAC1 and dsHDAC11
	Gene symbol	Gene description	dsHDAC1		dsHDAC11
			Fold Change	P-value	Fold Change	P-value
1	LOC103312217	breast cancer type 2 susceptibility protein homolog	49.49	0.02	17.59	0.01
2	LOC656118	protein transport protein SFT2	39.63	0	33.42	0.01
3	LOC663669	uncharacterized LOC663669	29.92	0	29.52	0
4	LOC660562	rho GTPase-activating protein 100F	27.45	0.02	29.8	0.03
5	LOC660015	probable palmitoyltransferase ZDHHC24	27.04	0.03	38.04	0
6	LOC103315180	receptor-type tyrosine-protein phosphatase epsilon	25.72	0	9.94	0
7	LOC660160	highwire	20.89	0	17.44	0
8	LOC103313286	uncharacterized LOC103313286	18.9	0.02	18.04	0.03
9	LOC103314950	uncharacterized LOC103314950	17.42	0.01	30.56	0
10	LOC663763	dnaJ homolog subfamily C member 17	16.88	0	11.82	0.03
11	LOC661545	SHC SH2 domain-binding protein 1	16.81	0.04	28.96	0.02
12	LOC103313833	uncharacterized LOC103313833	15.82	0.01	16.13	0
13	LOC656647	coilin	14.27	0	12.46	0
14	LOC655848	uncharacterized LOC655848	12.22	0	17.87	0
15	LOC103313378	oocyte zinc finger protein XlCOF28	12.01	0.01	12.74	0
16	LOC660698	ATP-dependent RNA helicase DDX54	10.64	0	7.53	0.01
17	LOC659585	beta carbonic anhydrase 1	10.34	0	7.32	0
18	LOC103312139	major facilitator superfamily domain-containing protein 6-A	10.25	0.01	8.73	0.02
19	Mlpt	mille-pattes	10.23	0	9.16	0.03
20	LOC659059	probable tyrosyl-DNA phosphodiesterase	10.08	0	7.05	0.01
21	LOC663583	replication factor C subunit 4	9.91	0	8.66	0
22	LOC664182	exosome complex component MTR3	9.74	0.01	11.59	0
23	LOC662897	probable medium-chain specific acyl-CoA dehydrogenase, mitochondrial	9.42	0	12.14	0
24	LOC660366	ataxin-2 homolog	9.23	0	9.7	0
25	LOC661407	kanadaptin	8.8	0.01	7.6	0.02
26	LOC107397807	probable DNA polymerase	8.68	0	8.97	0
27	LOC663690	hypothetical protein	8	0	8.62	0
28	LOC658704	protein FAM184A	7.66	0.01	16.58	0.01
29	LOC664565	CREB-binding protein	7.64	0.01	7.73	0
30	LOC660800	mitochondrial import inner membrane translocase subunit Tim13	7.1	0.04	8.62	0
31	LOC103313291	zinc finger protein 33B	7.02	0.02	7.5	0.01
32	LOC657102	probable multidrug resistance-associated protein lethal (2)03659	6.94	0	6.24	0
33	LOC662831	serpin peptidase inhibitor 24	6.82	0.01	9.53	0.01
34	LOC100142242	cAMP-regulated phosphoprotein 21	6.55	0.03	5.01	0
35	LOC103313960	CD59 glycoprotein-like	6.53	0.01	8.09	0
36	LOC663698	myotubularin-related protein 2	6.31	0	5.59	0
37	LOC662163	alpha-N-acetylgalactosaminidase	6.28	0	4.43	0.01
38	LOC659295	target of rapamycin complex 2 subunit MAPKAP1	6.19	0.01	7.94	0
39	LOC663650	NFX1-type zinc finger-containing protein 1	6.09	0	5.56	0
40	LOC657622	tripeptidyl-peptidase 2	6.08	0	5.28	0.01
41	LOC658515	receptor-type tyrosine-protein phosphatase T	5.98	0	4.71	0.01
42	LOC657918	transcription termination factor 2	5.91	0.01	4.91	0.05
43	LOC664522	ras-related protein Rab-32	5.78	0	5.9	0
44	LOC107397947	sodium-coupled monocarboxylate transporter 1-like	5.69	0	5.48	0
45	LOC103314036	G-protein coupled receptor 161	5.47	0	5.13	0

## Sheet: Melanization terms 
	Melanization terms in dsHDAC11_RNA-seq data
	Feature ID	Locus Tag	Gene Description	Fold Change	P-value
1	Ddc	TcasGA2_TC013480	dopa decarboxylase	4.45703	1.20792e-13
2	Dat	TcasGA2_TC008204, Nat	dopamine N acetyltransferase	2.49943	0
3	Lac1	TcasGA2_TC000821, TcLac1	laccase 1	2.36189	0.000414769
4	Th	TcasGA2_TC002496	tyrosine hydroxylase	3.39429	2.56239e-13
5	Y-2	TcasGA2_TC003539	yellow-2	4.96611	0.000173163
6	LOC658959	TcasGA2_TC005479	putative polypeptide N-acetylgalactosaminyltransferase 9	2.12385	0.000436456
7	LOC662163	TcasGA2_TC009635	alpha-N-acetylgalactosaminidase	4.43044	0.000464139
8	LOC664097	TcasGA2_TC005702	polypeptide N-acetylgalactosaminyltransferase 1	3.82275	0.00574044
9	LOC664335	TcasGA2_TC002894	probable serine hydrolase	3.05187	0.0170292
10	LOC658356	TcasGA2_TC013310, serpin28	serpin B3	2.73617	0.00355156
11	LOC662831	TcasGA2_TC006255, serpin24	serpin peptidase inhibitor 24	9.53094	0.00045659
12	LOC656375	TcasGA2_TC011718, serpin27	serpin peptidase inhibitor 27	2.65126	0.00562387
13	Serpin5	TcasGA2_TC030077	serpin peptidase inhibitor 5	3.0437	0.0280428
14	LOC663238	TcasGA2_TC005740, serpin7, serpin8	serpin peptidase inhibitor 7	2.70824	1.66533e-14
15	LOC661222	TcasGA2_TC005844	suppressor of cytokine signaling 2	9.40957	0.00388951
16	LOC100142215	TcasGA2_TC003596	suppressor of cytokine signaling 5	2.57794	2.00155e-07
17	LOC103315128		toll-like receptor 13	2.82125	0.0385093
18	LOC662131	TcasGA2_TC006154	toll-like receptor 2	2.44777	0.0146961
19	LOC658706	TcasGA2_TC011197	tolloid-like protein 1	2.19587	2.92988e-12
20	LOC664100	TcasGA2_TC003525	TOM1-like protein 2	3.43171	0.000450159
21	Tsl	TcasGA2_TC008090	torso-like protein	3.21588	0.00114812
22	LOC103313165	TcasGA2_TC013326, P140	venom protease/serine protease P140	3.85698	2.52826e-05
23	LOC107399226	TcasGA2_TC032161	serine protease easter-like	3.00652	0.000391173
24	LOC656833	TcasGA2_TC001301, H29	serine protease H29	2.37334	0.0154183
25	LOC661766	TcasGA2_TC015130, P154	serine protease P154	2.26522	0
26	LOC659360	TcasGA2_TC004770, P55	serine protease P55	2.11947	0.00235703
27	LOC660175	TcasGA2_TC013416, P142	serine protease snake	3.44864	0.00091459
28	LOC100124592	TcasGA2_TC034596	aspartate 1-decarboxylase	3.18043	2.76543e-05
29	LOC656627		aspartyl/asparaginyl beta-hydroxylase	2.35584	5.7746e-05
30	LOC663248	TcasGA2_TC007936	bifunctional lysine-specific demethylase and histidyl-hydroxylase NO66	4.41233	0.0475266
31	LOC658275	TcasGA2_TC003968	beta-1,3-galactosyltransferase 5	2.23079	0.0464905
32	Nag3	TcasGA2_TC001116	beta-N-acetylglucosaminidase NAG3	2.46779	0.0234482
33	LOC100142149	TcasGA2_TC012579	caspase Dronc	5.1952	0.000478046
